# Supplementary material
Source: publisher figshare collection journal article supplement (https://acs.figshare.com/ndownloader/files/8753998)
Supplement: Supplementary file 1 [file 8753998]

## Supporting Information

### **Modifying Emission Spectral Bandwidth of Phosphorescent Platinum(II) Complexes Through Synthetic Control**

*Guijie Li, Alicia Wolfe, Jason Brooks, Zhi-Qiang Zhu, Jian Li\**

#### Table of Contents

|                                                                                                                                           |          |
|-------------------------------------------------------------------------------------------------------------------------------------------|----------|
| General Procedures.....                                                                                                                   | S2       |
| Experimental Procedures.....                                                                                                              | S3- S12  |
| NMR spectra.....                                                                                                                          | S13- S32 |
| <i>Figure S1</i> . Tertradentate Pt(II) complexes discussed in this report.....                                                           | S33      |
| <i>Figure S2-S11</i> : Optimized molecular structure of PtON1 analogues based on the DFT calculation.....                                 | S34-S38  |
| <i>Figure S12</i> : Chemical Structures of PtON1, PtON6, PtON7 and their derivatives .....                                                | S39      |
| <i>Table S 1</i> : Selected bond lengths for PtON1 and its analoges based on the DFT calculation and X-ray crystallographic analysis..... | S40      |
| <i>Table S2</i> : Selected bond angles for PtON1 and its analoges based on the DFT calculation and X-ray crystallographic analysis.....   | S40-S41  |
| <i>Figure S13-S21</i> : Cyclic voltammogram of the Pt(II) complesex.....                                                                  | S41-S45  |
| <i>Figure S22-S31</i> : Absorption and emission spectra of the Pt(II) complesex.....                                                      | S46-S50  |
| <i>Figure S32-S31</i> : Excitation spectra of PtON1.....                                                                                  | S51      |
| References.....                                                                                                                           | S51      |

## General Procedures

All commercial reagents were purchased and used as received without further purification.  $\text{K}_2\text{PtCl}_4$  was purchased from Aldrich Chemical.  $^n\text{Bu}_4\text{NBr}$  and  $\text{CuI}$  were purchased from Aldrich Chemical. Silica gel (40-60 $\mu\text{m}$ ) was purchased from Agela Technologies. Solvents toluene (low water) and THF were purchased from J. T. Baker and Aldrich respectively. 2-Bromopyridine was purchased from Alfa Aesar. 2-Bromo-4-tert-butylpyridine was purchased from AfferChem, Inc. 2-Bromo-4-methylpyridine, 2-bromo-5-methylpyridine and 2-bromo-4-(trifluoromethyl)pyridine were purchased from Matrix Scientific. 2-Bromo-6-methylpyridine was purchased from Oakwood Products, Inc. 2-Chloro-4-iodopyridine was purchased from Ark Pharm, Inc.

$^1\text{H}$  NMR spectra were recorded at 400 MHz,  $^{13}\text{C}$  NMR spectra were recorded at 100 or 125 MHz on Varian Liquid-State NMR instruments in  $\text{DMSO}-d_6$  solutions and chemical shifts were referenced to residual protiated solvent.  $^1\text{H}$  NMR spectra were recorded with residual  $\text{H}_2\text{O}$  ( $\delta = 3.33$  ppm in  $\text{DMSO}-d_6$ ;  $\delta = 1.52$  ppm in  $\text{CD}_2\text{Cl}_2$ ) as internal reference;  $^{13}\text{C}$  NMR spectra were recorded with  $\text{DMSO}-d_6$  ( $\delta = 39.52$  ppm) or  $\text{CD}_2\text{Cl}_2$  ( $\delta = 53.84$  ppm) as internal reference.  $^{19}\text{F}$  NMR spectra was referenced to  $\text{PhCF}_3$  in  $\text{C}_6\text{D}_6$  ( $\delta = -65.00$  ppm) as external standard. The following abbreviations (or combinations thereof) were used to explain  $^1\text{H}$  NMR multiplicities: s = singlet, d = doublet, t = triplet, q = quartet, m = multiplet, br = broad. Mass spectra were recorded on Shimadzu Biotech Axima Performance MALDI-TOF mass spectrometer. The Microanalysis Laboratory at Shanghai Institute of Organic Chemistry performed the elemental analysis. Density functional theory (DFT) calculations were performed using the Titan software package (wave function, Inc.) at the B3LYP/LACVP\*\* level.

Steady state emission experiments at room temperature were performed on a Horiba Jobin Yvon FluoroLog-3 spectrometer.

## Experimental Procedures

### Synthesis of **Ligand ON1**:

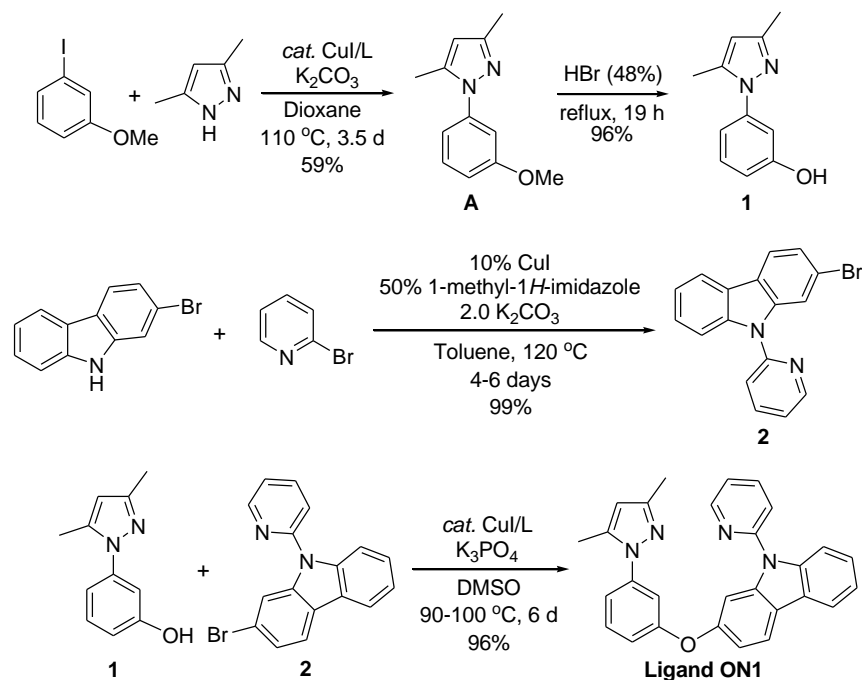

### Synthesis of 1-(3-methoxyphenyl)-3,5-dimethyl-1H-pyrazole **A**:

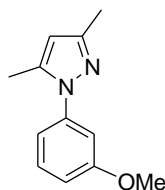

A mixture of 1-iodo-3-methoxybenzene (7.15 mL, 60 mmol, 1.0 eq), 3,5-dimethyl-1H-pyrazole (6.92 g, 72 mmol, 1.2 eq), CuI (0.46 g, 2.4 mmol, 0.04 eq), K<sub>2</sub>CO<sub>3</sub> (17.41 g, 126 mmol, 2.1 eq), *trans*-1,2-cyclohexanediamine (1.37 g, 12 mmol, 0.2 eq) and solvent dioxane (45 mL) was stirred at a temperature of 110 °C for 3.5 days under a nitrogen atmosphere, then cooled down to ambient temperature. The solid was filtered off and washed with ethyl acetate. The filtrate was concentrated under reduced pressure and the residue was purified through column chromatography on silica gel using hexane and ethyl acetate (10:1-3:1) as eluent to obtain the desired product 1-(3-methoxyphenyl)-3,5-dimethyl-1H-pyrazole **A** as a brown liquid 7.12 g in 59% yield. <sup>1</sup>H NMR (DMSO-*d*<sub>6</sub>, 400 MHz): δ 2.18 (s, 3H), 2.30 (s, 3H), 3.80 (s, 3H), 6.06 (s, 1H), 6.95 (dd, *J* = 8.0, 2.4 Hz, 1H), 7.02-7.06 (m, 2H), 7.39 (t, *J* = 8.0 Hz, 1H).

### Synthesis of 3-(3,5-dimethyl-1H-pyrazol-1-yl)phenol **1**:

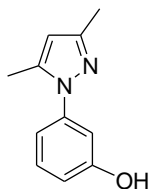

A solution of 1-(3-methoxyphenyl)-3,5-dimethyl-1*H*-pyrazole **A** (7.10 g, 35.11 mmol) in hydrogen bromide acid (45 mL, 48%) refluxed (110-120 °C) for 19 hours under a nitrogen atmosphere. Then the mixture was cooled down to ambient temperature and neutralized with a solution of K<sub>2</sub>CO<sub>3</sub> in water until there was no gas to generate. Then the precipitate was filtered off and washed with water for several times. The collected solid was dried in air under reduced pressure to afford the product as a brown solid 6.33 g in 96% yield. <sup>1</sup>H NMR (DMSO-*d*<sub>6</sub>, 400 MHz): δ 2.16 (s, 3H), 2.28 (s, 3H), 6.04 (s, 1H), 6.75-6.77 (m, 1H), 6.86-6.89 (m, 2H), 7.26 (t, *J* = 8.0 Hz, 1H), 9.73 (s, 1H). <sup>13</sup>C NMR (DMSO-*d*<sub>6</sub>, 100 MHz): δ 12.29, 13.30, 107.07, 111.10, 113.94, 114.43, 129.71, 138.95, 140.70, 147.57, 157.84.

#### Improved synthesis of 2-bromo-9-(pyridin-2-yl)-9*H*-carbazole **2**:

A mixture of 2-bromocarbazole (3.91 g, 15.89 mmol, 1.0 eq), 2-bromopyridine (4.55 mL, 47.68 mmol, 3.0 eq), CuI (0.30 g, 1.59 mmol, 0.1 eq), K<sub>2</sub>CO<sub>3</sub> (4.39 g, 31.78 mmol, 2.0 eq), 1-methyl-1*H*-imidazole (0.63 mL, 7.95 mmol, 0.5 eq) and toluene (60 mL) was stirred at a temperature of 120 °C for 4-6 days under a nitrogen atmosphere, then cooled down to ambient temperature. The reaction was monitored by TLC until the starting material 2-bromocarbazole was consumed completely. The solid was filtered off and washed with ethyl acetate. The filtrate was concentrated under reduced pressure and the excess 2-bromopyridine was also distilled under reduced pressure at high temperature. The residue was purified through column chromatography on silica gel using dichloromethane as eluent to obtain the desired product as a white solid 5.10 g in 99% yield. <sup>1</sup>H NMR (DMSO-*d*<sub>6</sub>, 400 MHz): δ 7.37 (t, *J* = 8.0 Hz, 1H), 7.49-7.55 (m, 3H), 7.78 (d, *J* = 8.0 Hz, 1H), 7.83 (d, *J* = 8.4 Hz, 1H), 7.99 (d, *J* = 1.6 Hz, 1H), 8.16 (td, *J* = 8.0, 2.0 Hz, 1H), 8.24 (d, *J* = 8.4 Hz, 1H), 8.29 (d, *J* = 7.6 Hz, 1H), 8.77 (dd, *J* = 5.2, 1.2 Hz, 1H). This <sup>1</sup>H NMR data is in agreement with the reported literature<sup>S1</sup>. It should be noted that the starting material 2-bromocarbazole must be consumed completely and the excess must be removed from the mixture, because it is difficult to separate from the product through column chromatography.

Synthesis of 2-(3-(3,5-dimethyl-1*H*-pyrazol-1-yl)phenoxy)-9-(pyridin-2-yl)-9*H*-carbazole  
**Ligand ON1:**

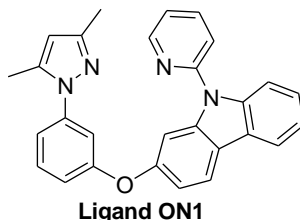

To a dry pressure vessel equipped with a magnetic stir bar, added 3-(3,5-dimethyl-1*H*-pyrazol-1-yl)phenol **2** (1.27 g, 6.75 mmol, 1.0 eq), 2-bromo-9-(pyridin-2-yl)-9*H*-carbazole **3** (2.62 g, 8.10 mmol, 1.2 eq), CuI (0.13 g, 0.675 mmol, 0.1 eq), picolinic acid (0.17 g, 1.35 mmol, 0.2 eq), K<sub>3</sub>PO<sub>4</sub> (2.87 g, 13.50 mmol, 2.0 eq) and DMSO (20 mL). The mixture was bubbled with nitrogen for 30 minutes and then vessel was sealed. The mixture was stirred in an oil bath at a temperature of 90-100°C for 6 days, then cooled down to ambient temperature. Diluted with ethyl acetate. The solid was filtered off and washed with much ethyl acetate. The filtrate was then washed with water for three time and then dried over sodium sulfate. Filtered and the solvent was removed under reduced pressure, the residue was purified through column chromatography on silica gel using hexane/ethyl acetate (10:1-3:1-2:1) as eluent to obtain the desired product as a colorless sticky liquid 2.80 g in 96% yield. <sup>1</sup>H NMR (DMSO-*d*<sub>6</sub>, 400 MHz): δ 2.11 (s, 3H), 2.24 (s, 3H), 6.01 (s, 1H), 7.02-7.04 (m, 1H), 7.07-7.11 (m, 2H), 7.21-7.24 (m, 1H), 7.33 (t, *J* = 7.6 Hz, 1H), 7.41-7.48 (m, 3H), 7.53 (d, *J* = 2.4 Hz, 1H), 7.76 (d, *J* = 8.8 Hz, 2H), 8.07 (td, *J* = 7.6, 2.0 Hz, 1H), 8.21 (d, *J* = 8.0 Hz, 1H), 8.27 (d, *J* = 8.4 Hz, 1H), 8.66-8.68 (m, 1H). <sup>13</sup>C NMR (DMSO-*d*<sub>6</sub>, 100 MHz): δ 12.21, 13.23, 102.42, 107.48, 111.10, 113.25, 113.32, 116.26, 118.25, 119.04, 120.03, 120.19, 121.25, 121.79, 122.13, 123.24, 125.98, 130.41, 139.24, 139.34, 139.51, 139.92, 140.93, 148.08, 149.52, 150.45, 154.77, 157.93.

Synthesis of 2-bromo-*N,N*-dimethylpyridin-4-amine<sup>S2</sup>:

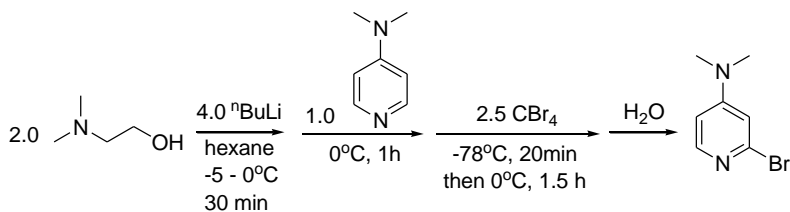

2-(Dimethylamino)ethanol (2.1 mL, 20.0 mmol, 2.0 eq) and hexane (25 mL) were added to a three-necked flask equipped with a magnetic stir bar under nitrogen. The mixture was then cooled

to  $-5 - 0\text{ }^{\circ}\text{C}$  and  $n\text{-BuLi}$  (16 mL, 40.0 mmol, 4.0 eq, 2.5 M in hexane) was added dropwise. After stirring for 30 minutes, *N,N*-dimethylpyridin-4-amine (1.22 g, 10.0 mmol, 1.0 eq) was added. The mixture was stirred at  $0\text{ }^{\circ}\text{C}$  for 1 hour, then cooled down to  $-78\text{ }^{\circ}\text{C}$  in dry ice-acetone bath and  $\text{CBr}_4$  (8.29 g, 25.0 mmol, 2.5 eq) was added. Then the temperature raised to  $0\text{ }^{\circ}\text{C}$  in 1.5 hours and quenched with water (50 mL). The organic layer was separated and the aqueous layer was extracted with dichloromethane for three times. The organic layer was combined together, dried over sodium sulphate. Filtered and the solvent was removed under reduced pressure, the residue was purified through column chromatography on silica gel using hexane/ethyl acetate (2:1-1:1) as eluent to obtain the desired product as a brown solid 832 mg in 41% yield.  $^1\text{H}$  NMR ( $\text{DMSO-}d_6$ , 400 MHz):  $\delta$  2.96 (s, 6H), 6.64 (dd,  $J = 6.0, 2.4\text{ Hz}$ , 1H), 6.72 (d,  $J = 2.8\text{ Hz}$ , 1H), 7.86 (d,  $J = 6.0\text{ Hz}$ , 1H).

Synthesis of 2-chloro-4-phenylpyridine:

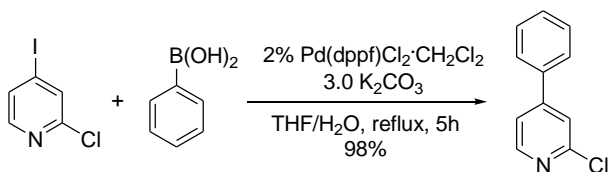

2-Chloro-4-iodopyridine (7.18 g, 30.0 mmol, 1.0 eq), phenylboronic acid (4.02 g, 33.0 mmol, 1.1 eq),  $\text{Pd(dppf)Cl}_2 \cdot \text{CH}_2\text{Cl}_2$  (0.49 g, 0.6 mmol, 0.02 eq) and  $\text{K}_2\text{CO}_3$  (12.44 g, 90.0 mmol, 3.0 eq) were added to a three-necked flask equipped with a magnetic stir bar. The flask was evacuated and backfilled with nitrogen, this evacuation and backfill procedure was repeated for another twice. Then THF (60 mL) and  $\text{H}_2\text{O}$  (15 mL) were added under nitrogen. The mixture refluxed for 5 hours and TLC monitored that the starting material 2-chloro-4-iodopyridine was consumed completely. Then water (40 mL) was added and the organic layer was separated. The aqueous layer was extracted with ethyl acetate twice. The organic layer was combined together, dried over sodium sulphate. Filtered and the solvent was removed under reduced pressure, the residue was purified through column chromatography on silica gel using hexane/ethyl acetate (10:1) as eluent to obtain the desired product as a yellow solid 5.56 g in 98% yield.  $^1\text{H}$  NMR ( $\text{DMSO-}d_6$ , 400 MHz):  $\delta$  7.52-7.54 (m, 3H), 7.76 (d,  $J = 4.8\text{ Hz}$ , 1H), 7.85 (br, 3H), 8.47 (d,  $J = 4.8\text{ Hz}$ , 1H).

Synthesis of 9-(2-chloropyridin-4-yl)-9*H*-carbazole:

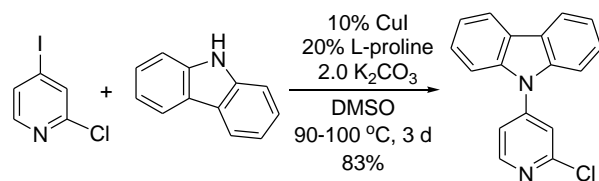

A mixture of 2-chloro-4-iodopyridine (700 mg, 2.92 mmol, 1.2 eq), carbazole (407 mg, 2.43 mmol, 1.0 eq), CuI (46 mg, 0.24 mmol, 0.1 eq), K<sub>2</sub>CO<sub>3</sub> (671 mg, 4.86 mmol, 2.0 eq), L-proline (56 mg, 0.49 mmol, 0.2 eq) in DMSO (10 mL) was stirred at a temperature of 90-100 °C for 3 days under a nitrogen atmosphere and then cooled down to ambient temperature. The mixture was diluted with a plenty of ethyl acetate, and then washed with water three times. The organic layer was separated and dried over sodium sulphate. The solid was filtered off and washed with ethyl acetate. The filtrate was concentrated under reduced pressure and the residue was purified through column chromatography on silica gel using hexane and ethyl acetate (10:1-5:1) as eluent to obtain the desired product as a colorless sticky liquid 565 mg in 83% yield. <sup>1</sup>H NMR (DMSO-*d*<sub>6</sub>, 400 MHz): δ 7.39 (t, *J* = 7.6 Hz, 2H), 7.52 (dd, *J* = 8.0, 0.8 Hz, 2H), 7.66 (d, *J* = 8.4 Hz, 2H), 7.83 (dd, *J* = 5.6, 0.8 Hz, 1H), 7.94 (d, *J* = 2.0 Hz, 1H), 8.29 (d, *J* = 8.0 Hz, 2H), 8.69 (d, *J* = 5.6 Hz, 1H).

### General procedure for the synthesis of ligands with a substitute on the pyridine ring:

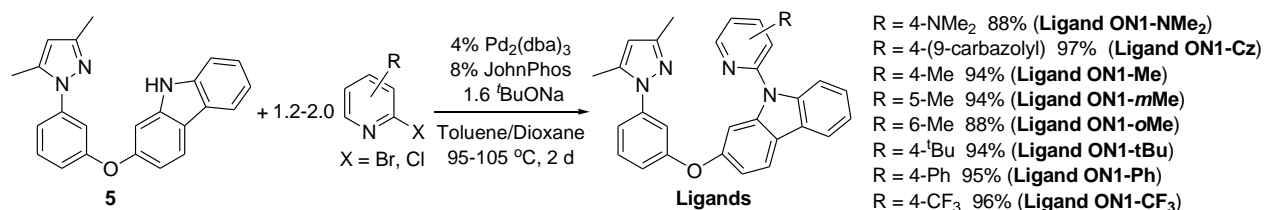

To a dry pressure Schlenk tube equipped with a magnetic stir bar, added 2-(3-(3,5-dimethyl-1*H*-pyrazol-1-yl)phenoxy)-9*H*-carbazole **5** (1.0 eq, **5** was prepared according our reported literature.<sup>S3</sup>), 2-bromo(chloro)pyridin derivative (1.2-2.0 eq, if it is a solid), Pd<sub>2</sub>(dba)<sub>3</sub> (0.04 eq), JohnPhos (0.08 eq) and <sup>t</sup>BuONa (1.6 eq). The tube was evacuated and back-filled with nitrogen and this evacuation/back-fill procedure was repeated for another twice. Then the solvents toluene (4 mL/mmol **5**), dioxane (4 mL/mmol **5**) and 2-bromo(chloro)pyridin derivative (1.2-2.0 eq, if it is a liquid) were added under the protection of nitrogen. The tube was sealed and the mixture was stirred in an oil bath at a temperature of 95-105°C for 2 days. Then the mixture was cooled down to ambient temperature. The solvent was removed under reduced pressure and the residue was

purified through column chromatography on silica gel using hexane/ethyl acetate as eluent to obtain the desired product.

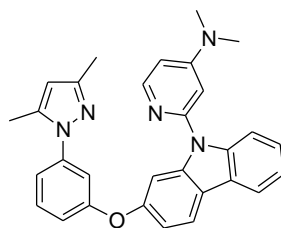

Ligand ON1-NMe<sub>2</sub>

2-(3-(3,5-Dimethyl-1*H*-pyrazol-1-yl)phenoxy)-9*H*-carbazole **5** (530 mg, 1.5 mmol, 1.0 eq) reacted with 2-bromo-4-*N,N*-dimethylaminopyridine (362 mg, 1.8 mmol, 1.2 eq) as the general procedure. Purification of the crude product by flash chromatography on silica gel (eluent: hexane/ethyl acetate = 3:1-2:1-1:1) afforded the title compound as a colorless solid 624 mg in 88% yield. <sup>1</sup>H NMR (DMSO-*d*<sub>6</sub>, 400 MHz): δ 2.10 (s, 3H), 2.23 (s, 3H), 2.94 (s, 6H), 5.99 (s, 1H), 6.63 (dd, *J* = 6.0, 1.6 Hz, 1H), 6.74 (d, *J* = 1.6 Hz, 1H), 7.02-7.07 (m, 2H), 7.12 (s, 1H), 7.22 (d, *J* = 8.0 Hz, 1H), 7.27 (t, *J* = 7.6 Hz, 1H), 7.37-7.46 (m, 3H), 7.74 (d, *J* = 8.4 Hz, 1H), 8.15-8.17 (m, 2H), 8.22 (d, *J* = 2.0 Hz, 1H). <sup>13</sup>C NMR (DMSO-*d*<sub>6</sub>, 100 MHz): δ 12.23, 13.22, 38.89, 101.14, 102.07, 105.77, 107.49, 111.33, 112.71, 113.49, 116.46, 118.27, 119.63, 119.99, 120.64, 121.63, 122.92, 125.70, 130.38, 139.21, 139.73, 140.24, 140.97, 148.07, 148.90, 151.08, 154.84, 156.09, 157.86.

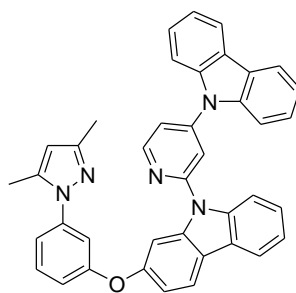

Ligand ON1-Cz

2-(3-(3,5-Dimethyl-1*H*-pyrazol-1-yl)phenoxy)-9*H*-carbazole **5** (589 mg, 1.66 mmol, 1.0 eq) reacted with 9-(2-chloropyridin-4-yl)-9*H*-carbazole (560 mg, 2.0 mmol, 1.2 eq) as the general procedure. Purification of the crude product by flash chromatography on silica gel (eluent: hexane/ethyl acetate = 10:1-3:1) afforded the title compound as a brown solid 958 mg in 97% yield. <sup>1</sup>H NMR (DMSO-*d*<sub>6</sub>, 400 MHz): δ 2.07 (s, 3H), 2.17 (s, 3H), 5.95 (s, 1H), 7.01 (dd, *J* = 7.6,



2.4 Hz, 1H), 7.06-7.09 (m, 2H), 7.15-7.18 (m, 1H), 7.27-7.32 (m, 3H), 7.35-7.43 (m, 4H), 7.67 (d,  $J = 8.4$  Hz, 2H), 7.72 (d,  $J = 2.0$  Hz, 1H), 7.75 (dd,  $J = 5.6, 2.0$  Hz, 1H), 7.89 (d,  $J = 8.8$  Hz, 1H), 7.91 (d,  $J = 2.0$  Hz, 1H), 8.17-8.21 (m, 3H), 8.24 (d,  $J = 8.8$  Hz, 1H), 8.87 (d,  $J = 5.6$  Hz, 1H).  $^{13}\text{C}$  NMR (DMSO- $d_6$ , 100 MHz):  $\delta$  12.16, 13.21, 103.03, 107.44, 110.16, 111.38, 113.08, 113.63, 115.07, 116.06, 118.16, 118.73, 120.21, 120.33, 120.65, 121.18, 121.45, 121.76, 123.49, 123.63, 126.08, 126.57, 130.35, 138.94, 139.16, 139.38, 140.04, 140.93, 147.11, 148.04, 151.38, 152.44, 154.68, 158.04.

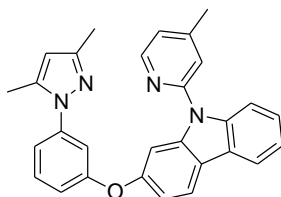

**Ligand ON1-Me**

2-(3-(3,5-Dimethyl-1H-pyrazol-1-yl)phenoxy)-9H-carbazole **5** (530 mg, 1.5 mmol, 1.0 eq) reacted with 2-bromo-4-methylpyridine (387 mg, 2.25 mmol, 1.5 eq) as the general procedure. Purification of the crude product by flash chromatography on silica gel (eluent: hexane/ethyl acetate = 10:1-4:1) afforded the title compound as a colorless solid 628 mg in 94% yield.  $^1\text{H}$  NMR (DMSO- $d_6$ , 400 MHz):  $\delta$  2.14 (s, 3H), 2.28 (s, 3H), 2.46 (s, 3H), 6.05 (s, 1H), 7.06 (dd,  $J = 8.0, 2.4$  Hz, 1H), 7.09-7.13 (m, 2H), 7.26 (dt,  $J = 8.0, 1.2$  Hz, 1H), 7.31 (d,  $J = 5.2$  Hz, 1H), 7.35 (t,  $J = 7.2$  Hz, 1H), 7.44-7.52 (m, 3H), 7.61 (s, 1H), 7.78 (d,  $J = 8.0$ , 1H), 8.24 (d,  $J = 8.0$  Hz, 1H), 8.29 (d,  $J = 8.8$  Hz, 1H), 8.53 (d,  $J = 4.8$  Hz, 1H).  $^{13}\text{C}$  NMR (DMSO- $d_6$ , 100 MHz):  $\delta$  12.22, 13.22, 20.58, 102.38, 107.48, 111.18, 113.15, 113.29, 116.34, 118.25, 119.48, 119.91, 120.15, 121.12, 121.76, 123.14, 123.16, 125.92, 130.39, 139.24, 139.38, 139.98, 140.93, 148.07, 149.07, 150.47, 150.70, 154.79, 157.90.

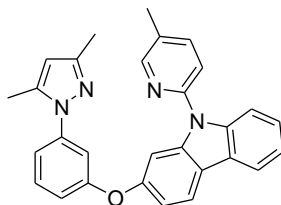

**Ligand ON1-mMe**

2-(3-(3,5-Dimethyl-1*H*-pyrazol-1-yl)phenoxy)-9*H*-carbazole **5** (353 mg, 1.0 mmol, 1.0 eq) reacted with 2-bromo-5-methylpyridine (258 mg, 1.5 mmol, 1.5 eq) as the general procedure. Purification of the crude product by flash chromatography on silica gel (eluent: hexane/ethyl acetate = 10:1-5:1) afforded the title compound as a colorless solid 420 mg in 94% yield. <sup>1</sup>H NMR (DMSO-*d*<sub>6</sub>, 400 MHz): δ 2.12 (s, 3H), 2.25 (s, 3H), 2.39 (s, 3H), 6.03 (s, 1H), 7.04 (dd, *J* = 8.0, 2.4 Hz, 1H), 7.07-7.11 (m, 2H), 7.23 (dd, *J* = 8.0, 2.0 Hz, 1H), 7.32 (t, *J* = 7.6 Hz, 1H), 7.41-7.49 (m, 3H), 7.66 (d, *J* = 8.4 Hz, 1H), 7.71 (d, *J* = 8.0, 1H), 7.89 (dd, *J* = 8.0, 2.0 Hz, 1H), 8.22 (d, *J* = 7.2 Hz, 1H), 8.27 (d, *J* = 8.0 Hz, 1H), 8.50 (d, *J* = 2.0 Hz, 1H). <sup>13</sup>C NMR (DMSO-*d*<sub>6</sub>, 125 MHz): δ 12.21, 13.23, 17.48, 102.16, 107.49, 110.95, 113.14, 113.26, 116.28, 118.26, 118.64, 119.87, 120.19, 121.04, 121.80, 123.07, 125.92, 130.42, 131.64, 139.25, 139.49, 139.79, 140.05, 140.92, 148.09, 148.10, 149.50, 154.74, 157.95.

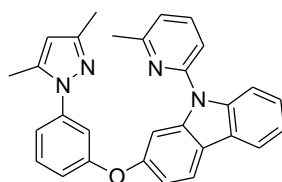

Ligand ON1-oMe

2-(3-(3,5-Dimethyl-1*H*-pyrazol-1-yl)phenoxy)-9*H*-carbazole **5** (475 mg, 1.34 mmol, 1.0 eq) reacted with 2-bromo-6-methylpyridine (461 mg, 2.68 mmol, 2.0 eq) as the general procedure. Purification of the crude product by flash chromatography on silica gel (eluent: hexane/ethyl acetate = 10:1-5:1) afforded the title compound as a brown solid 526 mg in 88% yield. <sup>1</sup>H NMR (DMSO-*d*<sub>6</sub>, 400 MHz): δ 2.11 (s, 3H), 2.24 (s, 3H), 2.48 (s, 3H), 6.02 (s, 1H), 7.07 (td, *J* = 8.0, 2.4 Hz, 2H), 7.14 (t, *J* = 2.0 Hz, 1H), 7.24-7.29 (m, 2H), 7.32 (t, *J* = 7.2 Hz, 1H), 7.43 (t, *J* = 7.2 Hz, 1H), 7.48 (t, *J* = 8.0 Hz, 1H), 7.51 (d, *J* = 2.0, 1H), 7.54 (d, *J* = 8.0 Hz, 1H), 7.76 (d, *J* = 8.0 Hz, 1H), 7.93 (d, *J* = 8.0 Hz, 1H), 8.20 (d, *J* = 7.6 Hz, 1H), 8.25 (d, *J* = 8.0 Hz, 1H). <sup>13</sup>C NMR (DMSO-*d*<sub>6</sub>, 100 MHz): δ 12.23, 13.23, 23.82, 102.00, 107.51, 111.15, 112.98, 113.68, 115.74, 116.72, 118.42, 119.75, 120.14, 121.13, 121.28, 121.71, 123.23, 125.88, 130.42, 139.23, 139.30, 139.60, 139.93, 140.97, 148.10, 149.75, 155.13, 157.62, 158.34.

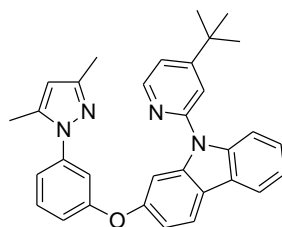

Ligand ON1-tBu

Ligand ON1tBu was prepared according our reported literature.<sup>S2</sup> 2-(3-(3,5-Dimethyl-1*H*-pyrazol-1-yl)phenoxy)-9*H*-carbazole **5** (530 mg, 1.5 mmol, 1.0 eq) reacted with 2-bromo-4-*tert*-butylpyridine (642 mg, 3.0 mmol, 2.0 eq) as the general procedure. Purification of the crude product by flash chromatography on silica gel (eluent: hexane/ethyl acetate = 10:1-5:1) afforded the title compound as a brown solid 685 mg in 94% yield. <sup>1</sup>H NMR (DMSO-*d*<sub>6</sub>, 400 MHz): δ 1.26 (s, 9H), 2.11 (s, 3H), 2.23 (s, 3H), 6.00 (s, 1H), 7.06-7.08 (m, 1H), 7.10 (dd, *J* = 8.0, 2.4 Hz, 1H), 7.14 (t, *J* = 2.4 Hz, 1H), 7.24-7.26 (m, 1H), 7.31 (t, *J* = 7.2 Hz, 1H), 7.38 (d, *J* = 2.0 Hz, 1H), 7.41-7.48 (m, 3H), 7.61 (d, *J* = 1.6, 1H), 7.74 (d, *J* = 8.4 Hz, 1H), 8.20 (d, *J* = 8.0 Hz, 1H), 8.26 (d, *J* = 8.8 Hz, 1H), 8.55 (d, *J* = 4.8 Hz, 1H). <sup>13</sup>C NMR (DMSO-*d*<sub>6</sub>, 100 MHz): δ 12.21, 13.22, 30.01, 34.81, 101.37, 107.50, 111.11, 113.01, 113.81, 115.78, 116.80, 118.49, 119.27, 119.72, 120.13, 121.11, 121.83, 123.20, 125.90, 130.45, 139.19, 139.43, 139.94, 141.01, 148.07, 149.37, 150.60, 155.32, 157.50, 163.03.

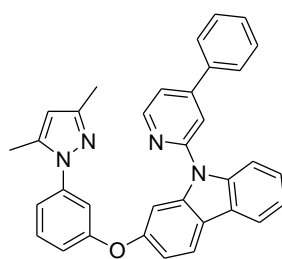

Ligand ON1-Ph

2-(3-(3,5-Dimethyl-1*H*-pyrazol-1-yl)phenoxy)-9*H*-carbazole **5** (530 mg, 1.5 mmol, 1.0 eq) reacted with 2-chloro-4-phenylpyridine (342 mg, 1.8 mmol, 1.2 eq) as the general procedure. Purification of the crude product by flash chromatography on silica gel (eluent: hexane/ethyl acetate = 10:1-5:1-3:1) afforded the title compound as a brown solid 725 mg in 95% yield. <sup>1</sup>H NMR (DMSO-*d*<sub>6</sub>, 400 MHz): δ 2.13 (s, 3H), 2.25 (s, 3H), 6.04 (s, 1H), 7.10 (dd, *J* = 8.0, 2.4 Hz, 1H), 7.12-7.15 (m, 2H), 7.25-7.27 (m, 1H), 7.37 (t, *J* = 7.6 Hz, 1H), 7.46-7.57 (m, 6H), 7.79 (dd, *J* = 4.8, 1.6, 1H), 7.85-7.88 (m, 3H), 8.00 (d, *J* = 0.4 Hz, 1H), 8.26 (d, *J* = 7.6 Hz, 1H), 8.31 (d, *J* = 8.8 Hz, 1H), 8.74 (d, *J* = 5.2 Hz, 1H). <sup>13</sup>C NMR (DMSO-*d*<sub>6</sub>, 100 MHz): δ 12.19, 13.21, 102.13,

107.49, 111.22, 113.20, 113.58, 116.14, 116.49, 118.33, 119.73, 119.95, 120.14, 121.23, 121.77, 123.29, 126.01, 127.10, 129.20, 129.62, 130.37, 136.62, 139.19, 139.44, 140.01, 140.98, 148.06, 150.08, 150.46, 151.29, 155.08, 157.76.

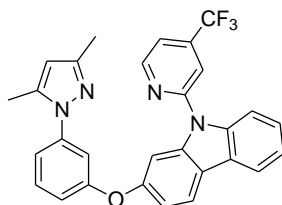

Ligand ON1-CF<sub>3</sub>

2-(3-(3,5-Dimethyl-1*H*-pyrazol-1-yl)phenoxy)-9*H*-carbazole **5** (707 mg, 2.0 mmol, 1.0 eq) reacted with 2-bromo-4-(trifluoromethyl)pyridine (904 mg, 4.0 mmol, 2.0 eq) as the general procedure. Purification of the crude product by flash chromatography on silica gel (eluent: hexane/ethyl acetate = 10:1-5:1) afforded the title compound as a brown solid 962 mg in 96% yield. <sup>1</sup>H NMR (DMSO-*d*<sub>6</sub>, 400 MHz): δ 2.13 (s, 3H), 2.26 (s, 3H), 6.04 (s, 1H), 7.08 (dd, *J* = 8.0, 2.4 Hz, 1H), 7.12-7.15 (m, 2H), 7.25-7.27 (m, 1H), 7.38 (t, *J* = 7.6 Hz, 1H), 7.48 (t, *J* = 8.0 Hz, 2H), 7.58 (d, *J* = 1.6 Hz, 1H), 7.81-7.83 (m, 2H), 8.10 (s, 1H), 8.25 (d, *J* = 7.6 Hz, 1H), 8.30 (d, *J* = 8.8 Hz, 1H), 8.95 (d, *J* = 4.8 Hz, 1H). <sup>13</sup>C NMR (DMSO-*d*<sub>6</sub>, 100 MHz): δ 12.16, 13.18, 102.47, 107.46, 111.09, 113.43, 113.71, 114.52 (q, *J* = 3.9 Hz), 116.37, 117.37 (q, *J* = 2.7 Hz), 118.32, 120.25, 121.77, 121.81, 122.55 (q, *J* = 272.5 Hz), 123.59, 126.16, 130.35, 139.09, 139.19, 139.56 (q, *J* = 34.7 Hz), 139.73, 140.98, 148.06, 151.32, 151.53, 155.05, 157.75. <sup>19</sup>F NMR (DMSO-*d*<sub>6</sub>, 376 MHz): δ -63.32.

$^1\text{H}$  NMR spectrum of **Ligand ON1** at 400 MHz instrument in  $\text{DMSO}-d_6$  solution:

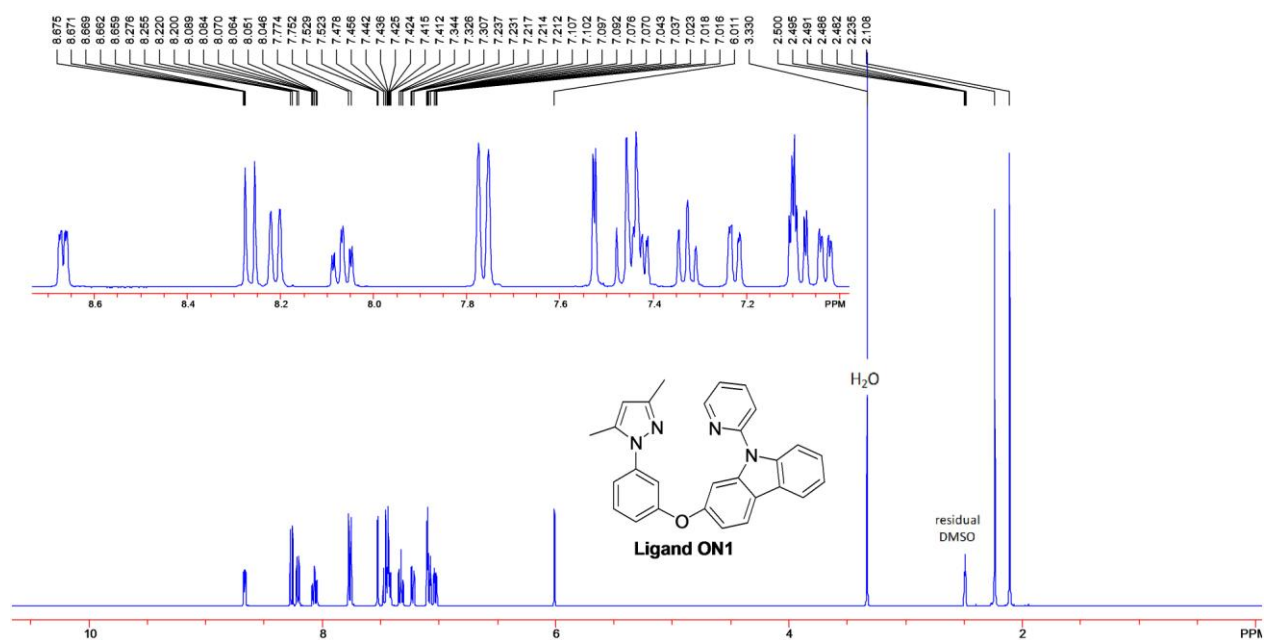

$^{13}\text{C}$  NMR spectrum of **Ligand ON1** at 100 MHz instrument in  $\text{DMSO}-d_6$  solution:

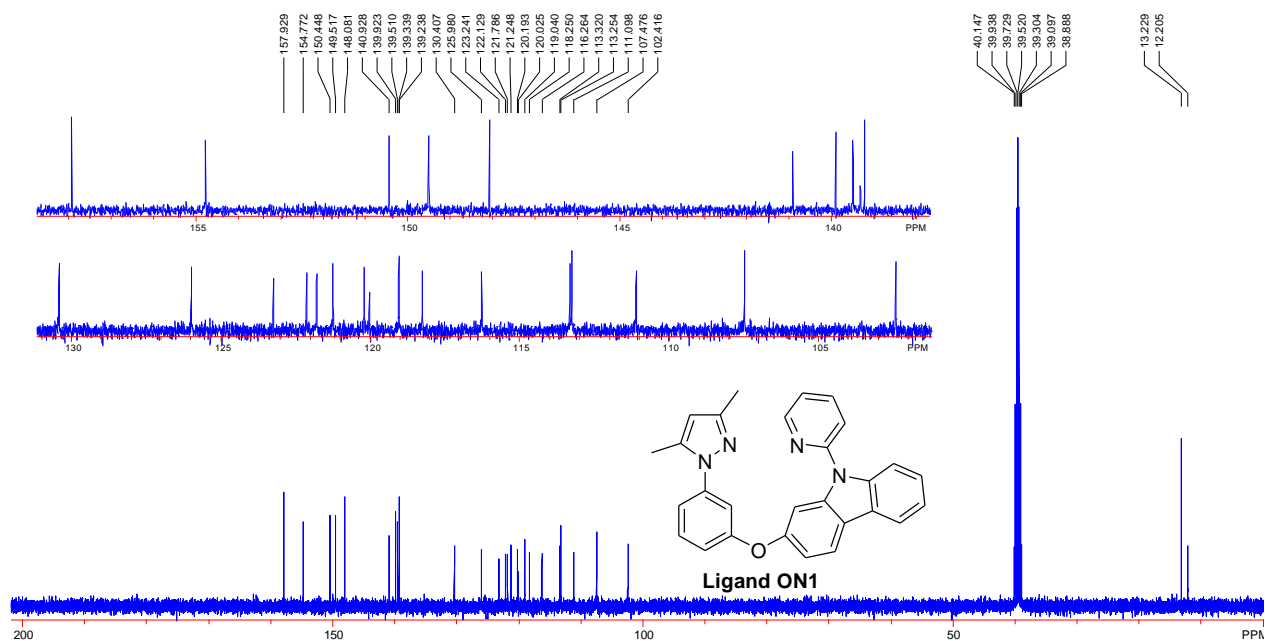

$^1\text{H}$  NMR spectrum of **Ligand ON1-NMe<sub>2</sub>** at 400 MHz instrument in DMSO-*d*<sub>6</sub> solution:

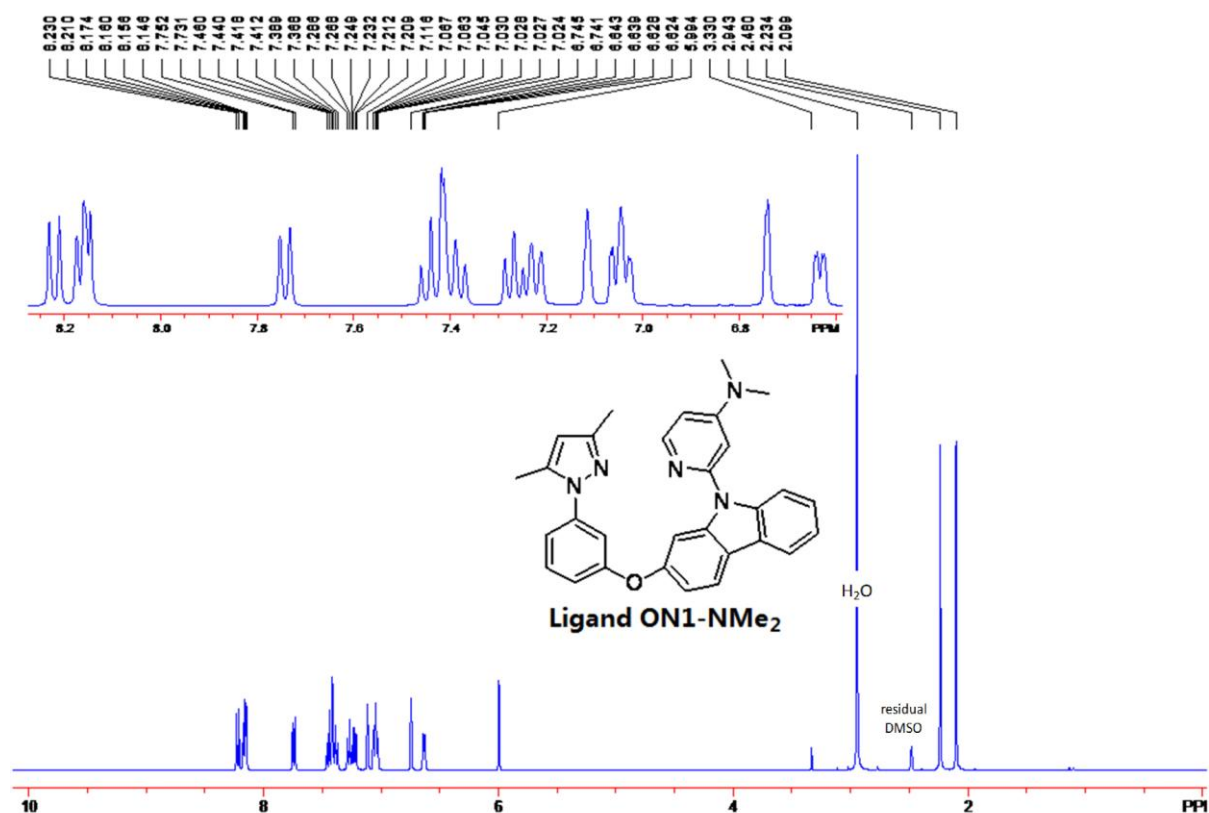

$^{13}\text{C}$  NMR spectrum of **Ligand ON1-NMe<sub>2</sub>** at 100 MHz instrument in DMSO-*d*<sub>6</sub> solution:

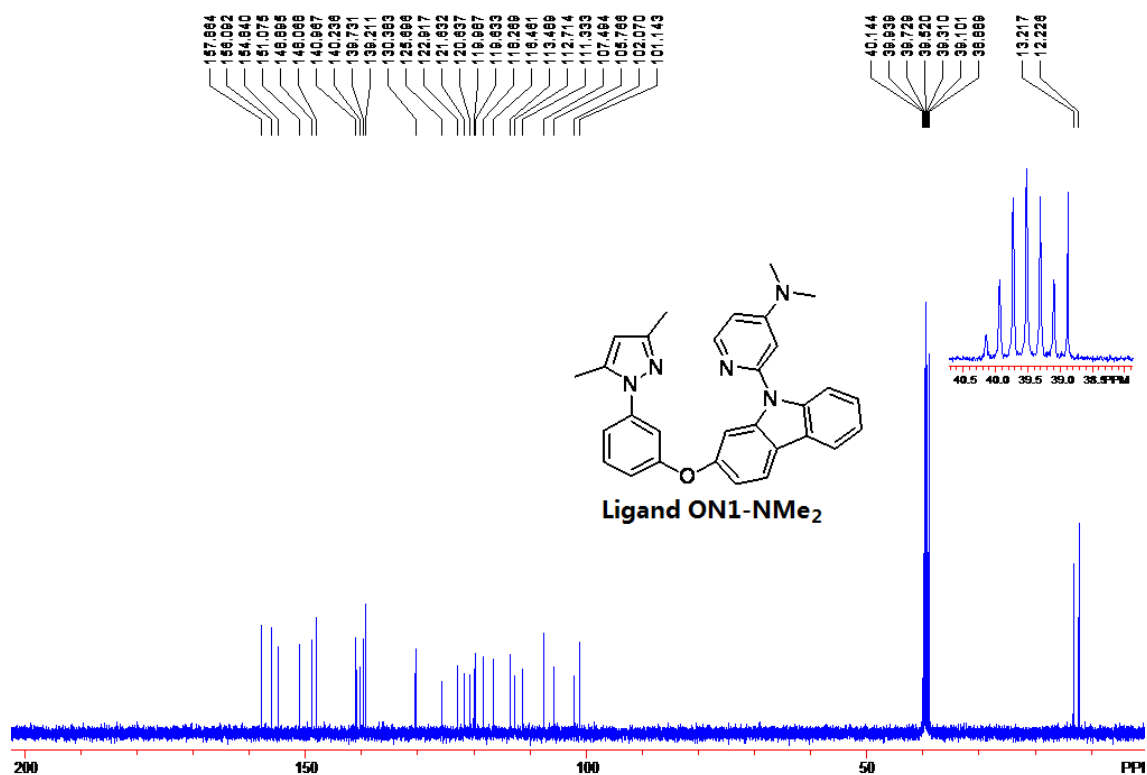

$^1\text{H}$  NMR spectrum of **Ligand ON1-Cz** at 400 MHz instrument in  $\text{DMSO}-d_6$  solution:

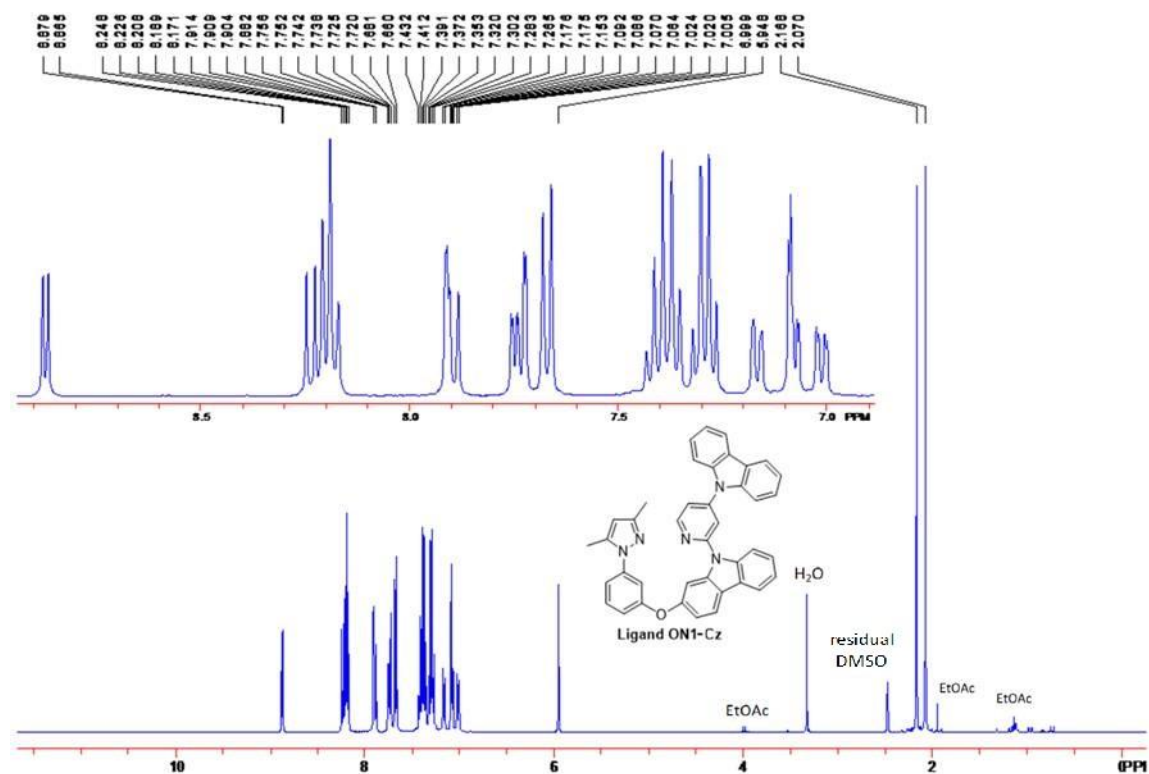

$^{13}\text{C}$  NMR spectrum of **Ligand ON1-Cz** at 100 MHz instrument in  $\text{DMSO}-d_6$  solution:

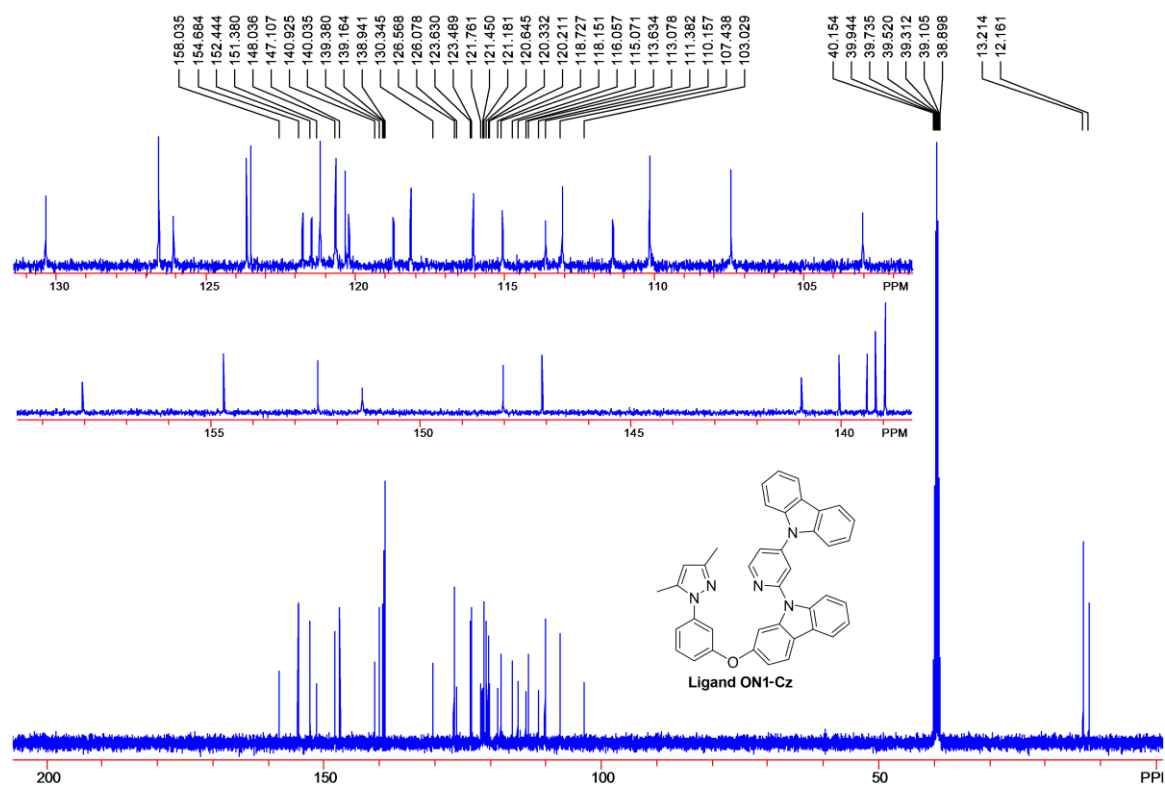

$^1\text{H}$  NMR spectrum of **Ligand ON1-Me** at 400 MHz instrument in  $\text{DMSO}-d_6$  solution:

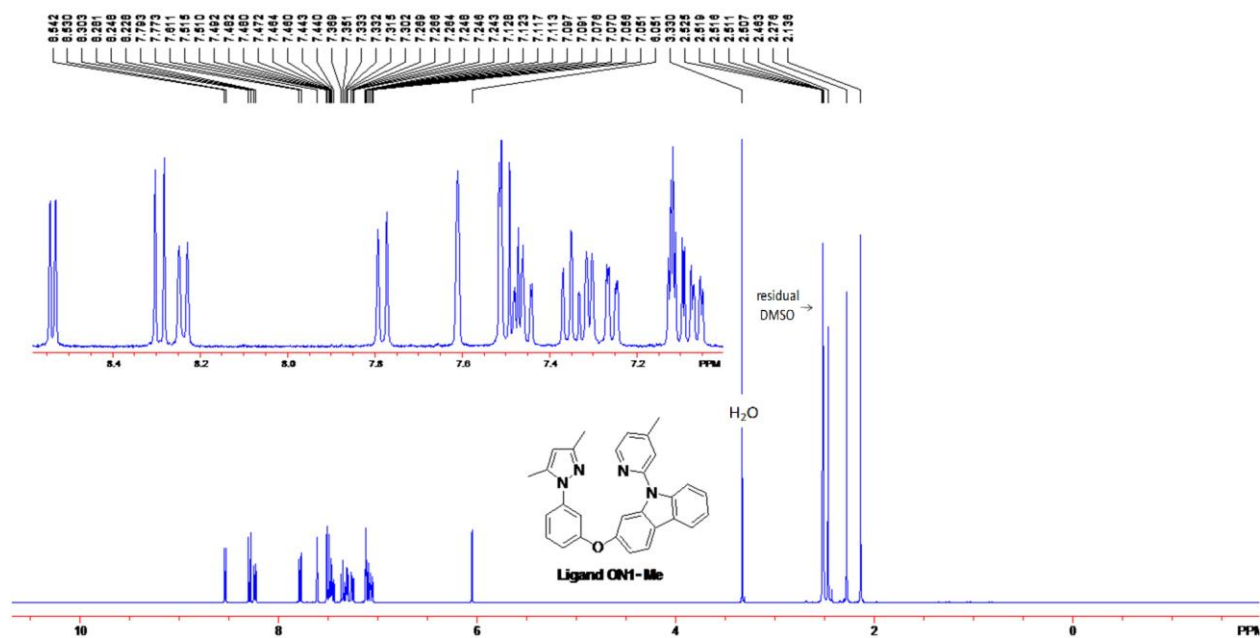

$^{13}\text{C}$  NMR spectrum of **Ligand ON1-Me** at 100 MHz instrument in  $\text{DMSO}-d_6$  solution:

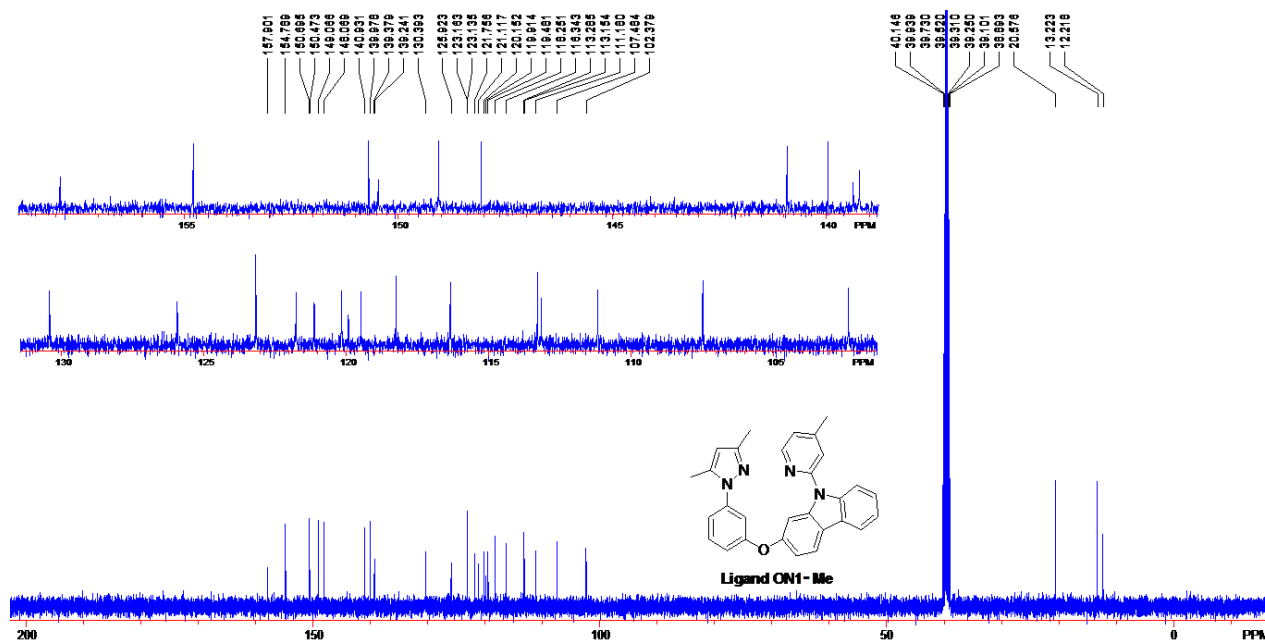



$^1\text{H}$  NMR spectrum of **Ligand ON1-*m*Me** at 400 MHz instrument in  $\text{DMSO-}d_6$  solution:

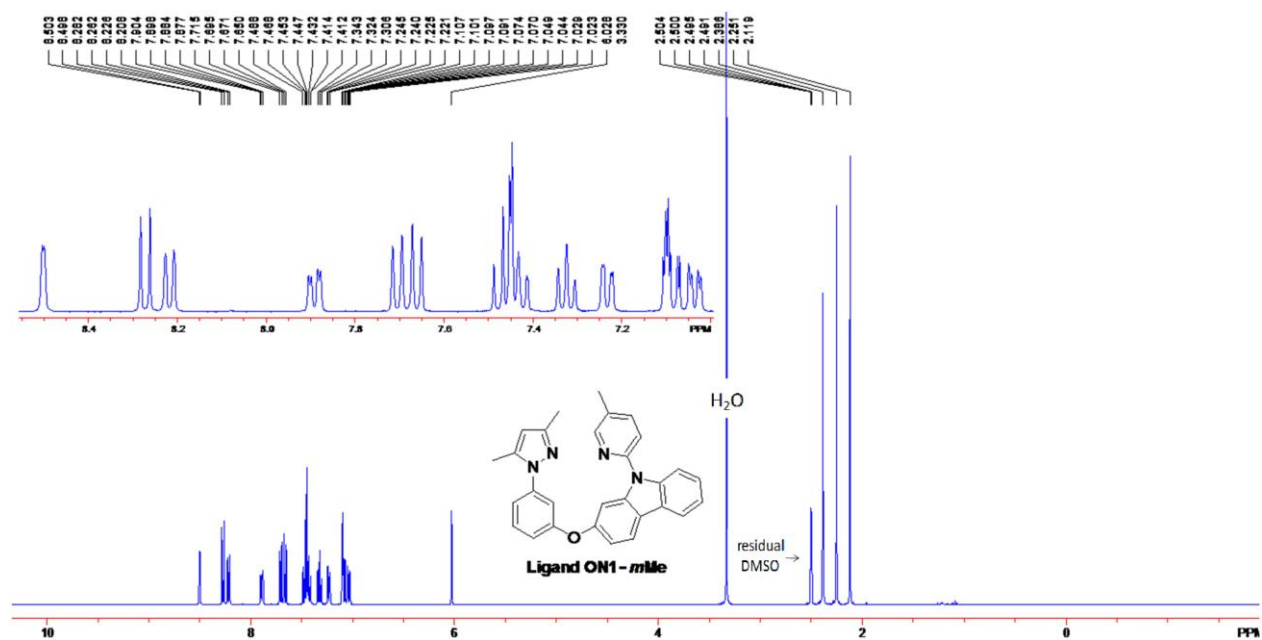

$^{13}\text{C}$  NMR spectrum of **Ligand ON1-*m*Me** at 125 MHz instrument in  $\text{DMSO-}d_6$  solution:

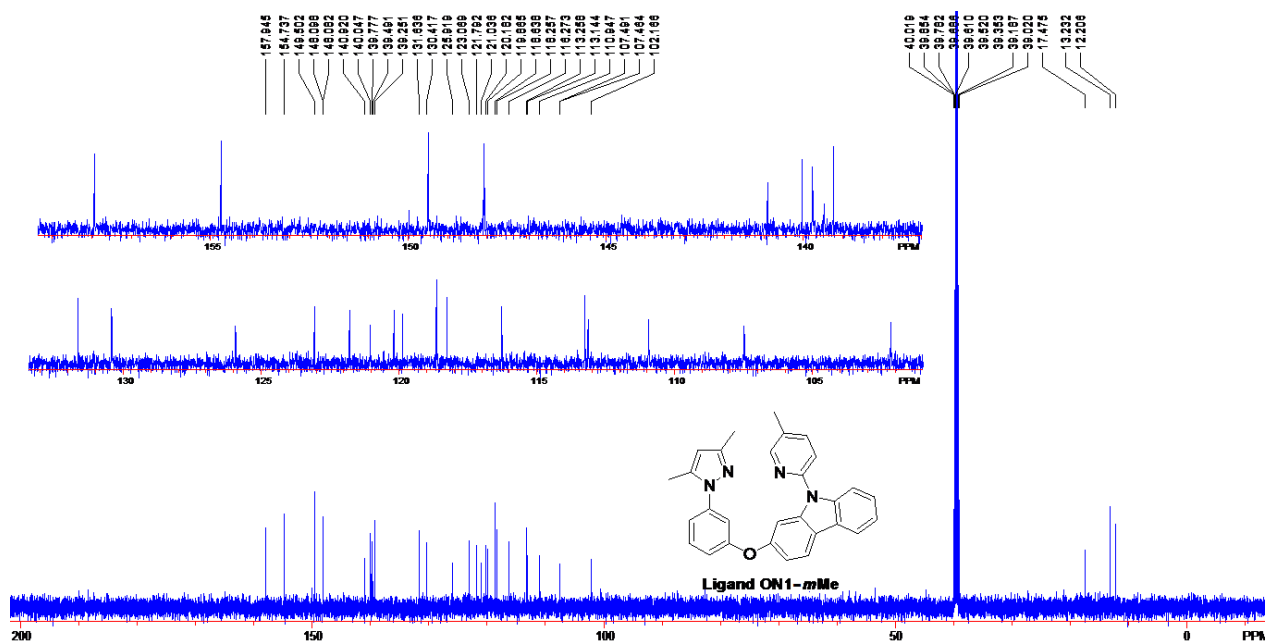

[illegible]

169.343  
167.822  
155.128  
149.789  
148.101  
140.872  
138.624  
138.516  
138.303  
138.227  
130.423  
125.882  
123.234  
121.712  
121.281  
121.133  
120.137  
119.750  
118.422  
118.124  
115.731  
113.877  
112.878  
111.148  
107.812  
102.001

40.148  
39.838  
39.730  
39.660  
39.520  
39.469  
39.311  
39.094  
38.898  
23.819  
13.234  
12.230

169  
160  
150  
140  
130  
120  
110  
100  
90  
80  
70  
60  
50  
40  
30  
20  
10  
0  
PPM

130  
125  
120  
115  
110  
105  
PPM

200  
150  
100  
50  
0  
PPM

Ligand ON1-otile

**Ligand ON1-tBu**

163.027  
157.504  
155.323  
150.604  
148.387  
146.066  
141.010  
139.638  
138.425  
136.185  
130.452  
128.697  
123.197  
121.826  
121.108  
120.127  
118.721  
118.274  
118.484  
116.602  
115.778  
113.608  
113.010  
111.112  
107.501  
101.370

40.152  
39.944  
39.728  
39.520  
39.312  
39.104  
38.894  
38.673  
38.014  
13.220  
13.208

$^1\text{H}$  NMR spectrum of **Ligand ON1-Ph** at 400 MHz instrument in  $\text{DMSO}-d_6$  solution:

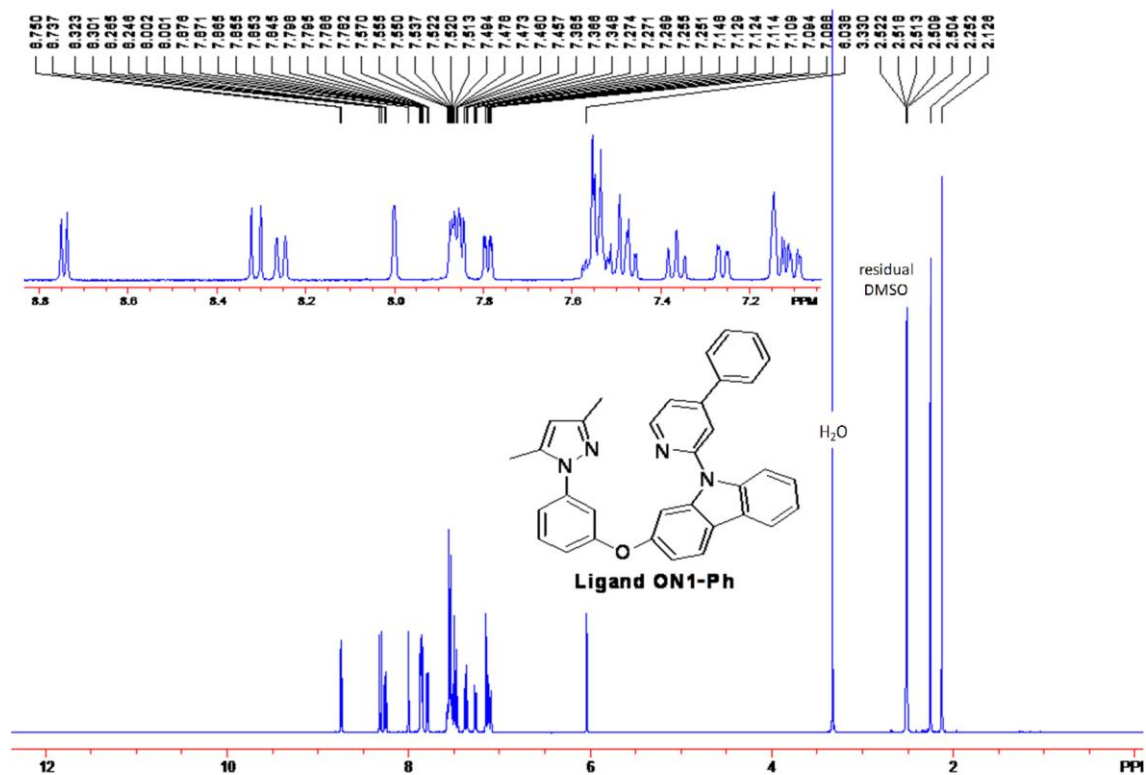

$^{13}\text{C}$  NMR spectrum of **Ligand ON1-Ph** at 100 MHz instrument in  $\text{DMSO}-d_6$  solution:

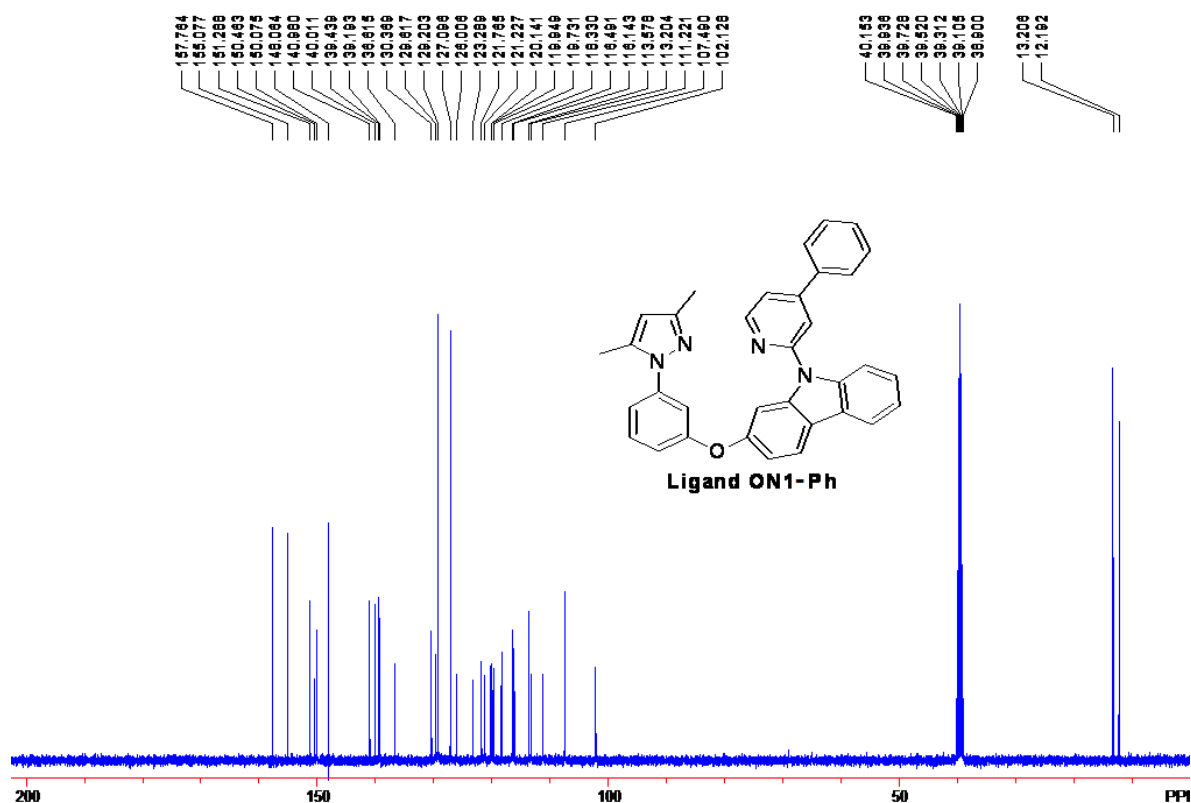

$^1\text{H}$  NMR spectrum of **Ligand ON1-CF<sub>3</sub>** at 400 MHz instrument in DMSO-*d*<sub>6</sub> solution:

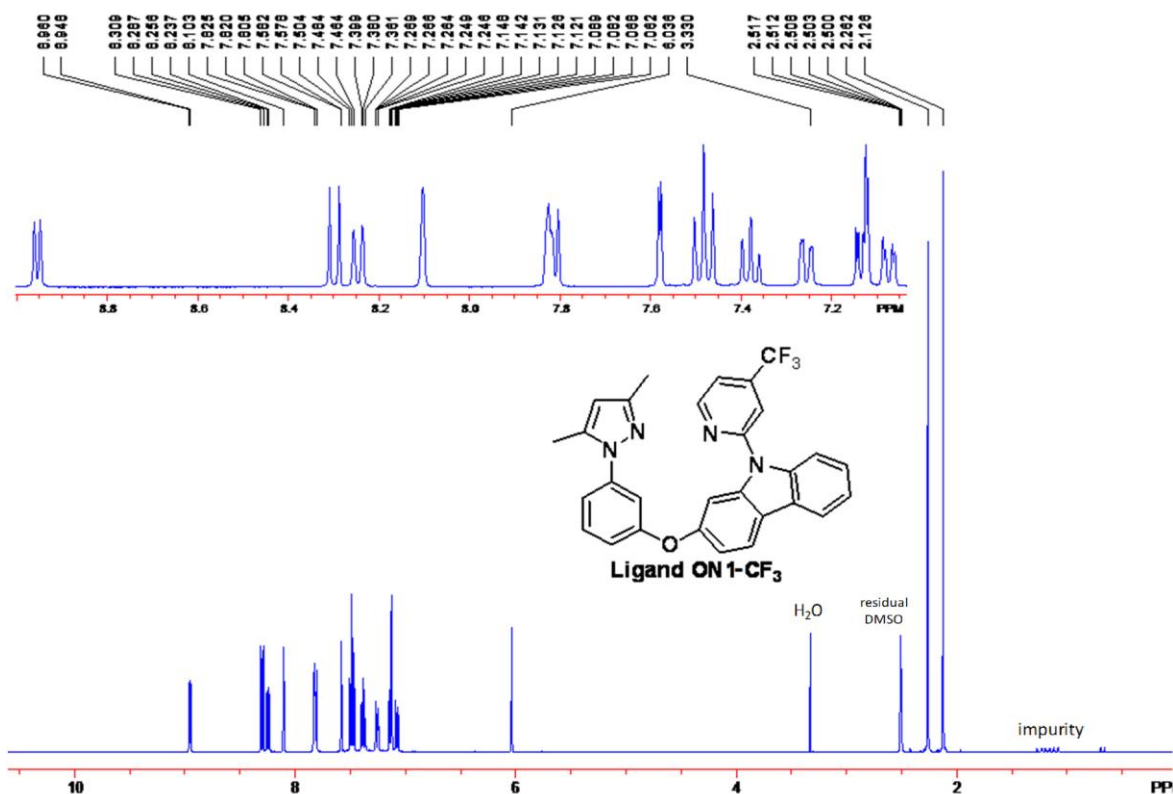

$^{13}\text{C}$  NMR spectrum of **Ligand ON1-CF<sub>3</sub>** at 100 MHz instrument in DMSO-*d*<sub>6</sub> solution:

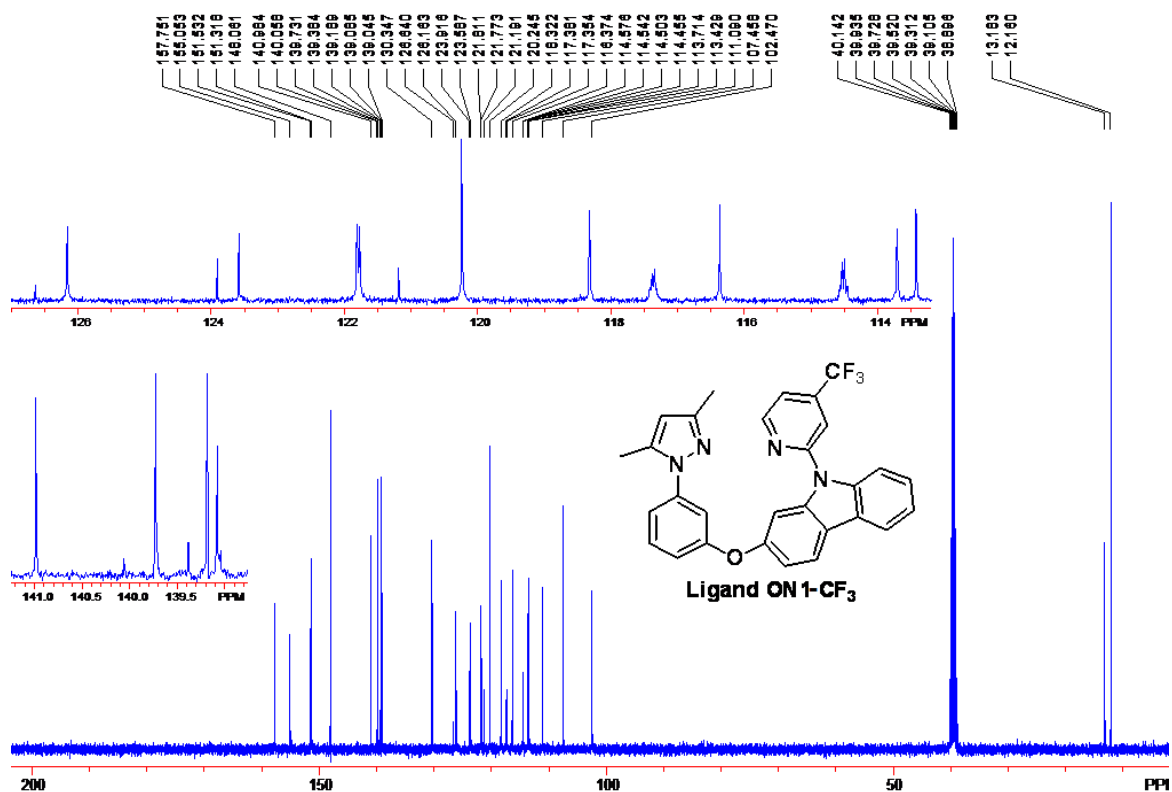

$^{19}\text{F}$  NMR spectrum of **Ligand ON1-CF<sub>3</sub>** at 376 MHz instrument in DMSO-*d*<sub>6</sub> solution:

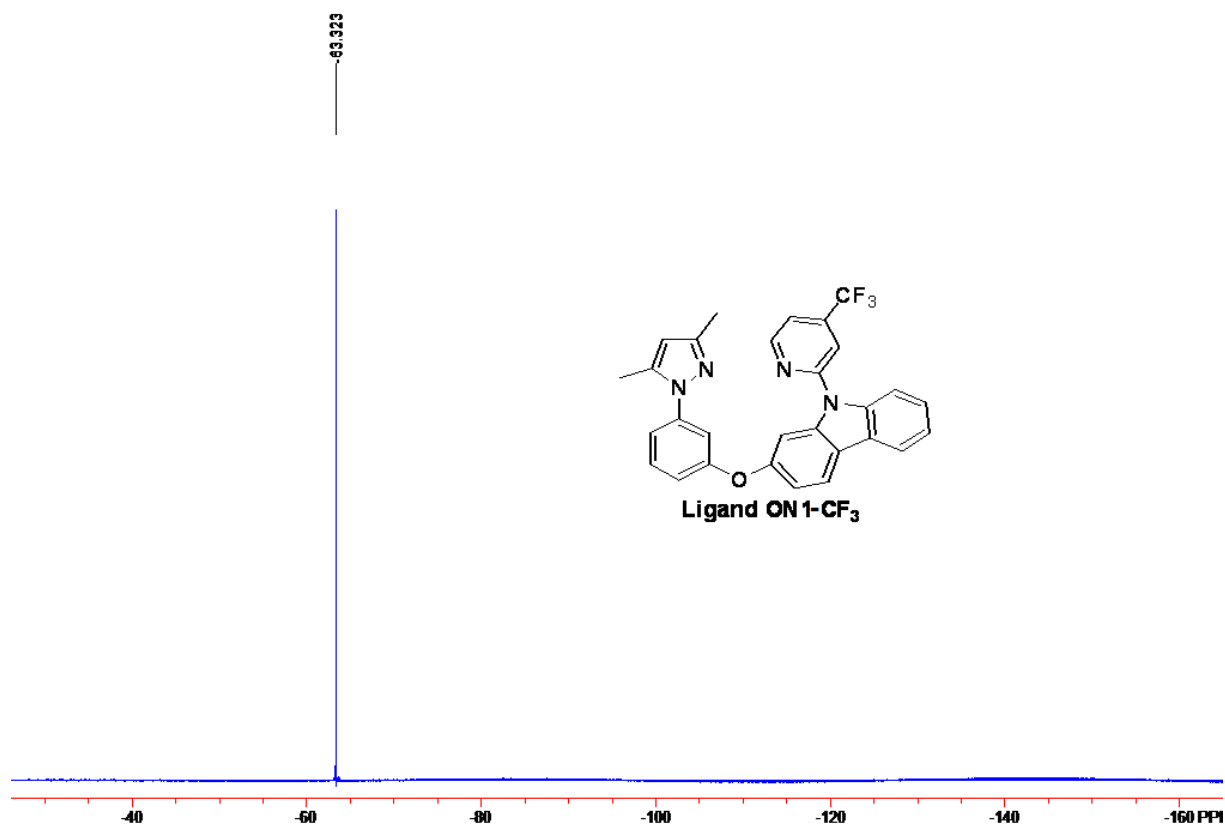

$^1\text{H}$  NMR spectrum of **PtON1** at 400 MHz instrument in DMSO-*d*<sub>6</sub> solution:

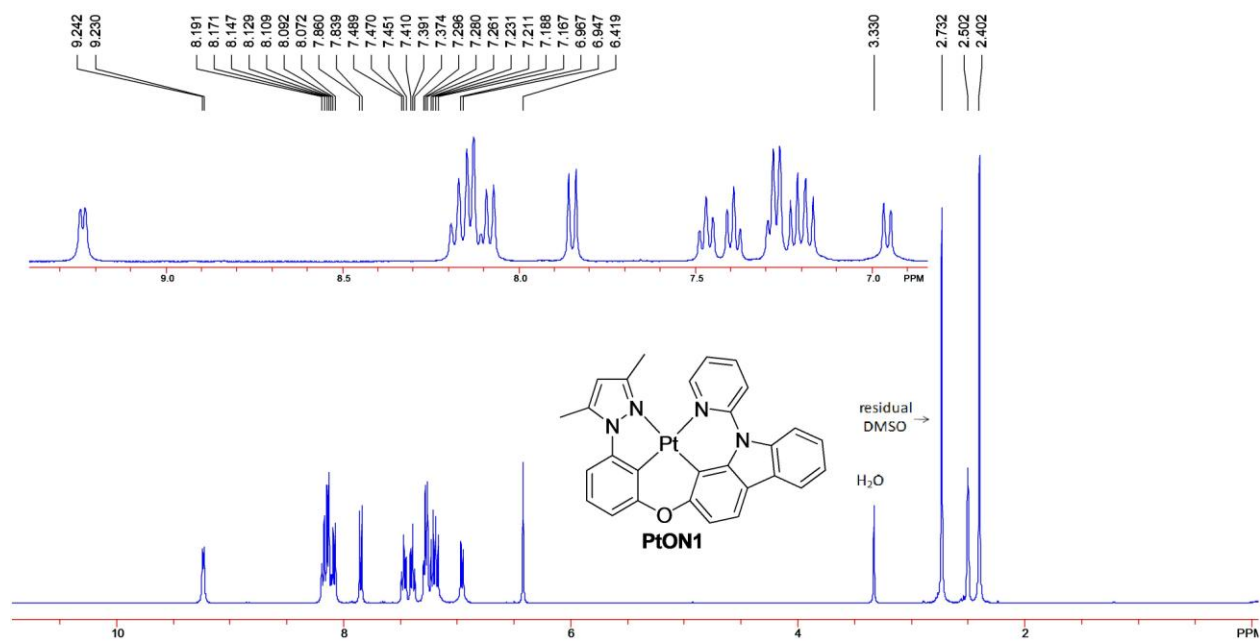

$^{13}\text{C}$  NMR spectrum of **PtON1** at 100 MHz instrument in  $\text{DMSO-}d_6$  solution:

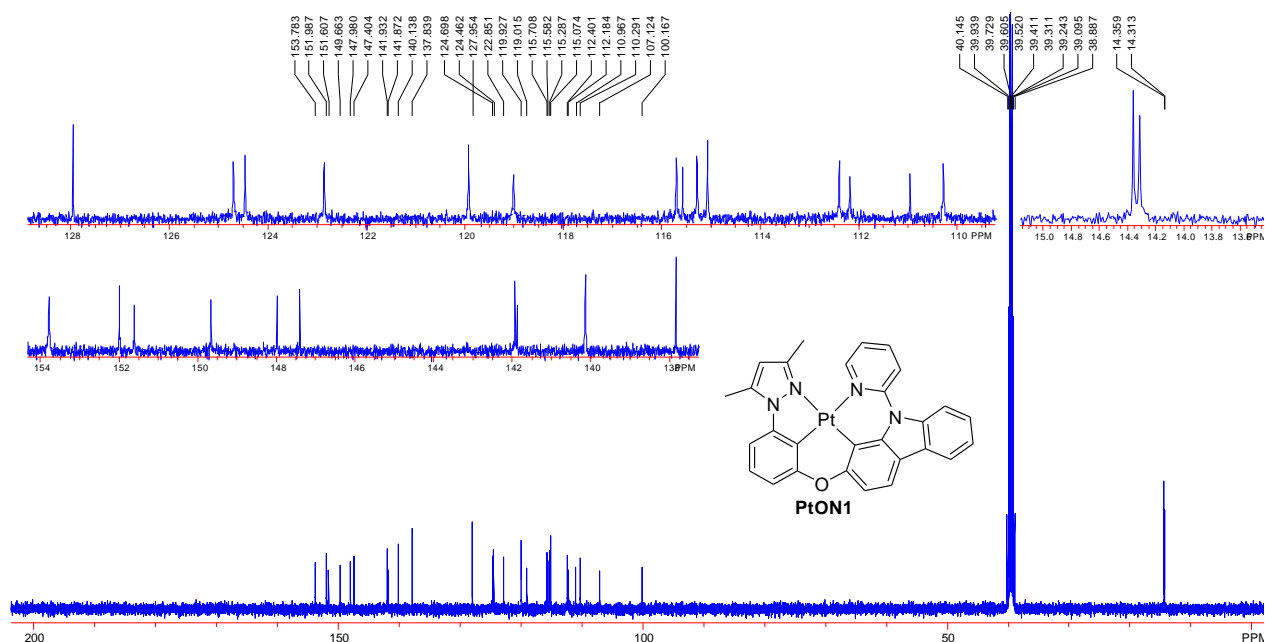

$^1\text{H}$  NMR spectrum of **PtON1-NMe<sub>2</sub>** at 400 MHz instrument in  $\text{DMSO-}d_6$  solution:

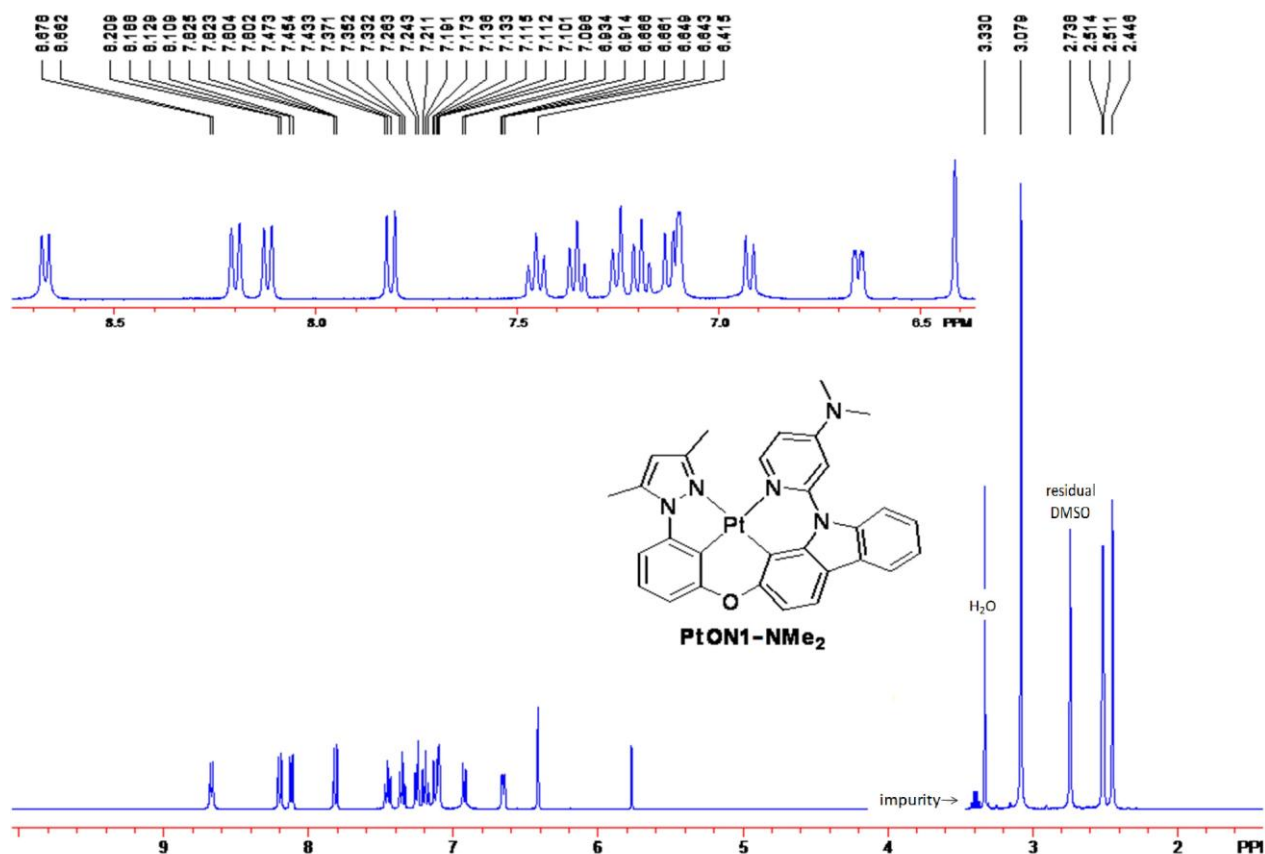

$^{13}\text{C}$  NMR spectrum of **PtON1** at 100 MHz instrument in  $\text{CD}_2\text{Cl}_2$  solution:

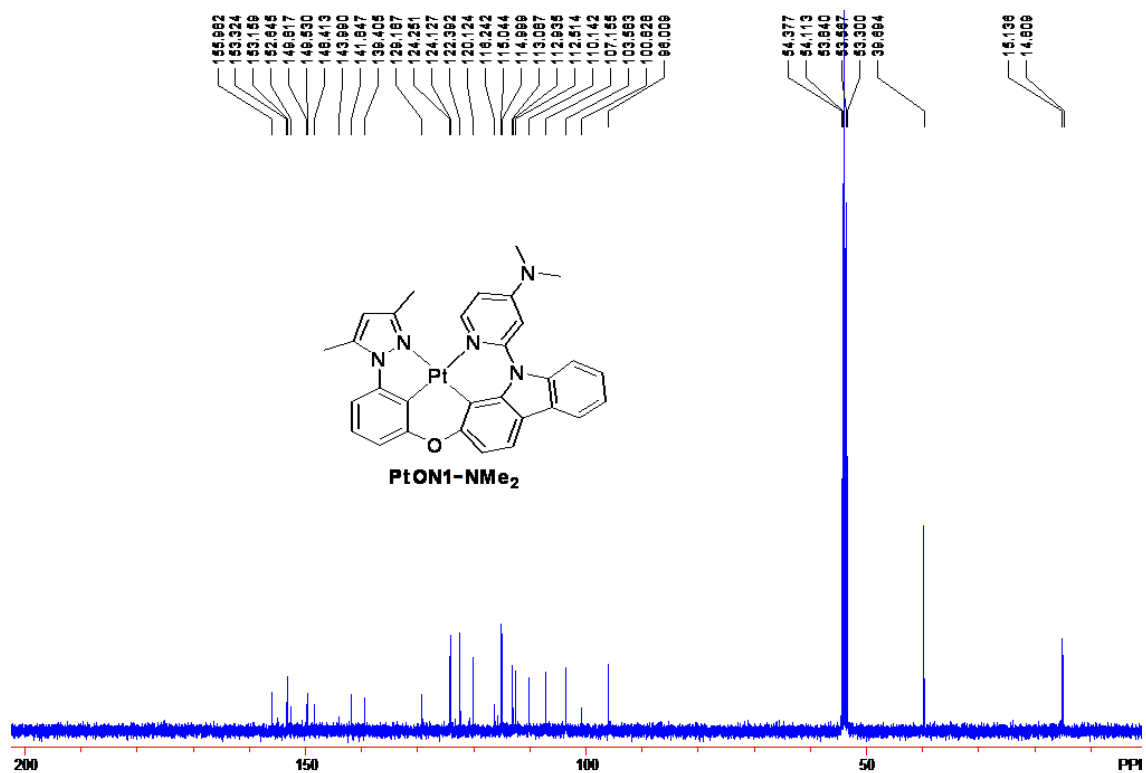

$^1\text{H}$  NMR spectrum of **PtON1-Cz** at 400 MHz instrument in  $\text{DMSO}-d_6$  solution:

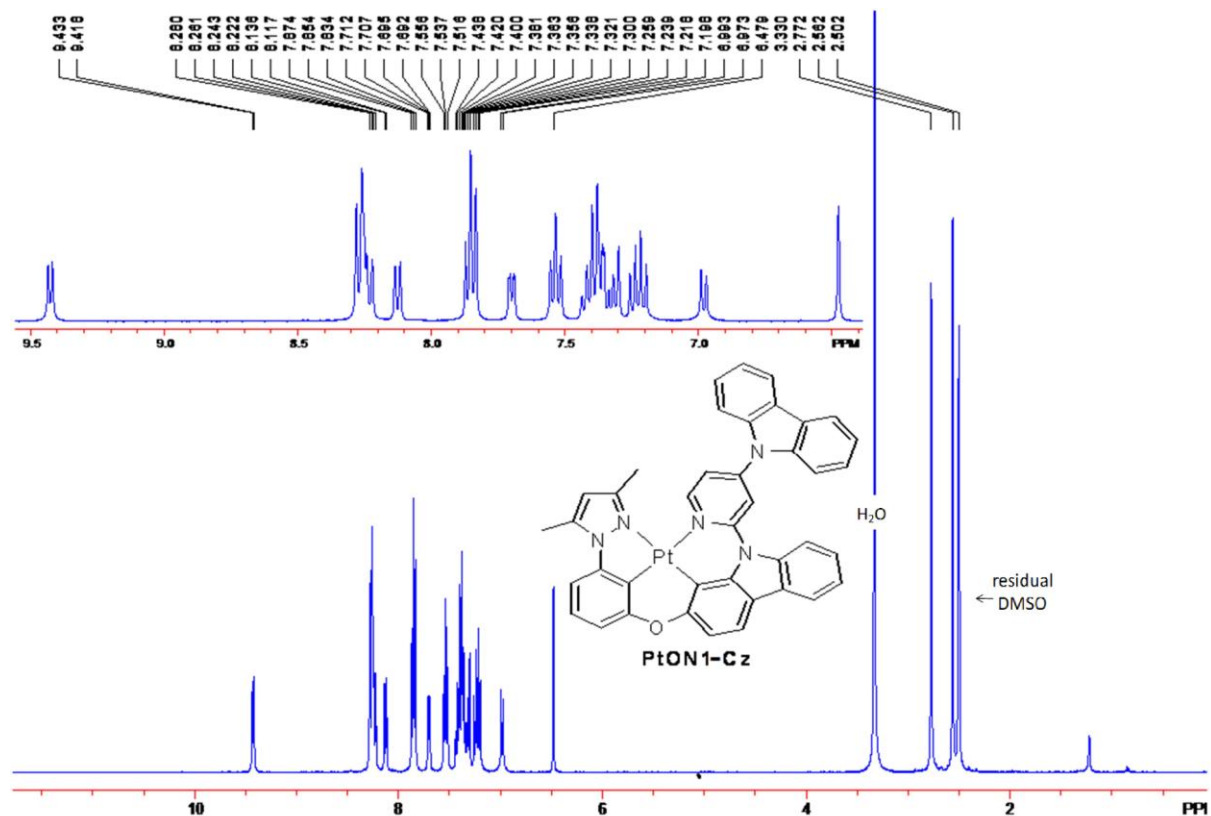



$^{13}\text{C}$  NMR spectrum of **PtON1-Cz** at 100 MHz instrument in  $\text{DMSO-}d_6$  solution:

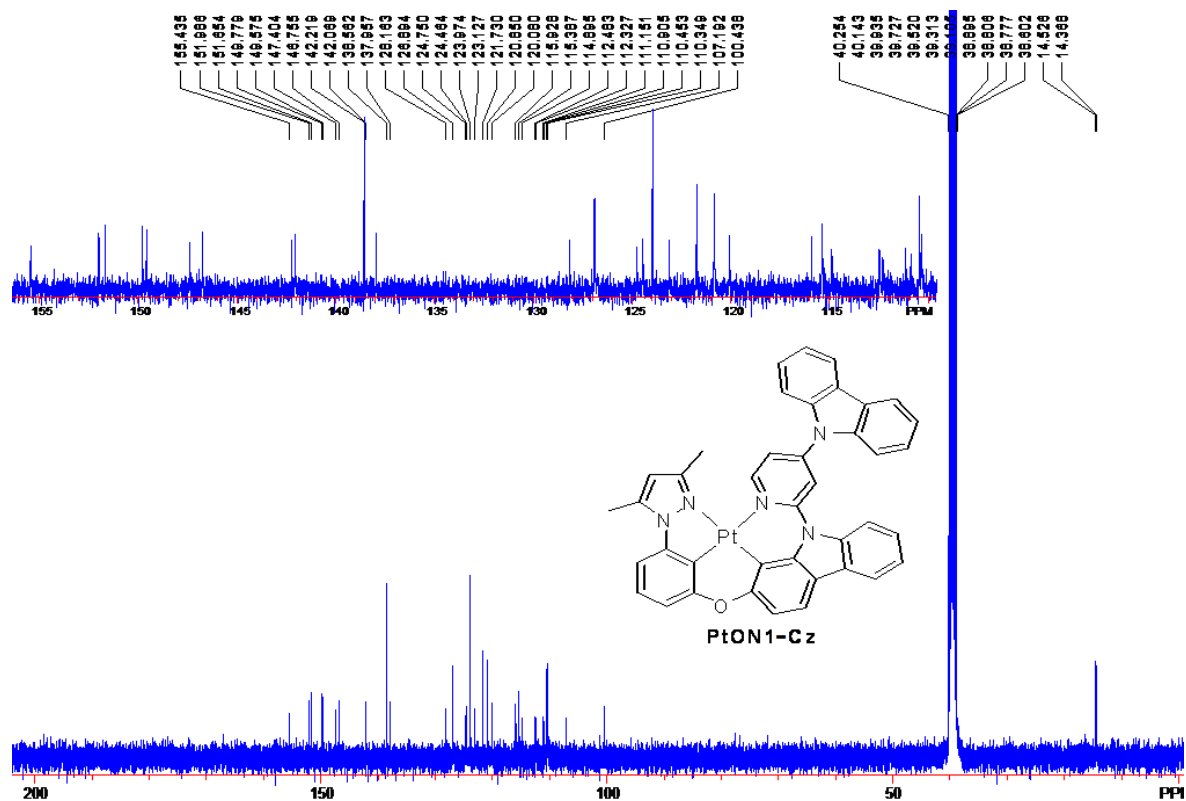

$^1\text{H}$  NMR spectrum of **PtON1-Me** at 400 MHz instrument in  $\text{CD}_2\text{Cl}_2$  solution:

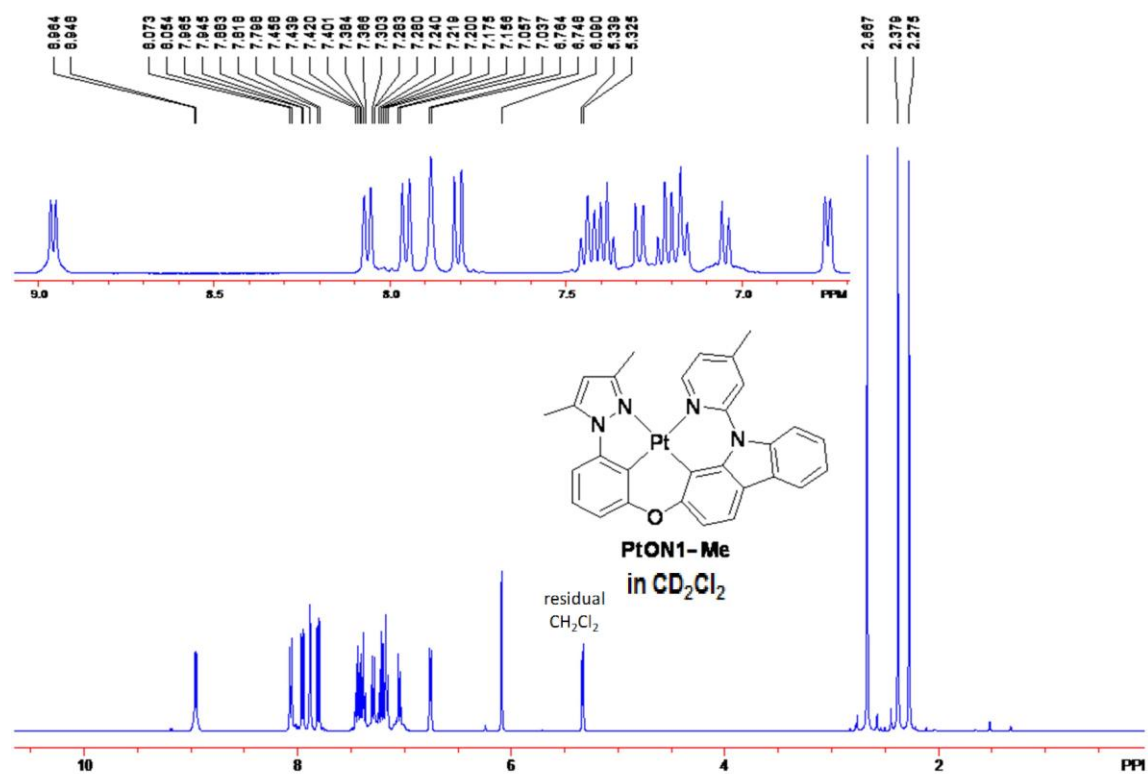

$^1\text{H}$  NMR spectrum of **PtON1-Me** at 400 MHz instrument in  $\text{DMSO}-d_6$  solution:

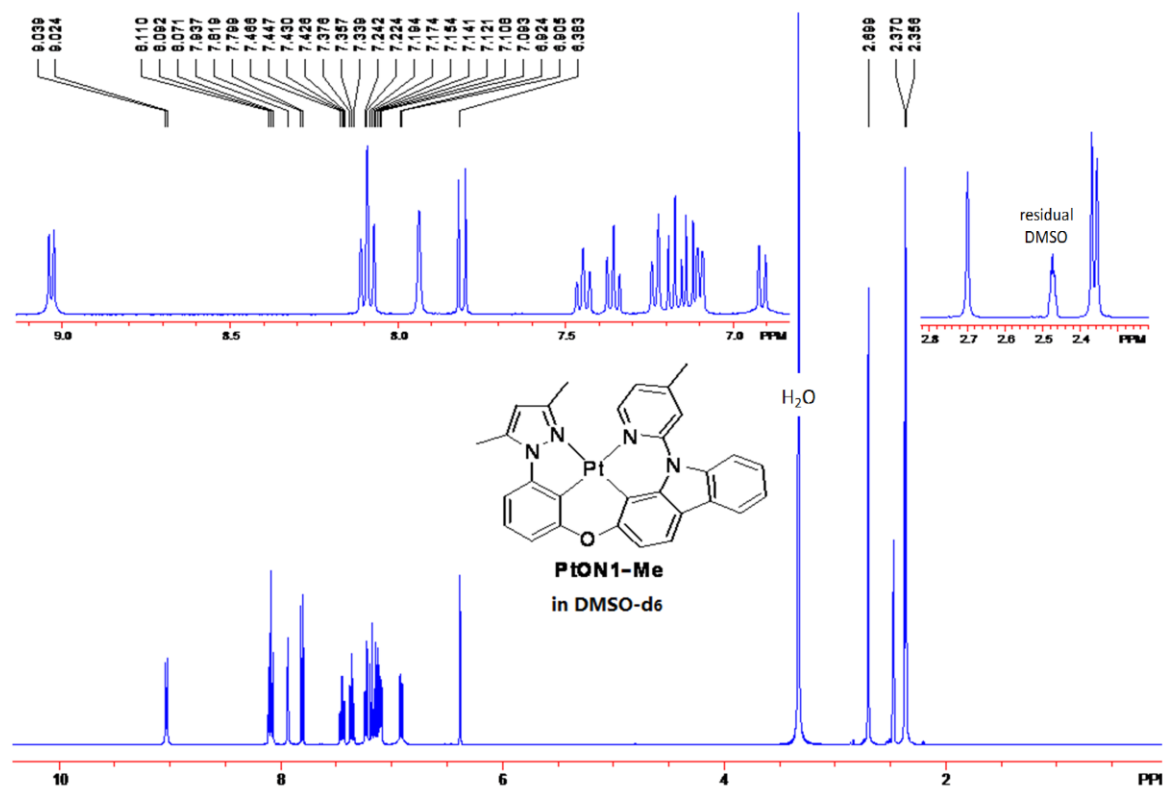

$^{13}\text{C}$  NMR spectrum of **PtON1-Me** at 100 MHz instrument in  $\text{CD}_2\text{Cl}_2$  solution:

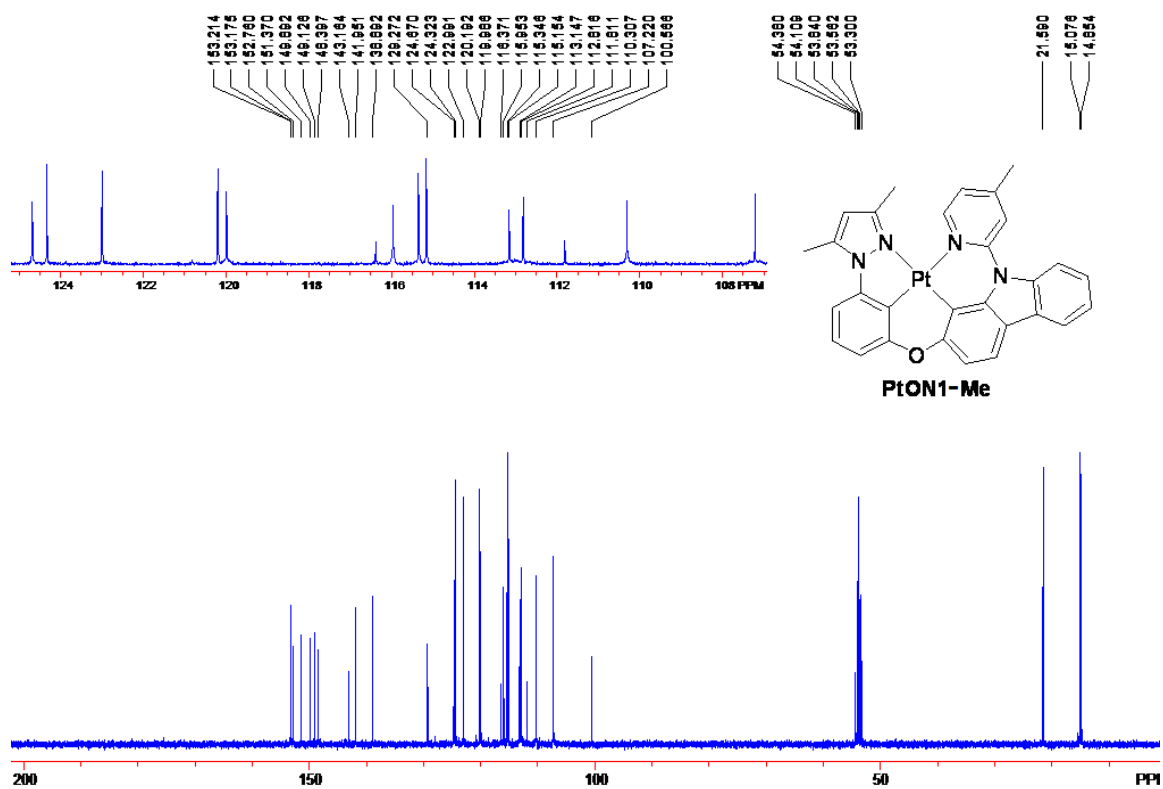

$^1\text{H}$  NMR spectrum of **PtON1-*m*Me** at 400 MHz instrument in  $\text{CD}_2\text{Cl}_2$  solution:

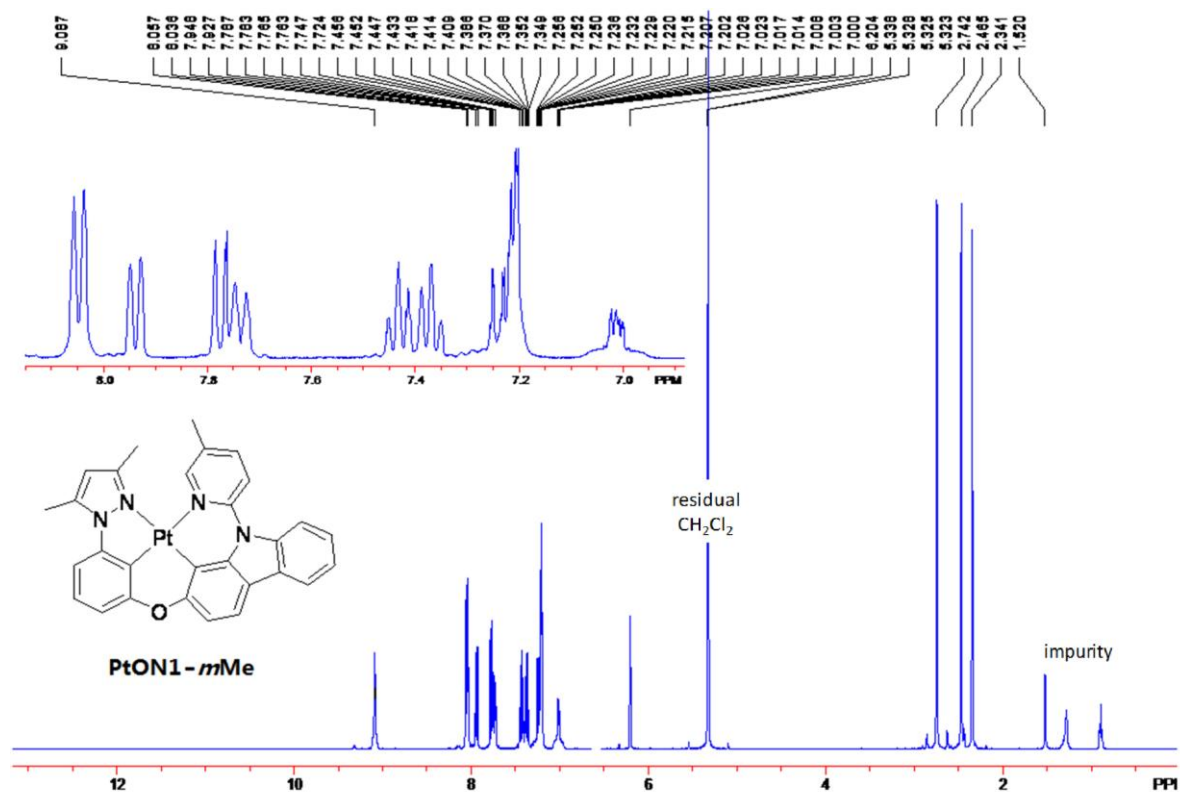

$^{13}\text{C}$  NMR spectrum of **PtON1-*m*Me** at 100 MHz instrument in  $\text{CD}_2\text{Cl}_2$  solution:

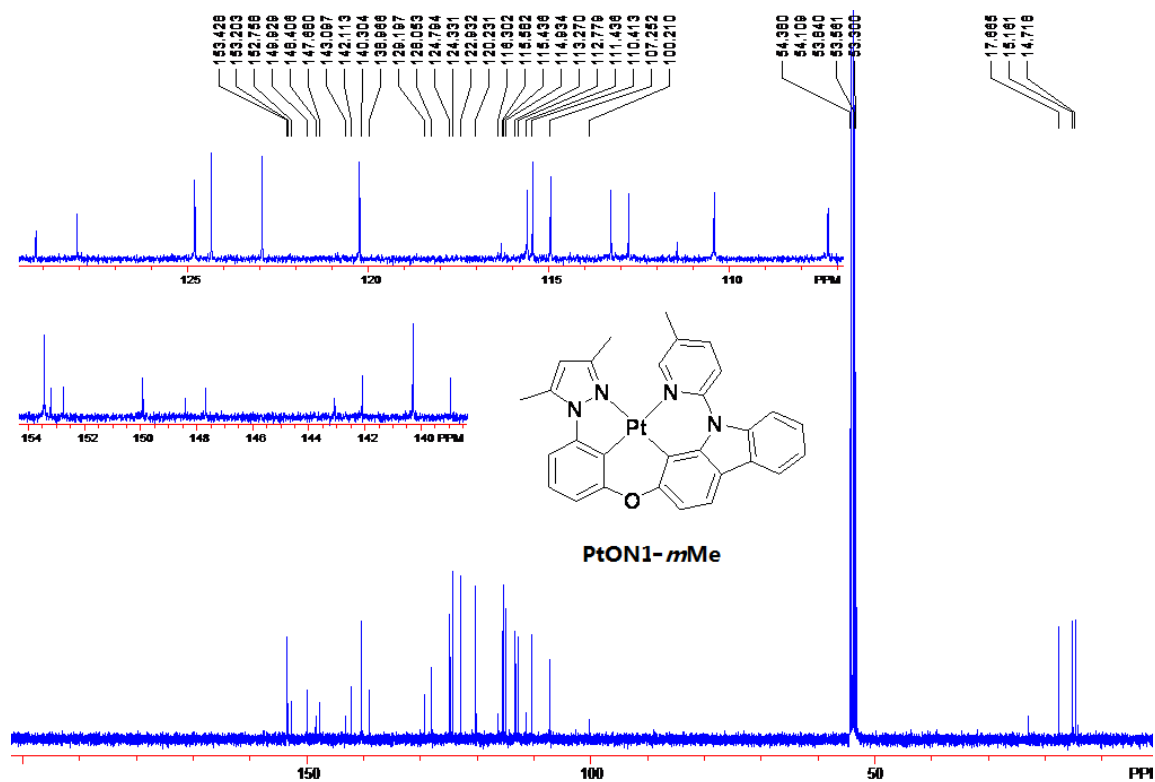

$^1\text{H}$  NMR spectrum of **PtON1-*o*Me** at 400 MHz instrument in  $\text{CD}_2\text{Cl}_2$  solution:

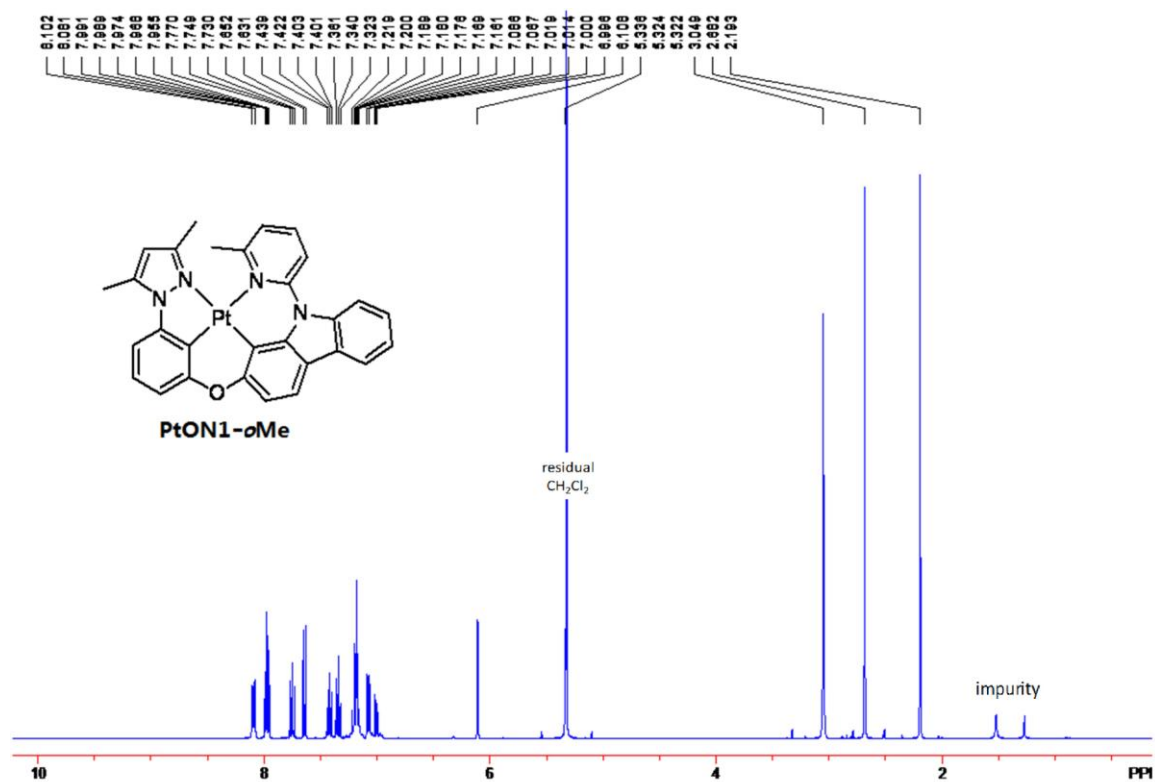

$^{13}\text{C}$  NMR spectrum of **PtON1-*o*Me** at 100 MHz instrument in  $\text{DMSO}-d_6$  solution:

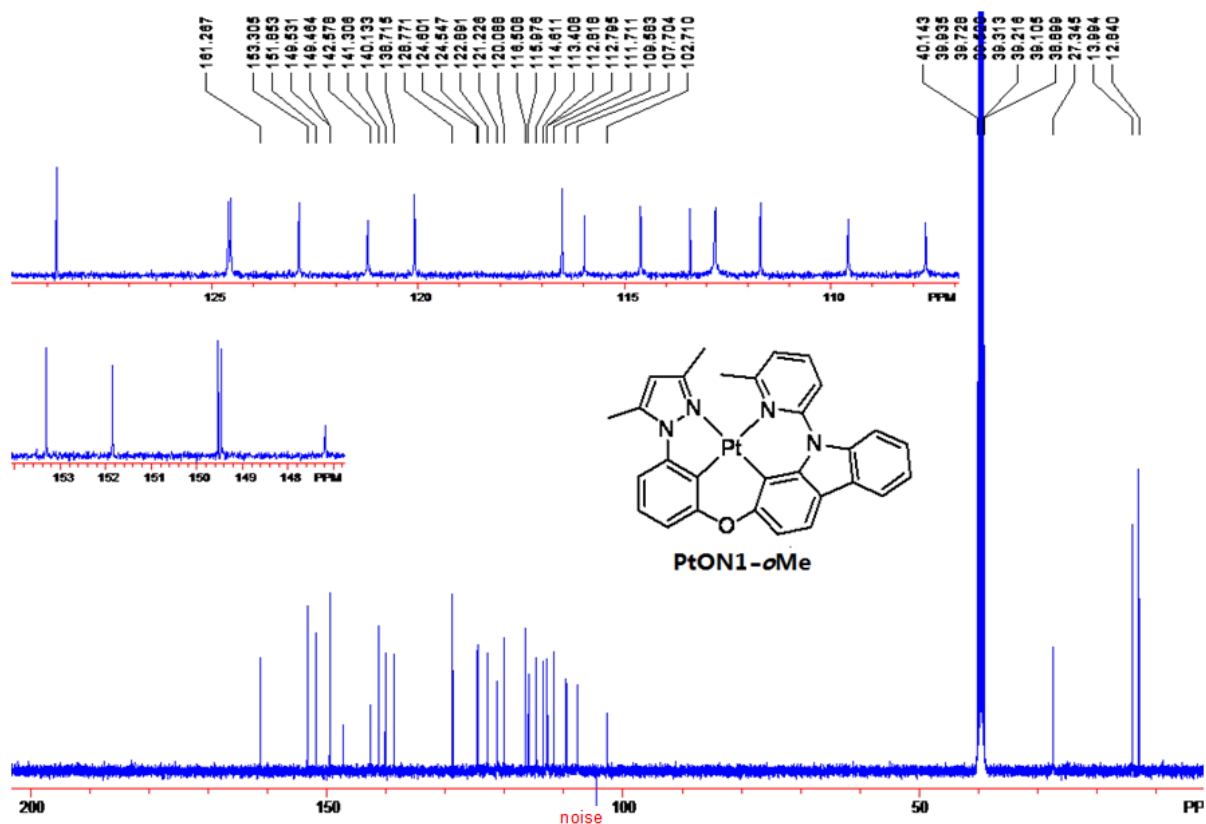

$^1\text{H}$  NMR spectrum of **PtON1-tBu** at 400 MHz instrument in  $\text{CD}_2\text{Cl}_2$  solution: <sup>S3</sup>

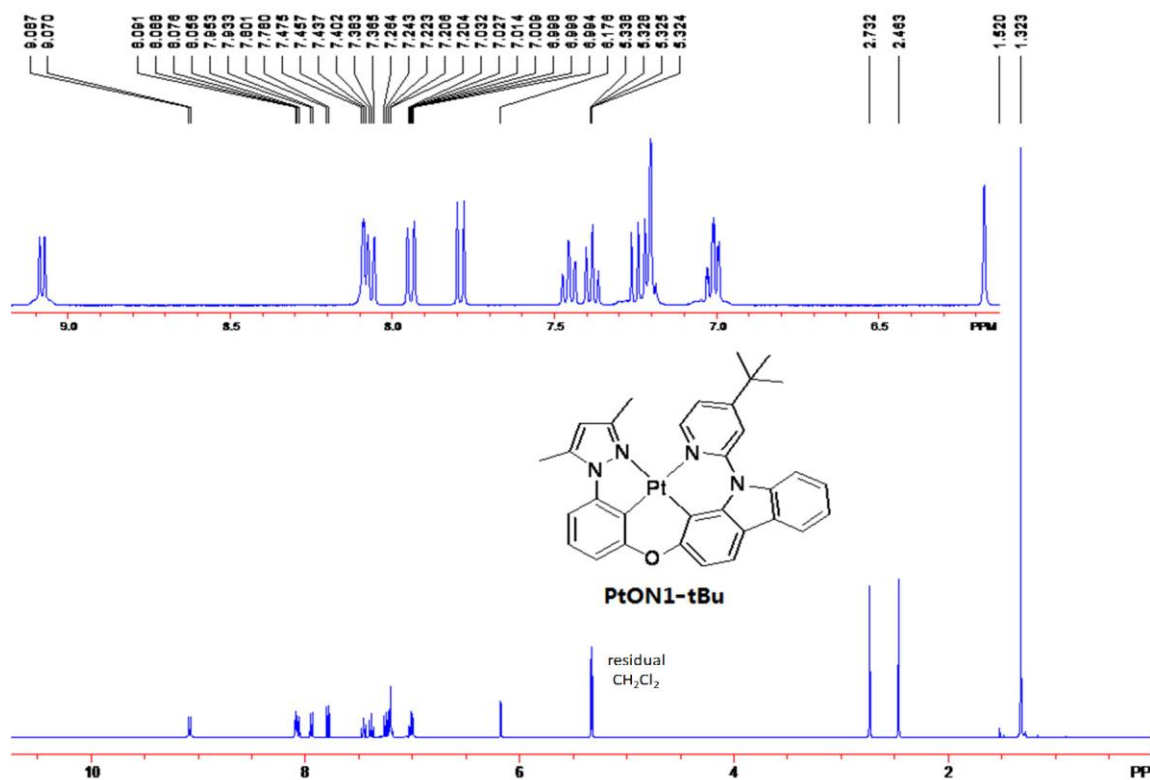

$^1\text{H}$  NMR spectrum of **PtON1-tBu** at 400 MHz instrument in  $\text{DMSO}-d_6$  solution:

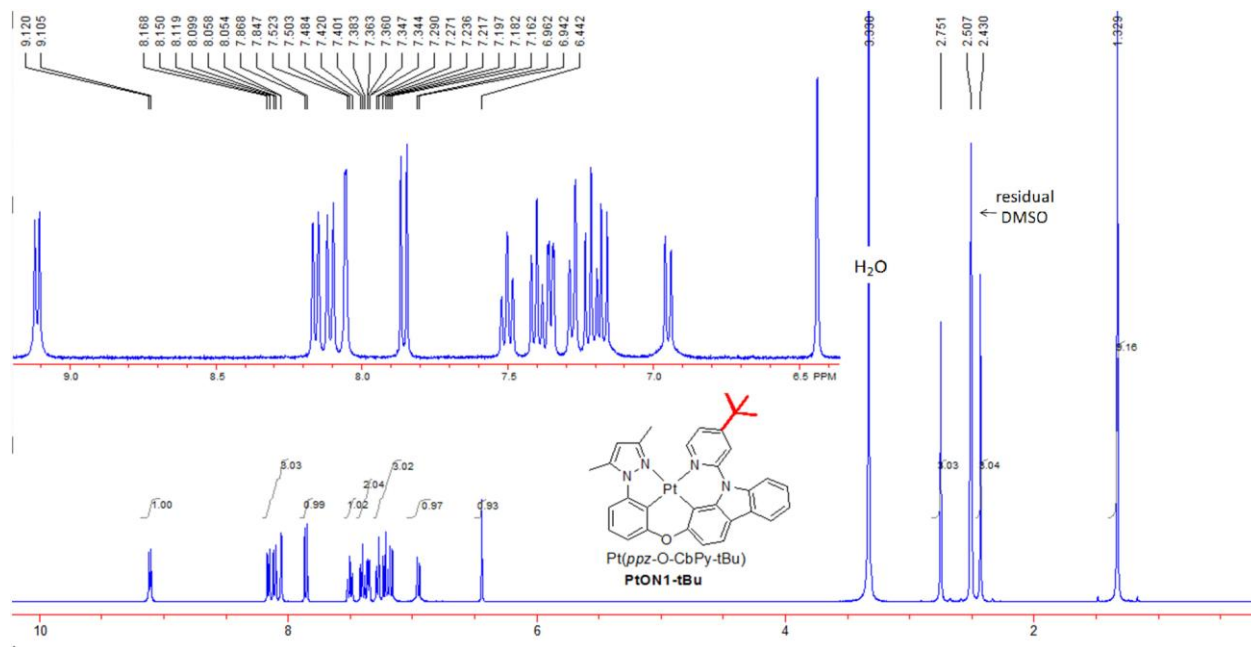

$^{13}\text{C}$  NMR spectrum of **PtON1-tBu** at 100 MHz instrument in  $\text{CD}_2\text{Cl}_2$  solution: <sup>S3</sup>

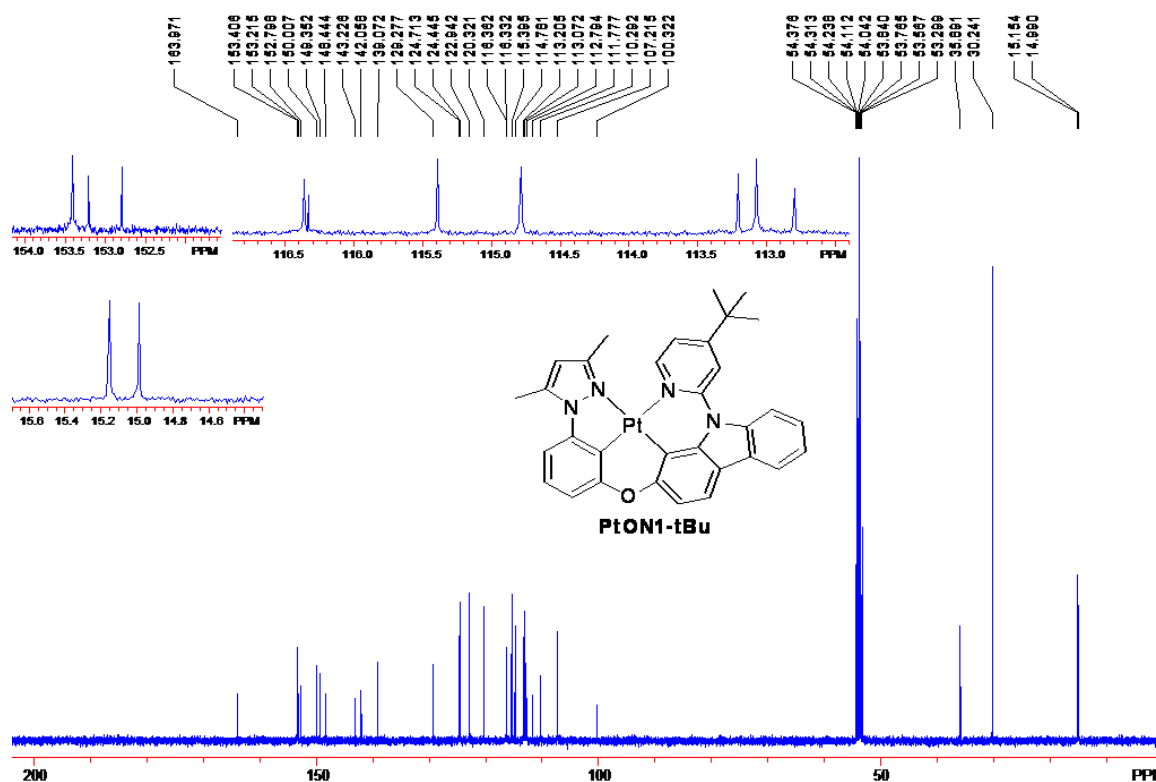

$^1\text{H}$  NMR spectrum of **PtON1-Ph** at 400 MHz instrument in  $\text{DMSO}-d_6$  solution:

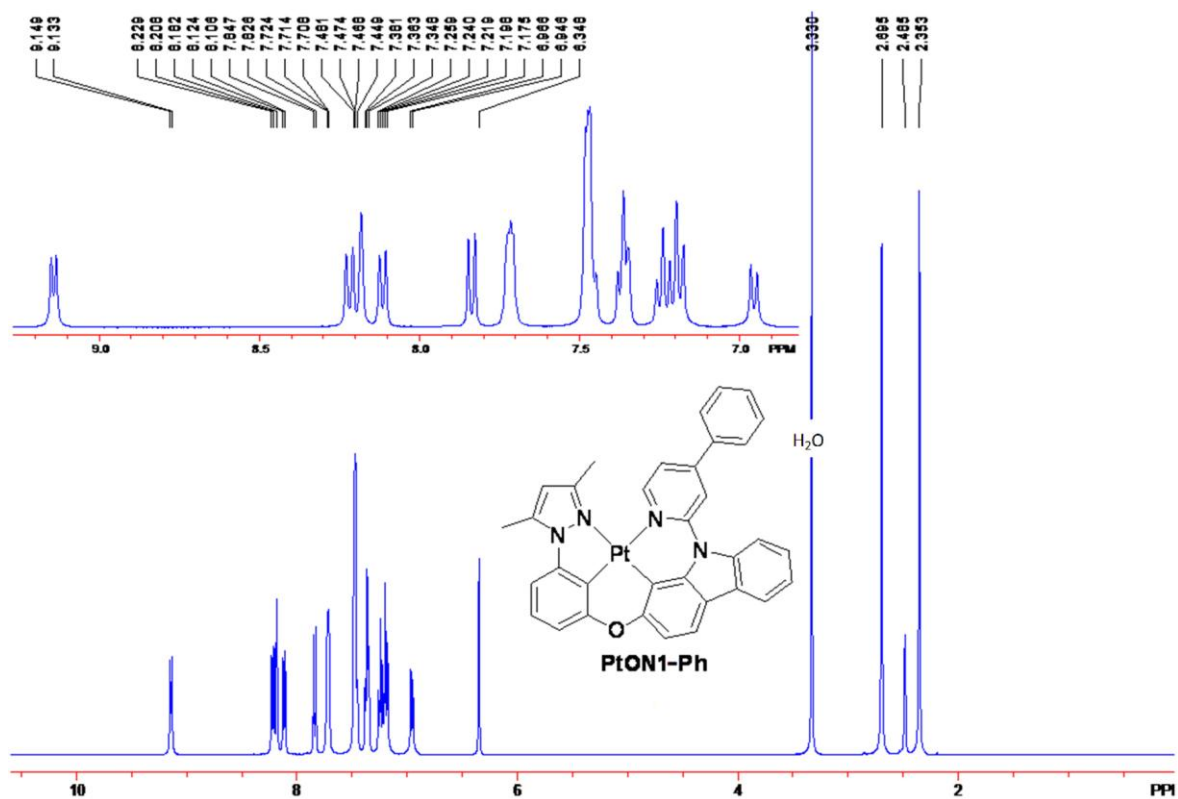

$^{13}\text{C}$  NMR spectrum of **PtON1-Ph** at 100 MHz instrument in  $\text{DMSO}-d_6$  solution:

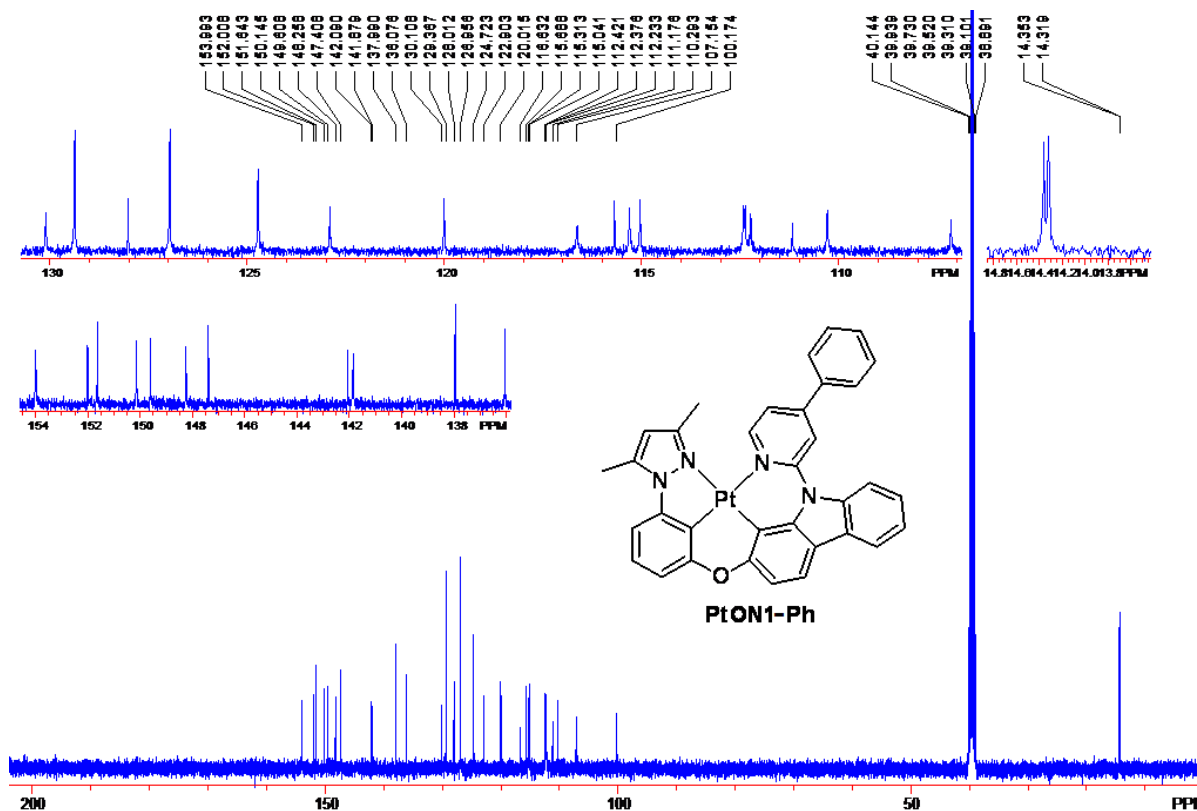

$^1\text{H}$  NMR spectrum of **PtON1- $\text{CF}_3$**  at 400 MHz instrument in  $\text{CD}_2\text{Cl}_2$  solution:

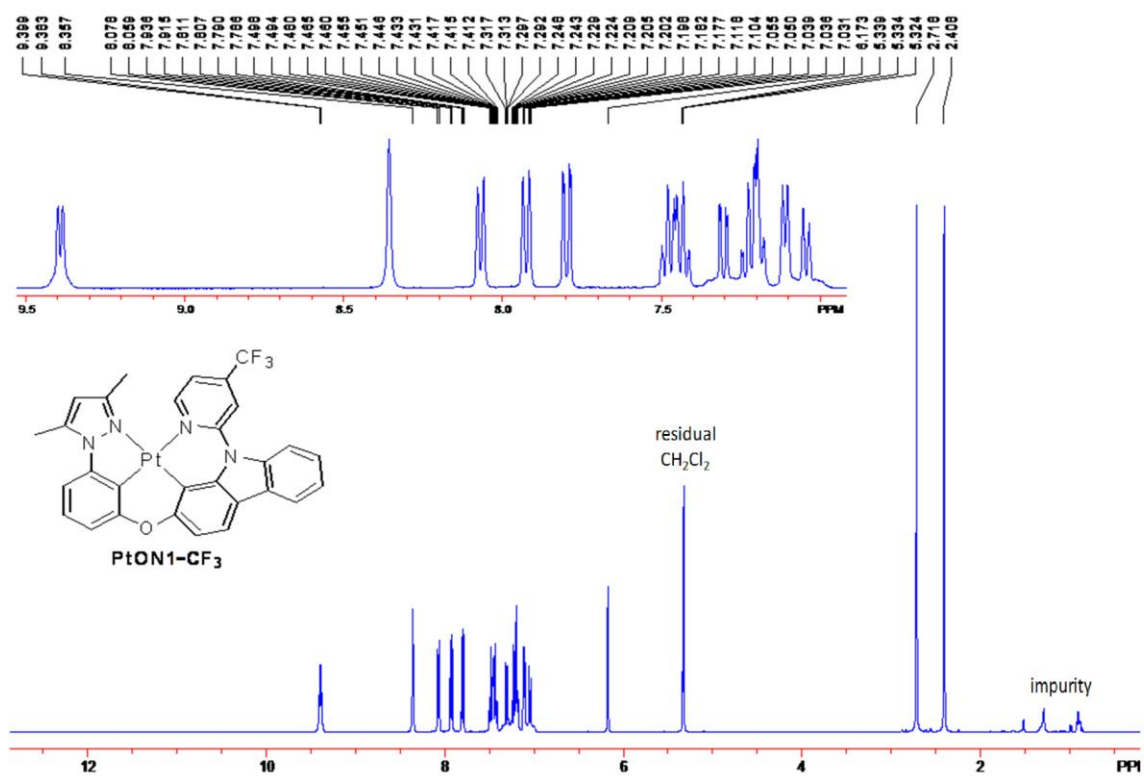

$^{13}\text{C}$  NMR spectrum of **PtON1-CF<sub>3</sub>** at 100 MHz instrument in CD<sub>2</sub>Cl<sub>2</sub> solution:

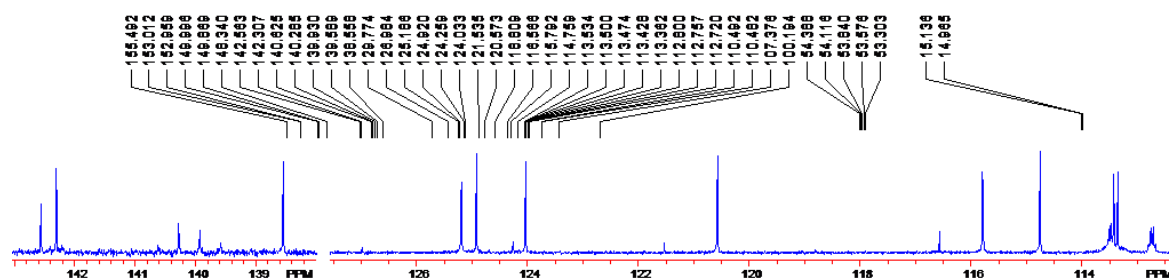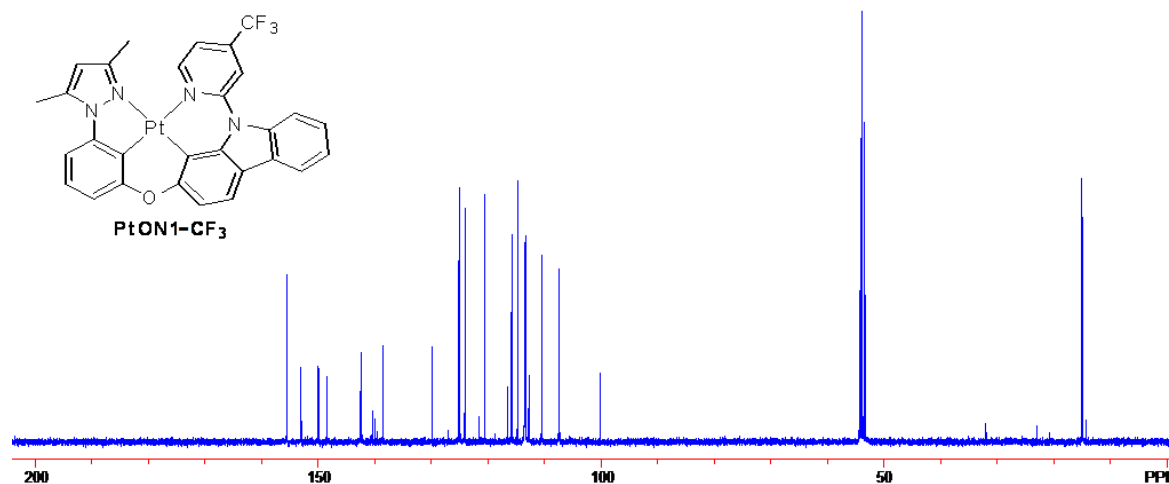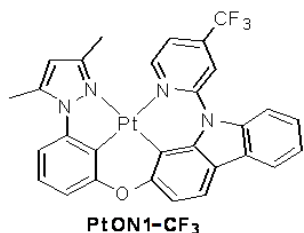

$^{19}\text{F}$  NMR spectrum of **PtON1-CF<sub>3</sub>** at 376 MHz instrument in DMSO-*d*<sub>6</sub> solution:

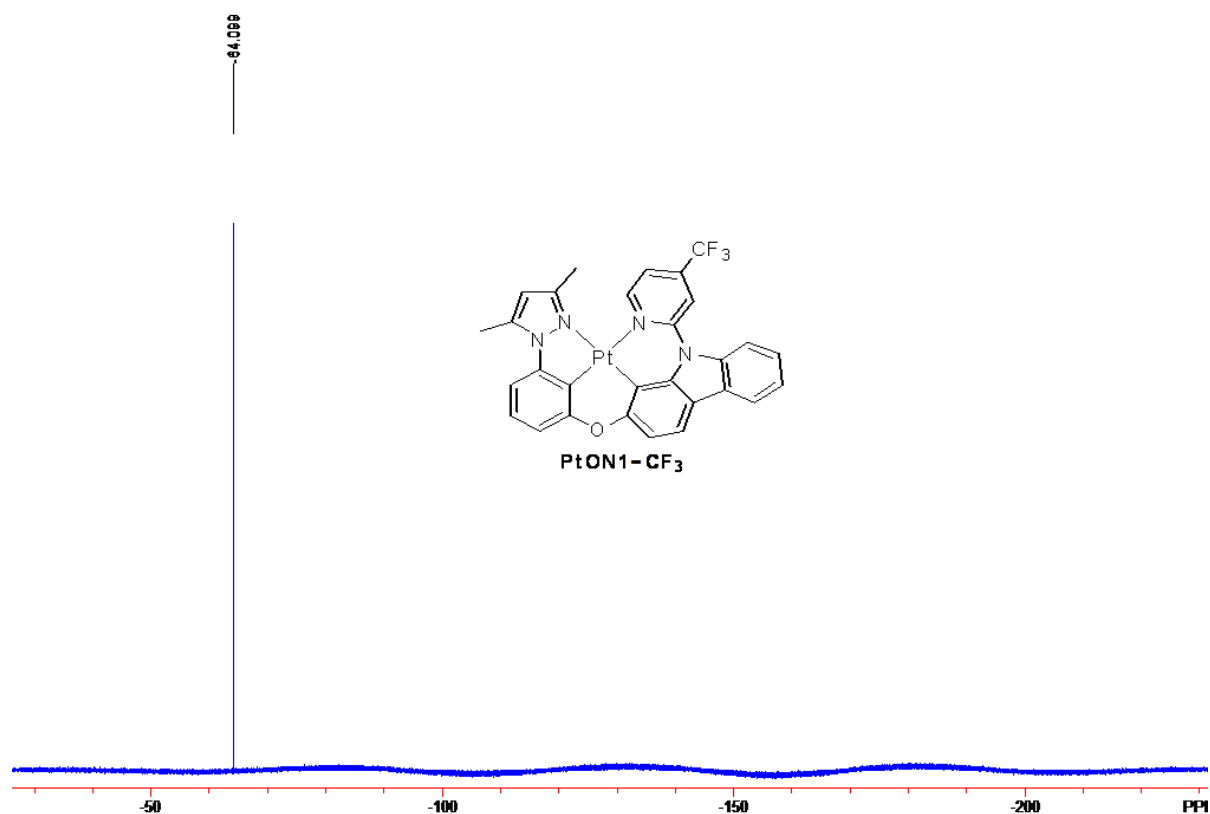



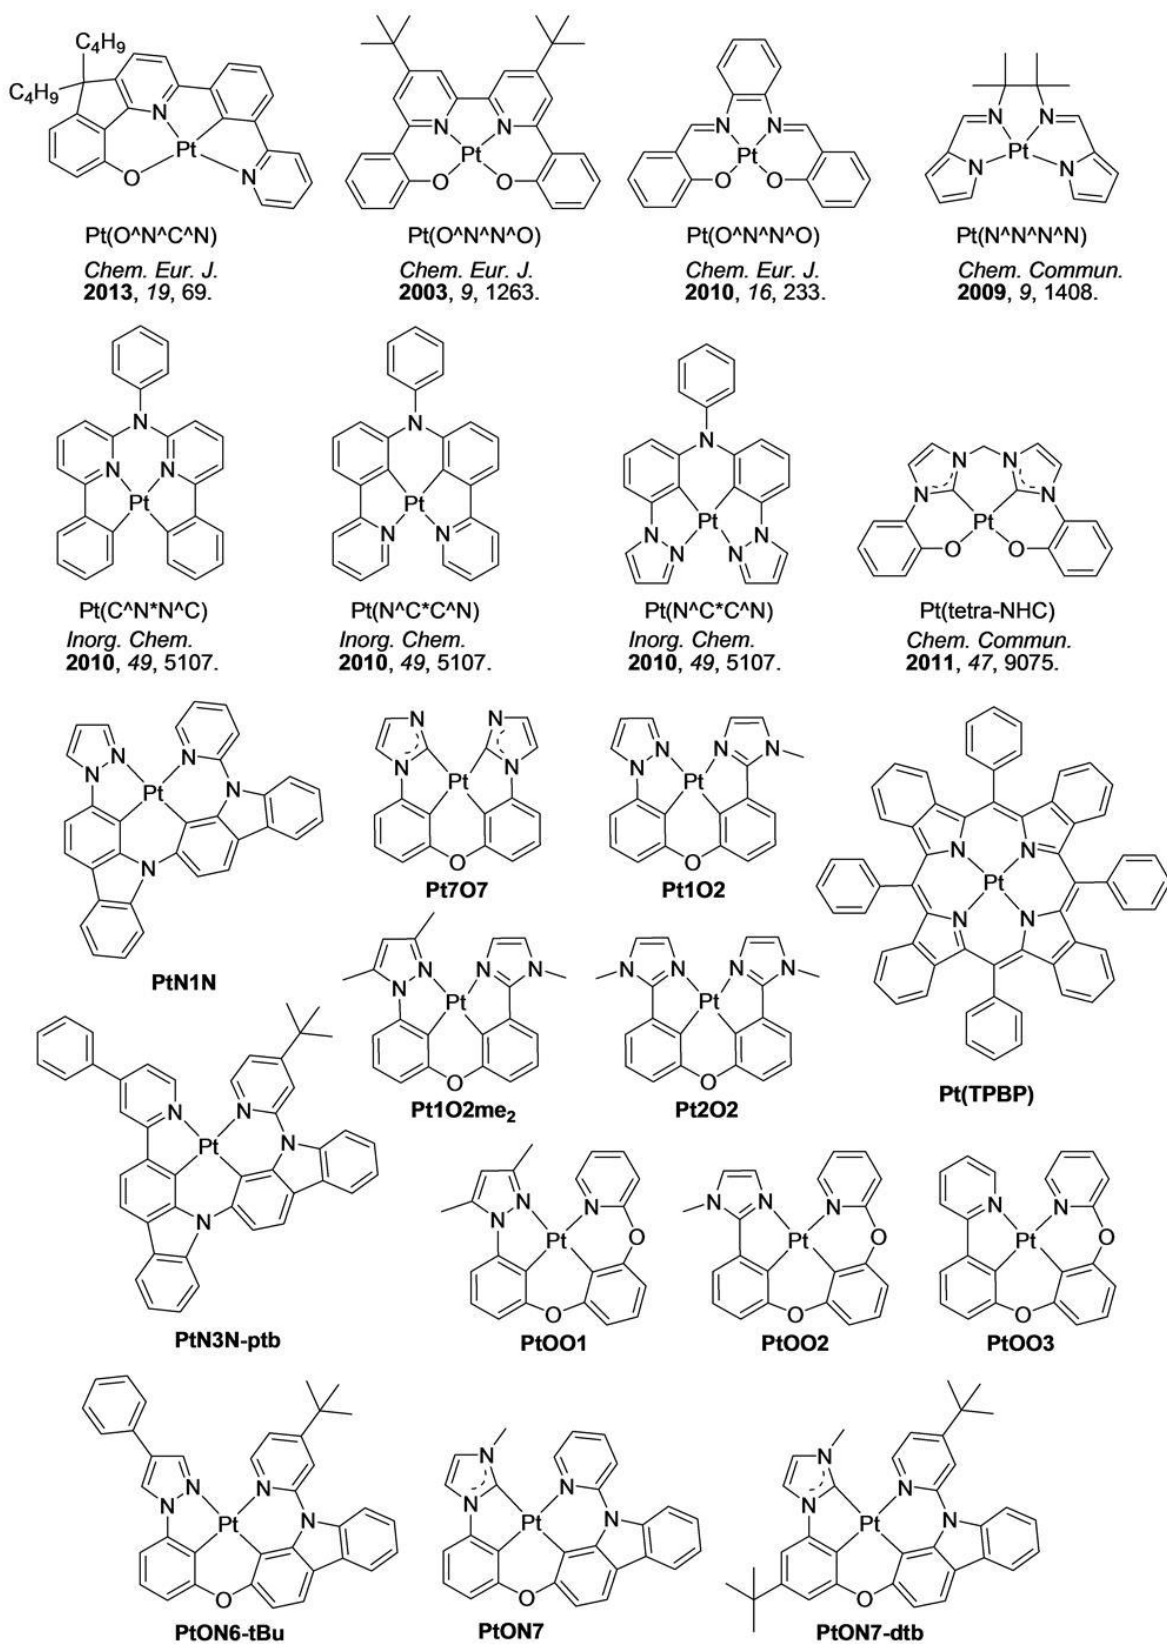

**Figure S1.** Molecular structures for the tertridentate Pt(II) complexes discussed in this report.

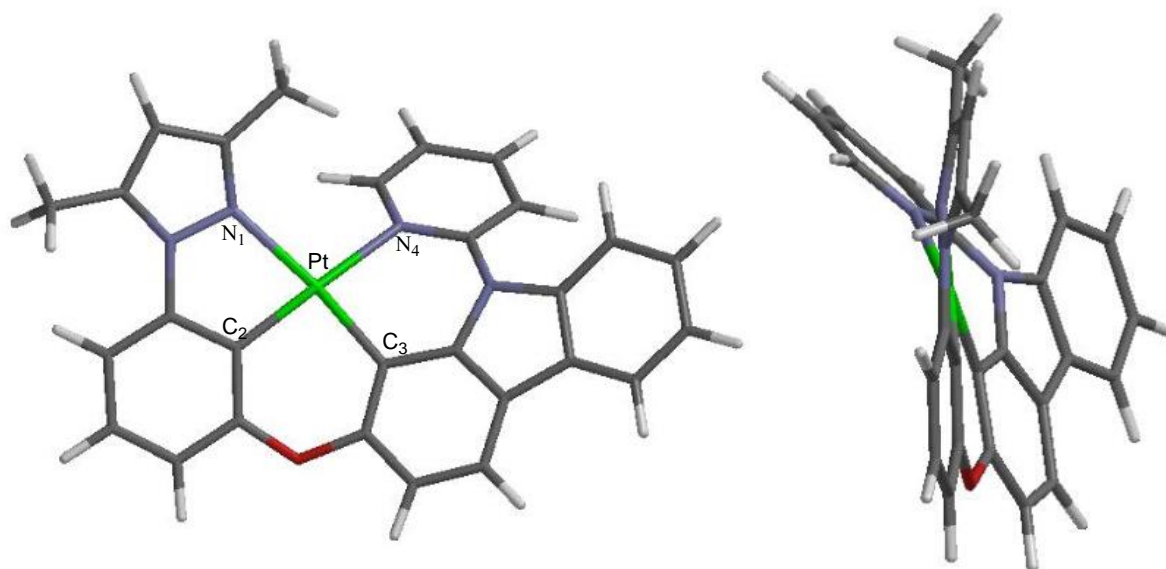

**Figure S2:** Optimized molecular structure of **PtON1** based on the DFT calculation, top-view (left) and side-view (right)<sup>3</sup>

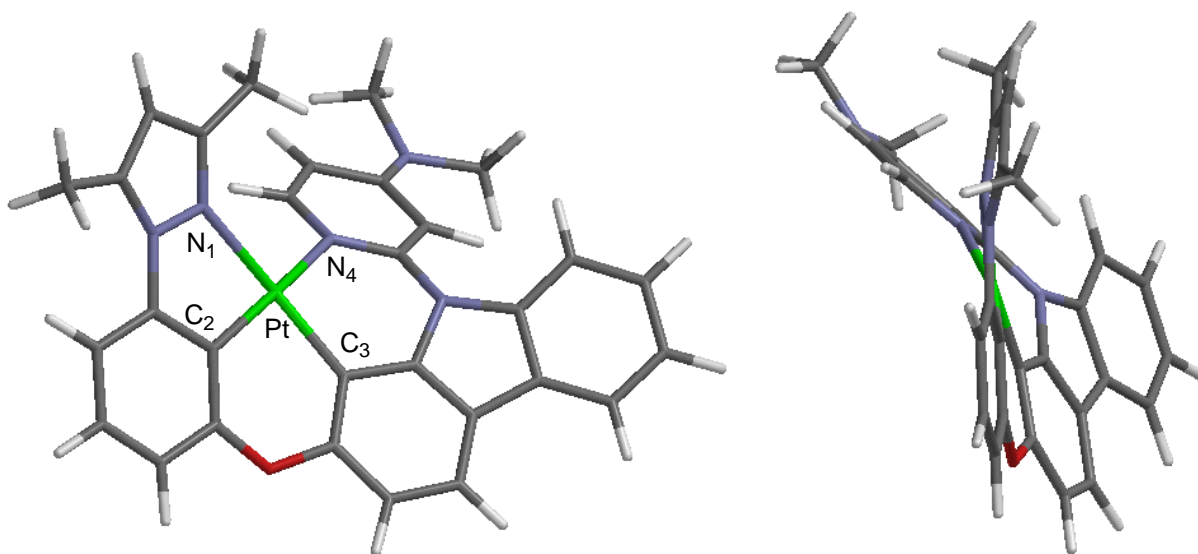

**Figure S3:** Optimized molecular structure of **PtON1-NMe<sub>2</sub>** based on the DFT calculation, top-view (left) and side-view (right)

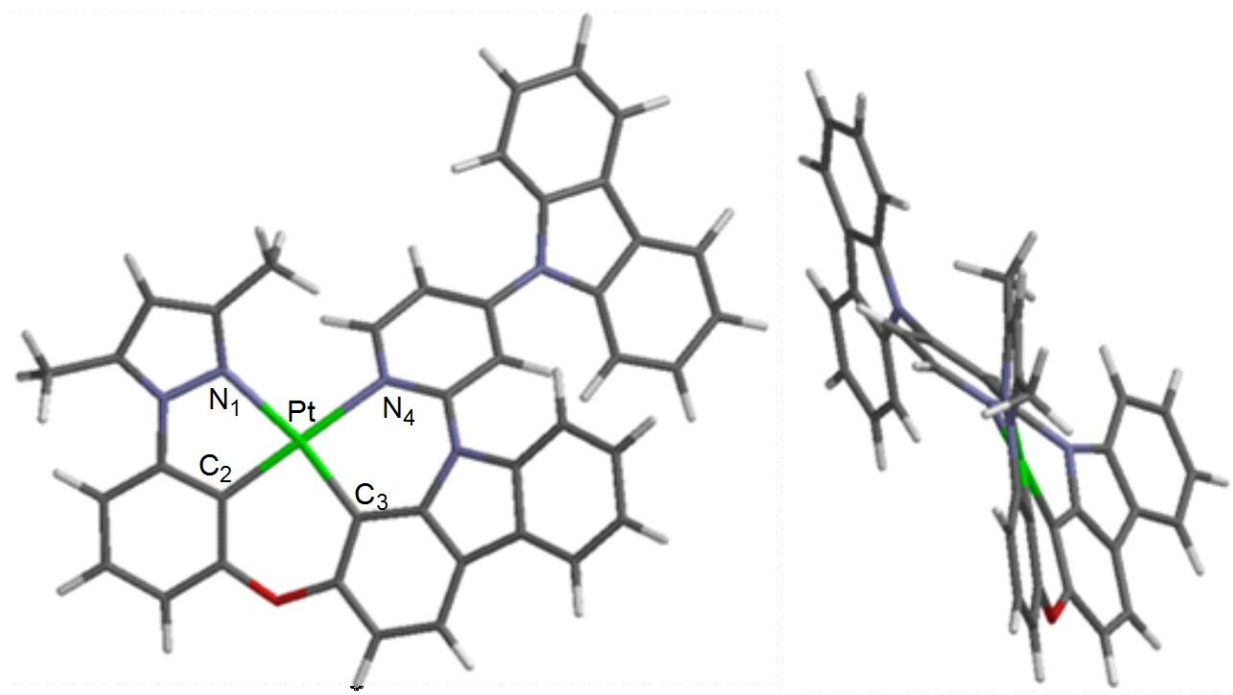

**Figure S4:** Optimized molecular structure of **PtON1-Cz** based on the DFT calculation, top-view (left) and side-view (right)

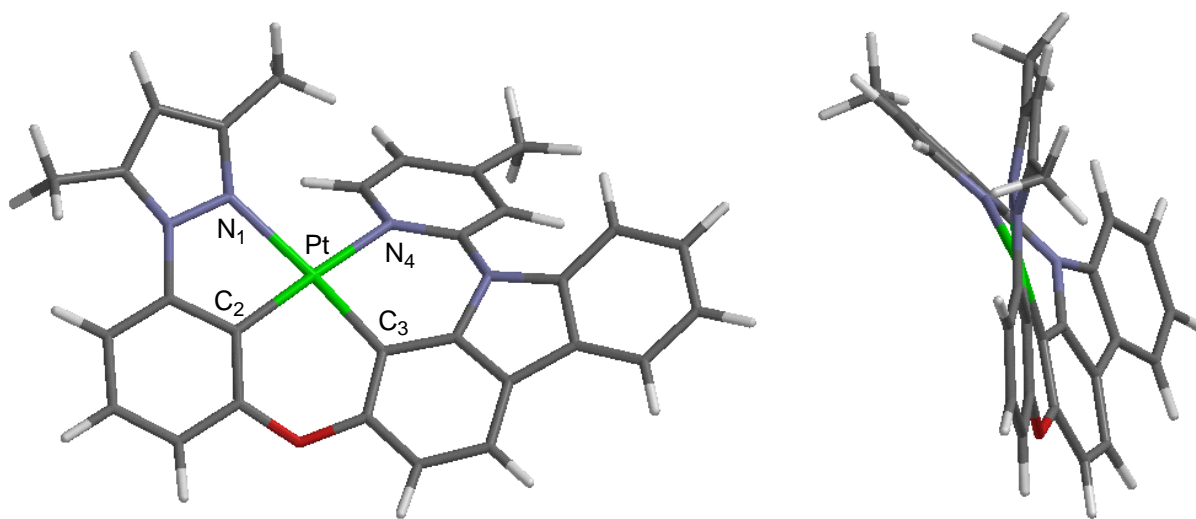

**Figure S5:** Optimized molecular structure of **PtON1-Me** based on the DFT calculation, top-view (left) and side-view (right)

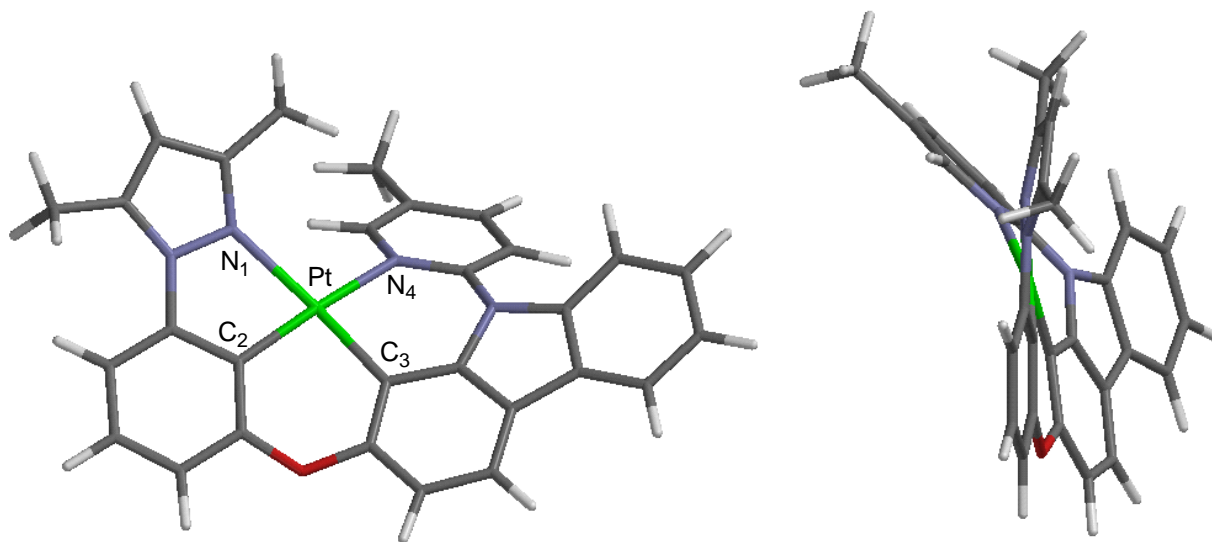

**Figure S6:** Optimized molecular structure of **PtON1-*m*Me** based on the DFT calculation, top-view (left) and side-view (right)

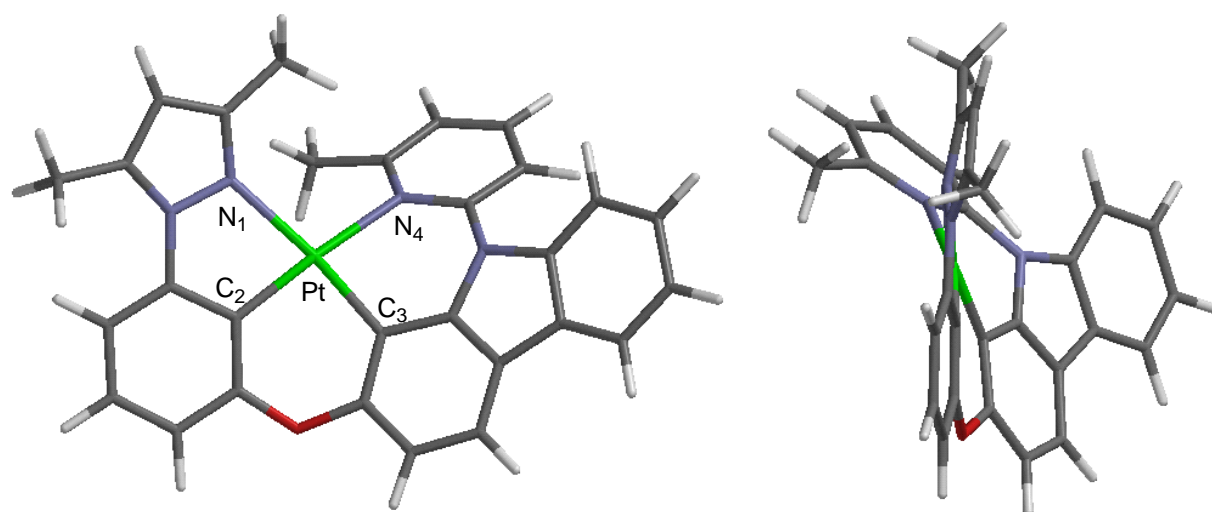

**Figure S7:** Optimized molecular structure of **PtON1-*o*Me** based on the DFT calculation, top-view (left) and side-view (right)

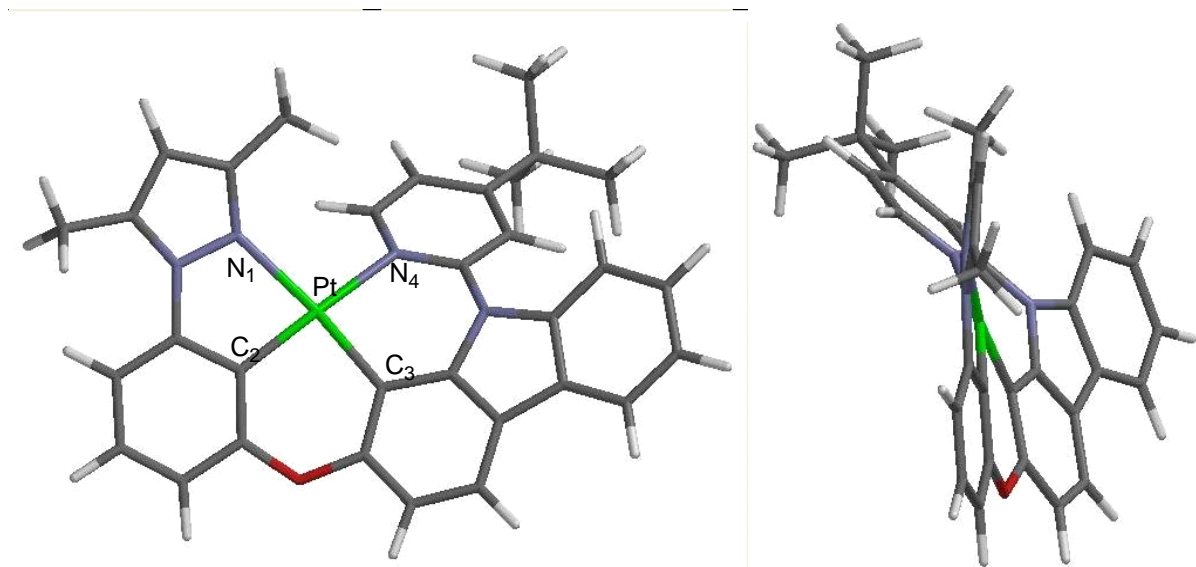

**Figure S8:** Optimized molecular structure of **PtON1-tBu** based on the DFT calculation, top-view (left) and side-view (right)<sup>3</sup>

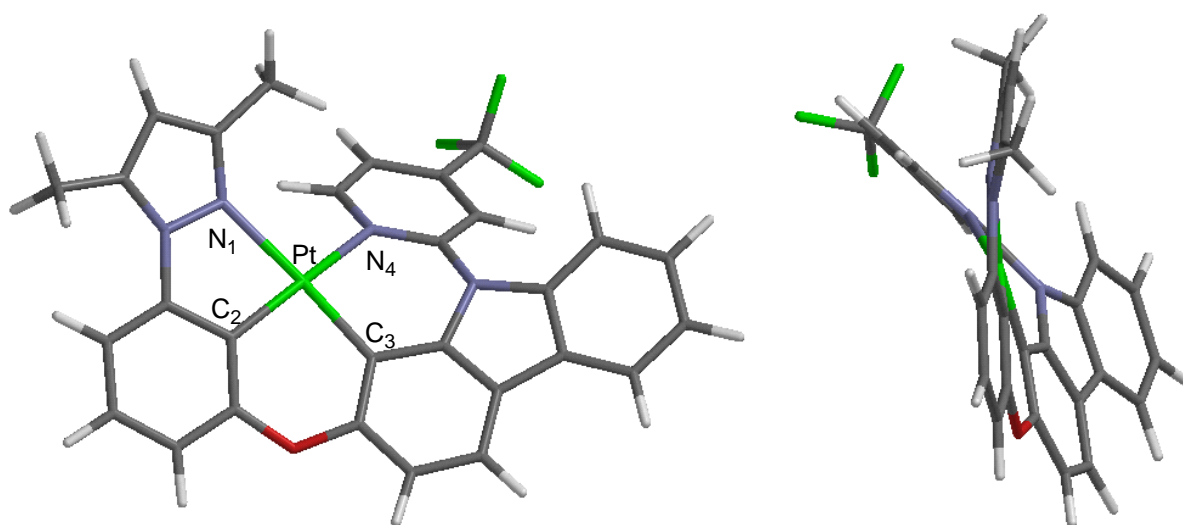

**Figure S9:** Optimized molecular structure of **PtON1-CF<sub>3</sub>** based on the DFT calculation, top-view (left) and side-view (right)

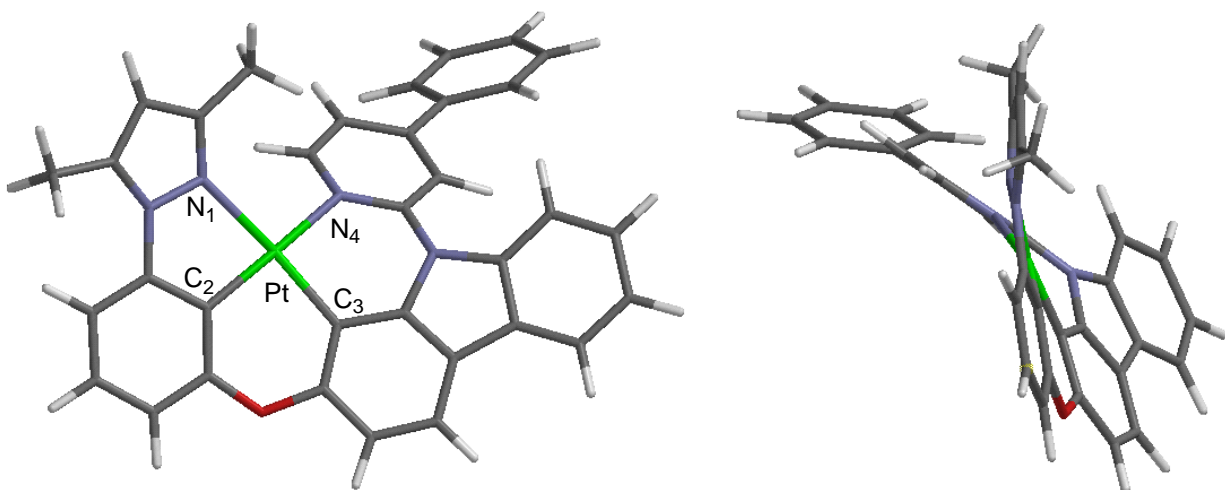

**Figure S10:** Optimized molecular structure of **PtON1-Ph** based on the DFT calculation, top-view (left) and side-view (right)

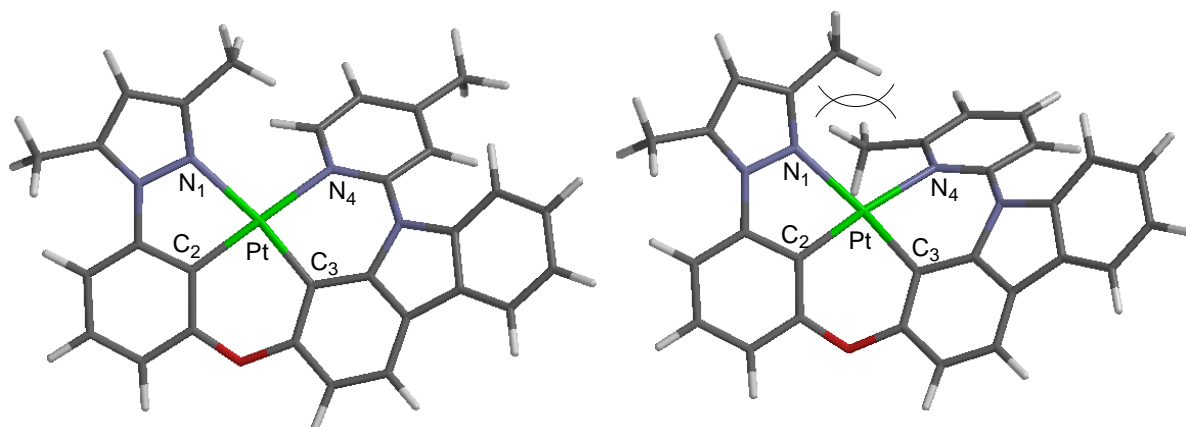

**Figure S11:** Optimized molecular structures of **PtON1-Me** (left) and **PtON1oMe** (right) based on the DFT calculation, top-view.

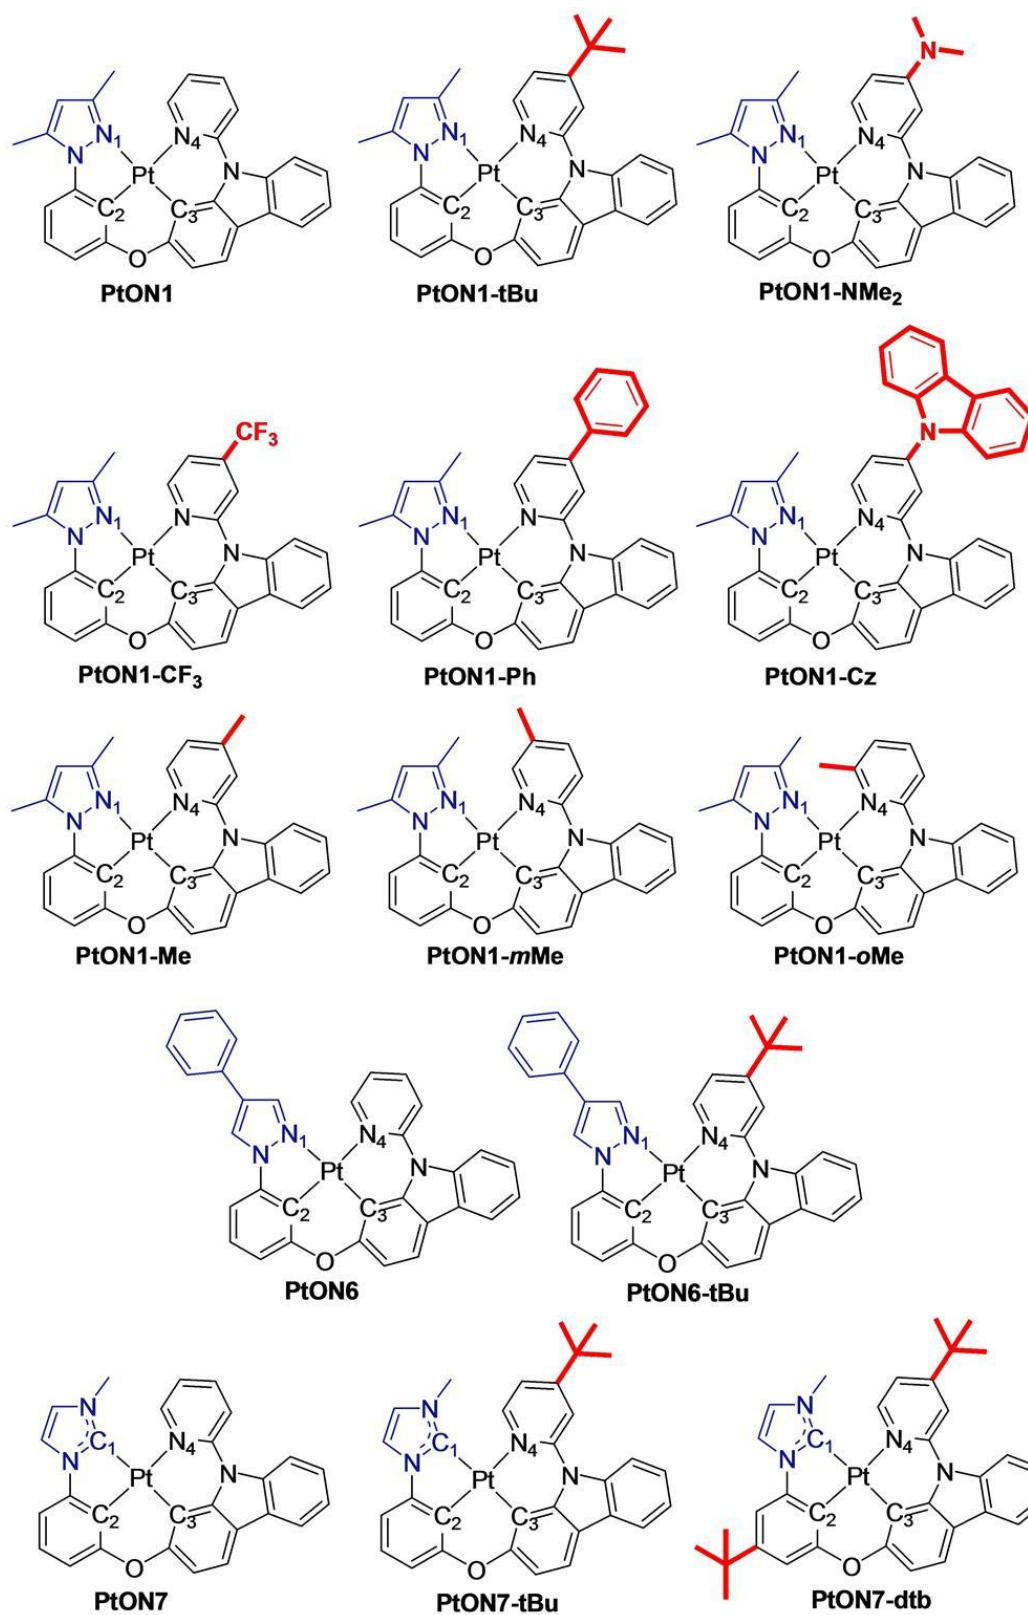

**Figure S12:** Chemical Structures of PtON1, PtON6, PtON7 and their derivatives.



**Table S 1:** Selected bond lengths (Å) for PtON1 and its analoges based on the DFT calculation and X-ray crystallographic analysis.

| Pt complexes                           | Pt-N <sub>1</sub> (C <sub>1</sub> ) | Pt-C <sub>2</sub> | Pt-C <sub>3</sub> | Pt-N <sub>4</sub> |
|----------------------------------------|-------------------------------------|-------------------|-------------------|-------------------|
| PtON1 (DFT) <sup>S3</sup>              | 2.18                                | 1.98              | 1.98              | 2.19              |
| PtON1-NMe <sub>2</sub> (DFT)           | 2.18                                | 1.98              | 1.99              | 2.18              |
| PtON1-Cz (DFT)                         | 2.18                                | 1.98              | 1.98              | 2.18              |
| PtON1-Me (DFT)                         | 2.18                                | 1.98              | 1.99              | 2.18              |
| PtON1- <i>m</i> Me (DFT)               | 2.18                                | 1.98              | 1.99              | 2.19              |
| PtON1- <i>o</i> Me (DFT)               | 2.19                                | 1.98              | 1.98              | <b>2.23</b>       |
| PtON1- <i>t</i> Bu (DFT) <sup>S3</sup> | 2.18                                | 1.98              | 1.99              | 2.18              |
| PtON1-Ph (DFT)                         | 2.18                                | 1.98              | 1.98              | 2.18              |
| PtON1-CF <sub>3</sub> (DFT)            | 2.18                                | 1.98              | 1.98              | 2.18              |
| PtON6 (DFT) <sup>S3</sup>              | 2.18                                | 1.98              | 1.98              | 2.18              |
| PtON6- <i>t</i> Bu (DFT) <sup>S3</sup> | 2.17                                | 1.98              | 1.98              | 2.17              |
| PtON7 (DFT) <sup>S3</sup>              | 2.08                                | 1.99              | 2.02              | 2.19              |
| PtON7- <i>t</i> Bu (DFT) <sup>S3</sup> | 2.08                                | 1.99              | 2.02              | 2.19              |
| PtON7-dtb (DFT) <sup>S3</sup>          | 2.08                                | 1.99              | 2.03              | 2.19              |
| PtON7-dtb (X-ray) <sup>S3</sup>        | 2.038(4)                            | 1.973(4)          | 2.012(4)          | 2.111(3)          |

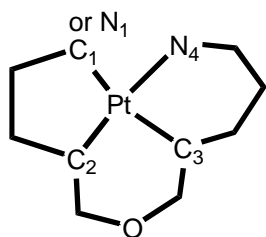

**Table S2:** Selected bond angles (°) for PtON1 and its analoges based on the DFT calculation and X-ray crystallographic analysis.

| Pt complexes                           | N <sub>1</sub> (C <sub>1</sub> )-Pt-C <sub>2</sub> | C <sub>2</sub> -Pt-C <sub>3</sub> | C <sub>3</sub> -Pt-N <sub>4</sub> | N <sub>4</sub> -Pt-N <sub>1</sub> (C <sub>1</sub> ) | N <sub>1</sub> (C <sub>1</sub> )-Pt-C <sub>3</sub> | C <sub>2</sub> -Pt-N <sub>4</sub> |
|----------------------------------------|----------------------------------------------------|-----------------------------------|-----------------------------------|-----------------------------------------------------|----------------------------------------------------|-----------------------------------|
| PtON1 (DFT) <sup>S3</sup>              | 79.09                                              | 91.54                             | 89.31                             | 102.10                                              | 165.66                                             | 168.16                            |
| PtON1-NMe <sub>2</sub> (DFT)           | 79.03                                              | 91.43                             | 88.93                             | 102.53                                              | 165.33                                             | 169.19                            |
| PtON1-Cz (DFT)                         | 79.09                                              | 91.05                             | 88.98                             | 102.45                                              | 165.39                                             | 168.73                            |
| PtON1-Me (DFT)                         | 78.94                                              | 91.63                             | 89.36                             | 102.01                                              | 165.98                                             | 168.19                            |
| PtON1- <i>m</i> Me (DFT)               | 79.03                                              | 91.58                             | 89.31                             | 102.12                                              | 165.75                                             | 167.97                            |
| PtON1- <i>o</i> Me (DFT)               | 78.76                                              | 90.69                             | 87.78                             | <b>105.33</b>                                       | <b>162.21</b>                                      | 168.66                            |
| PtON1- <i>t</i> Bu (DFT) <sup>S3</sup> | 79.06                                              | 91.57                             | 89.24                             | 102.15                                              | 165.74                                             | 168.18                            |
| PtON1-Ph (DFT)                         | 79.15                                              | 91.53                             | 89.41                             | 101.95                                              | 165.73                                             | 168.10                            |
| PtON1-CF <sub>3</sub>                  | 79.25                                              | 91.55                             | 89.35                             | 101.86                                              | 166.15                                             | 167.67                            |



|                                 |           |           |           |            |            |            |
|---------------------------------|-----------|-----------|-----------|------------|------------|------------|
| (DFT)                           |           |           |           |            |            |            |
| PtON6 (DFT) <sup>S3</sup>       | 79.10     | 91.14     | 90.55     | 100.24     | 167.20     | 172.12     |
| PtON6-tBu (DFT) <sup>S3</sup>   | 79.13     | 91.19     | 90.40     | 100.39     | 166.94     | 172.10     |
| PtON7 (DFT) <sup>S3</sup>       | 79.74     | 89.90     | 89.06     | 103.25     | 164.74     | 168.89     |
| PtON7-tBu (DFT) <sup>S3</sup>   | 79.77     | 89.99     | 89.02     | 103.11     | 165.11     | 168.81     |
| PtON7-dtb (DFT) <sup>S3</sup>   | 79.58     | 89.78     | 89.06     | 103.40     | 164.86     | 169.11     |
| PtON7-dtb (X-ray) <sup>S3</sup> | 80.39(15) | 89.38(16) | 90.54(13) | 101.58(13) | 165.71(14) | 167.68(13) |

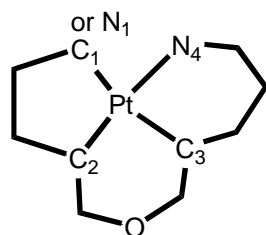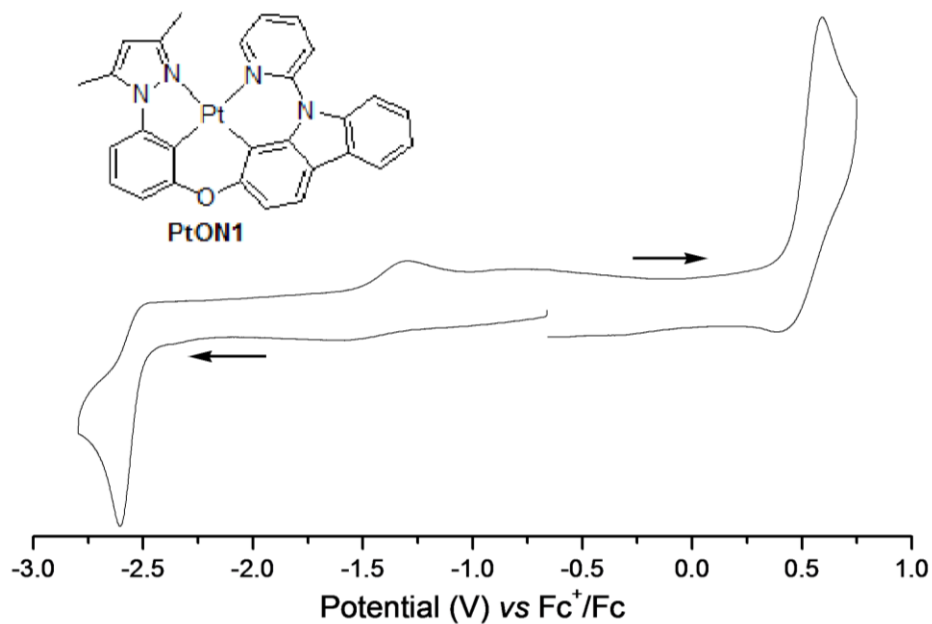

**Figure S13:** The cyclic voltammogram for **PtON1** with the molecular structure inset in the plot.

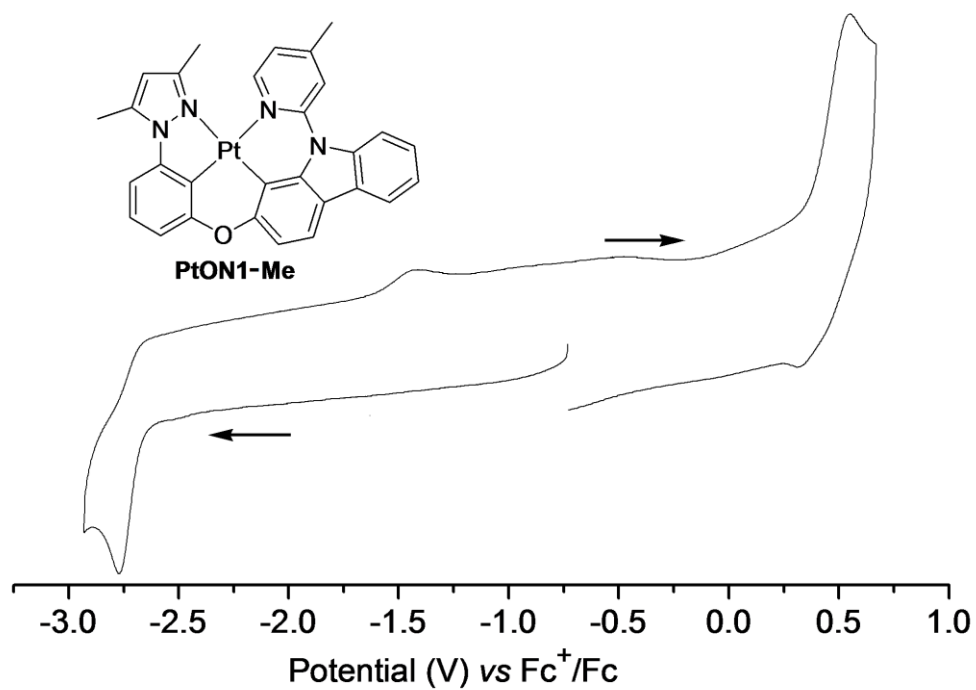

**Figure S14:** The cyclic voltammogram for **PtON1-Me** with the molecular structure inset in the plot.

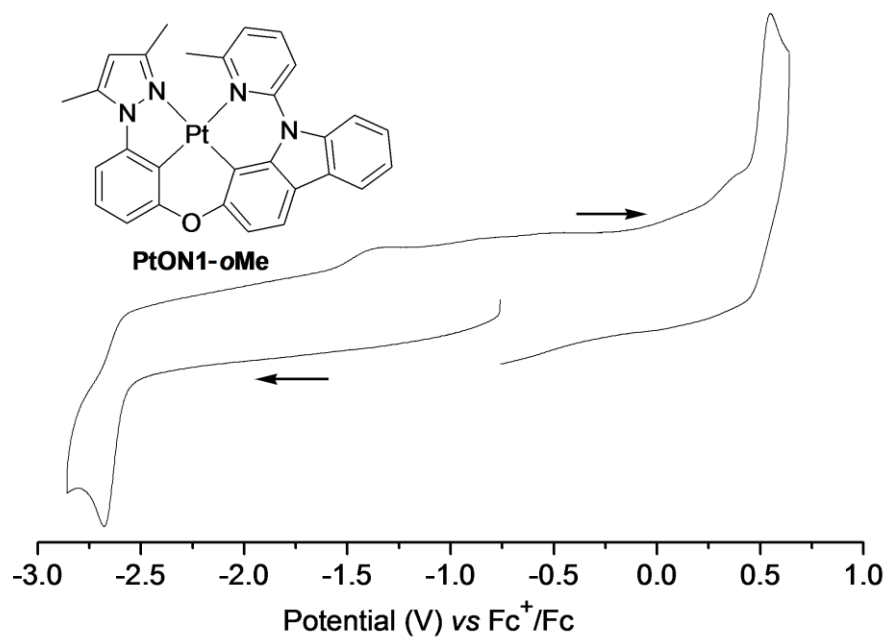

**Figure S15:** The cyclic voltammogram for **PtON1-oMe** with the molecular structure inset in the plot.

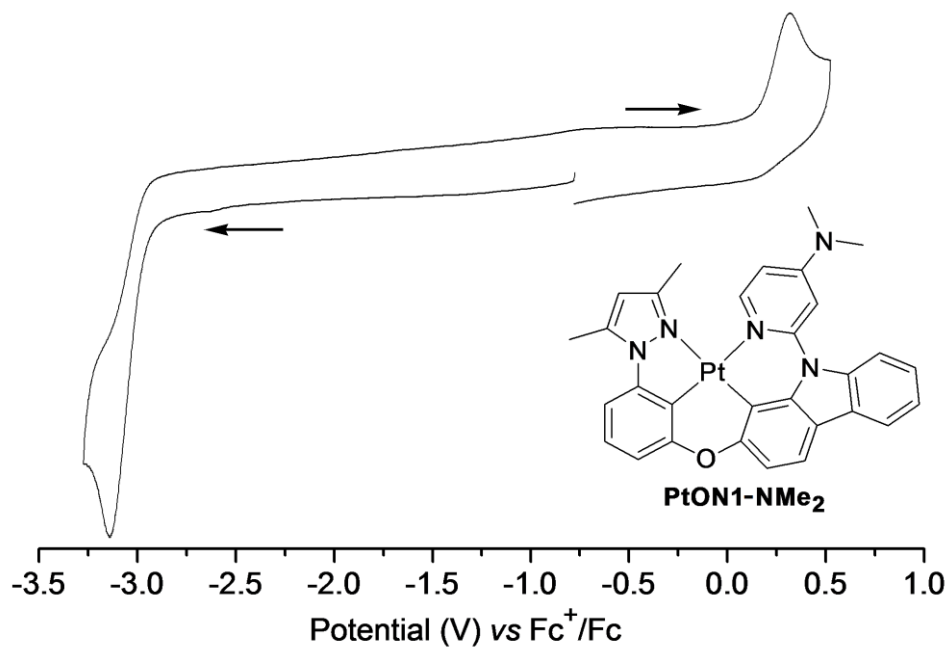

**Figure S16:** The cyclic voltammogram for **PtON1-NMe<sub>2</sub>** with the molecular structure inset in the plot.

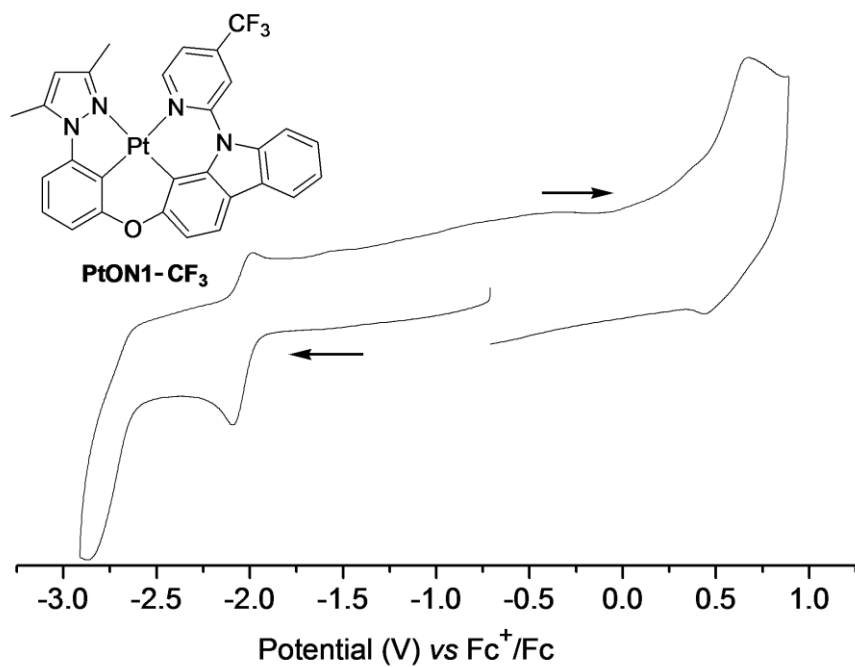

**Figure S17:** The cyclic voltammogram for **PtON1-CF<sub>3</sub>** with the molecular structure inset in the plot.

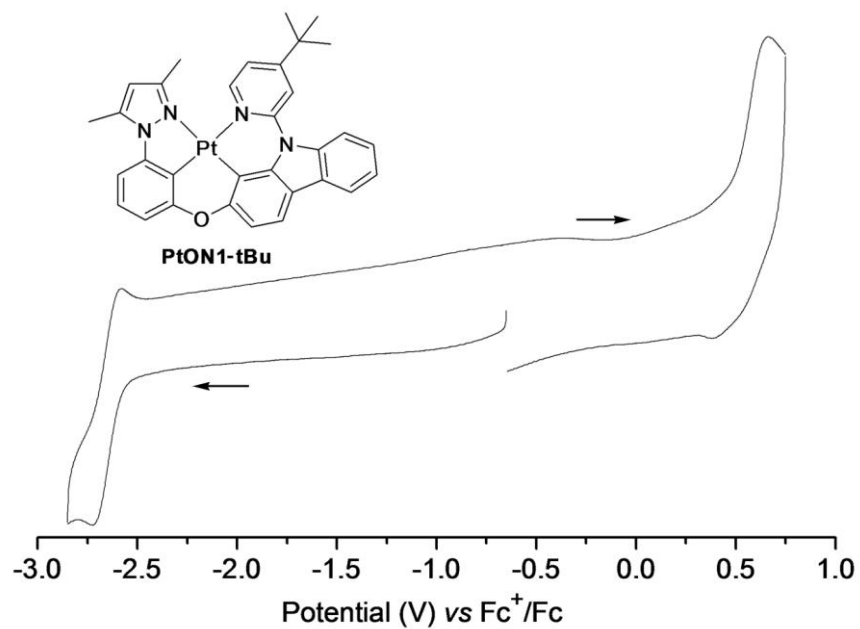

**Figure S18:** The cyclic voltammogram for **PtON1-tBu** with the molecular structure inset in the plot.

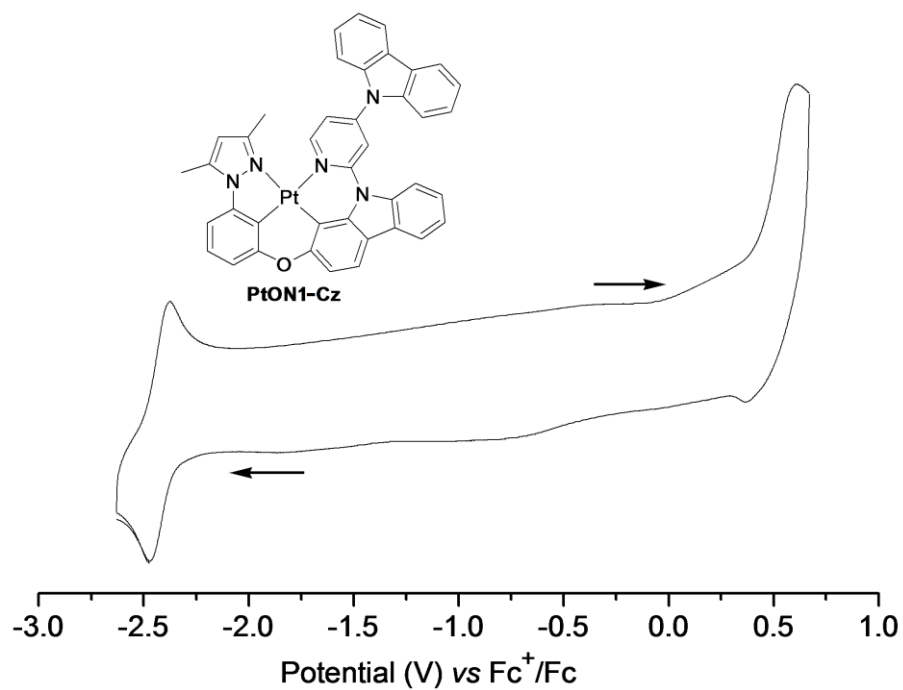

**Figure S19:** The cyclic voltammogram for **PtON1-Cz** with the molecular structure inset in the plot.

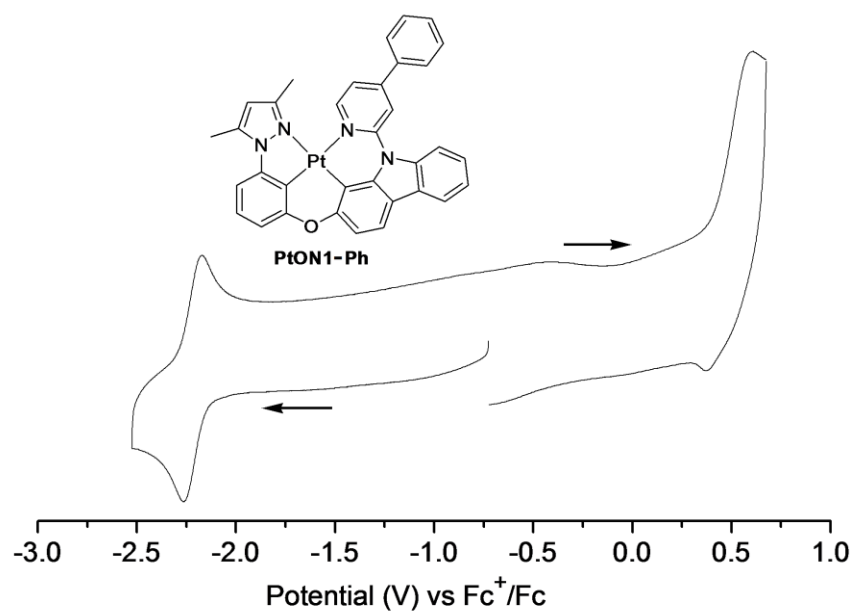

**Figure S20:** The cyclic voltammogram for **PtON1-Ph** with the molecular structure inset in the plot.

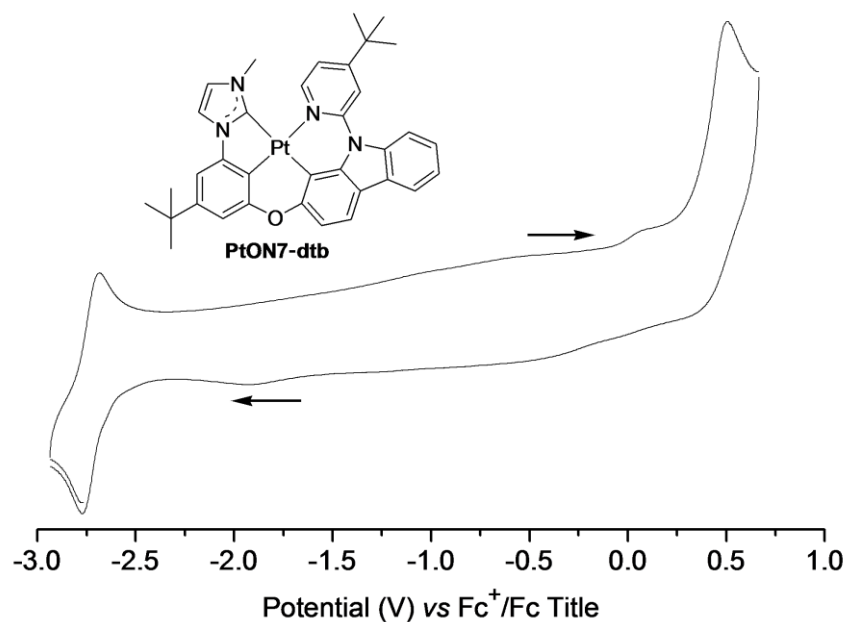

**Figure S21:** The cyclic voltammogram for **PtON7-dtb** with the molecular structure inset in the plot.

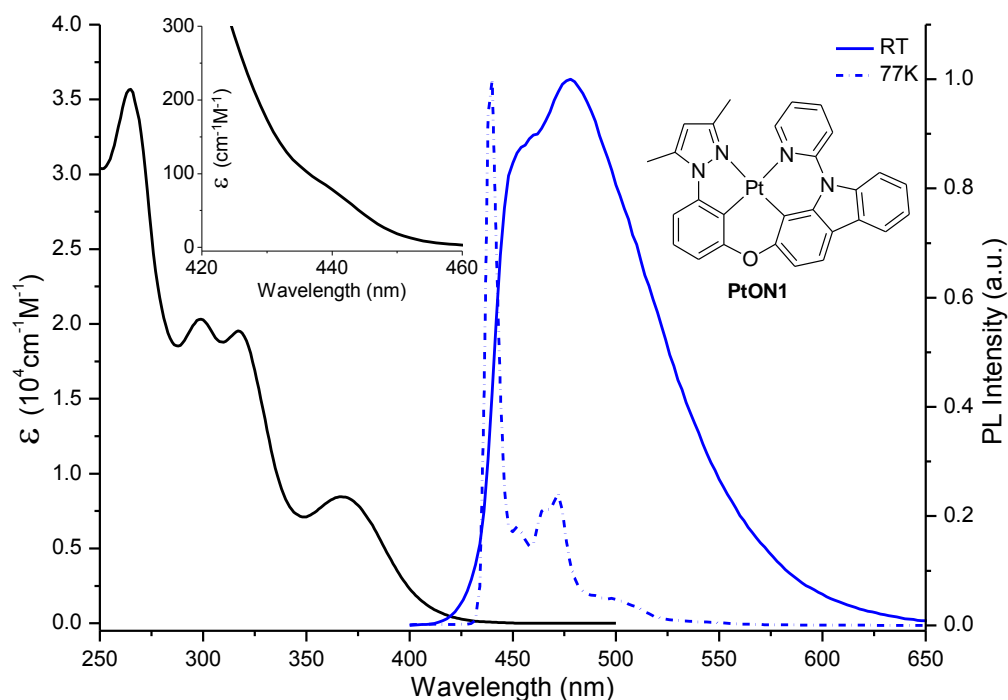

**Figure S22:** Absorption spectra (in  $\text{CH}_2\text{Cl}_2$ ) and emission spectra (room temperature in  $\text{CH}_2\text{Cl}_2$ , 77K in 2-methyl THF) of **PtON1**. The  $T_1$  absorption transition and the chemical structure of **PtON1** are shown in the inset.<sup>3</sup>

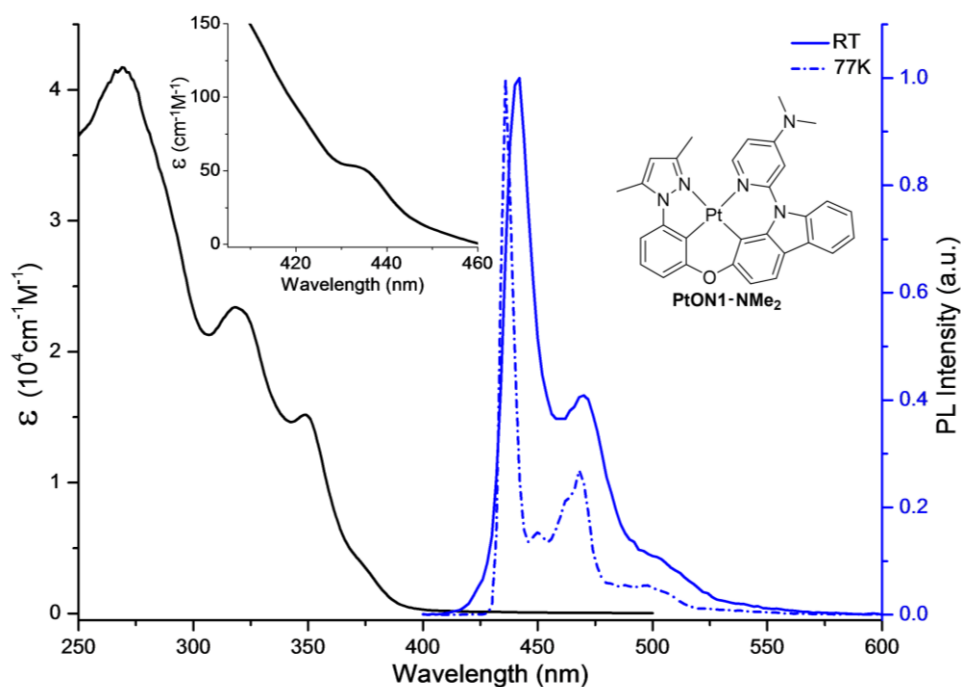

**Figure S23:** Absorption spectra (in  $\text{CH}_2\text{Cl}_2$ ) and emission spectra (room temperature in  $\text{CH}_2\text{Cl}_2$ , 77K in 2-methyl THF) of **PtON1-NMe<sub>2</sub>**. The  $T_1$  absorption transition and the chemical structure of **PtON1-NMe<sub>2</sub>** are shown in the inset.

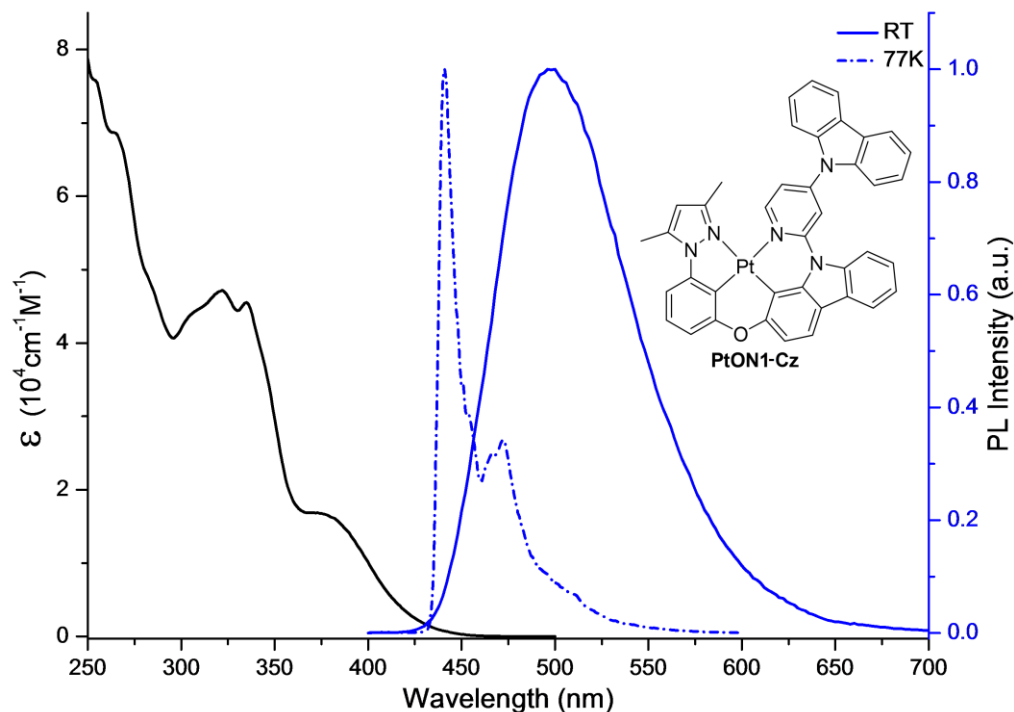

**Figure S24:** Absorption spectra (in  $\text{CH}_2\text{Cl}_2$ ) and emission spectra (room temperature in  $\text{CH}_2\text{Cl}_2$ , 77K in 2-methyl THF) of **PtON1-Cz**. The  $T_1$  absorption transition and the chemical structure of **PtON1-Cz** are shown in the inset.

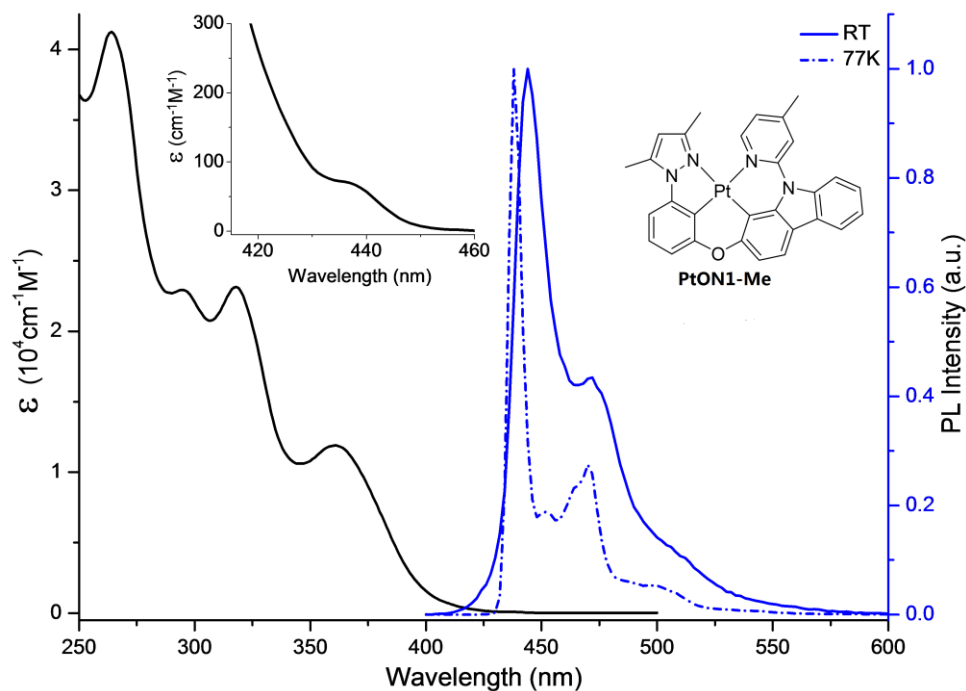

**Figure S25:** Absorption spectra (in  $\text{CH}_2\text{Cl}_2$ ) and emission spectra (room temperature in  $\text{CH}_2\text{Cl}_2$ , 77K in 2-methyl THF) of **PtON1-Me**. The  $T_1$  absorption transition and the chemical structure of **PtON1-Me** are shown in the inset.

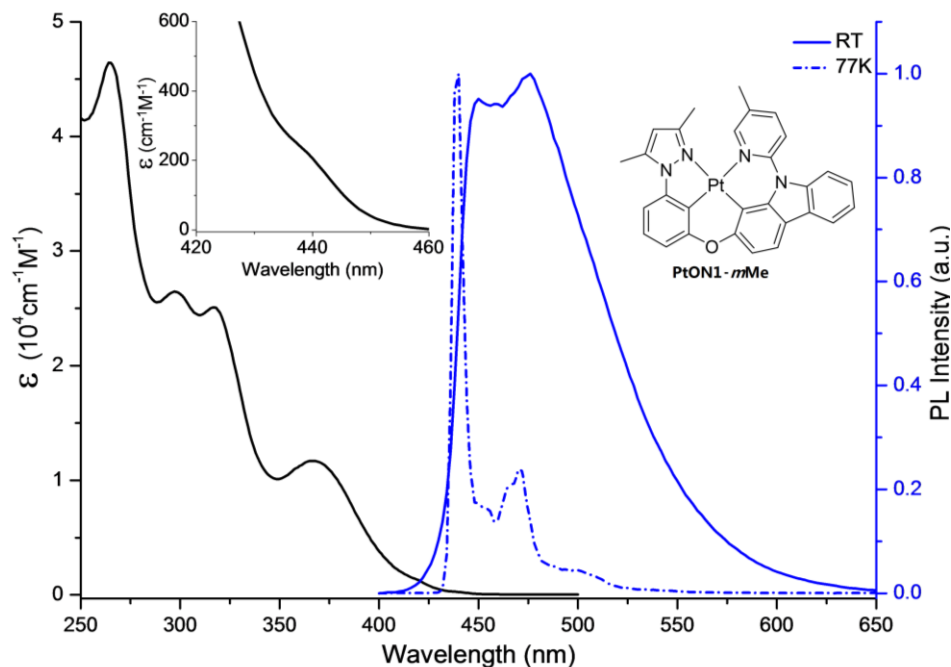

**Figure S26:** Absorption spectra (in  $\text{CH}_2\text{Cl}_2$ ) and emission spectra (room temperature in  $\text{CH}_2\text{Cl}_2$ , 77K in 2-methyl THF) of **PtON1-*m*Me**. The  $T_1$  absorption transition and the chemical structure of **PtON1-*m*Me** are shown in the inset.

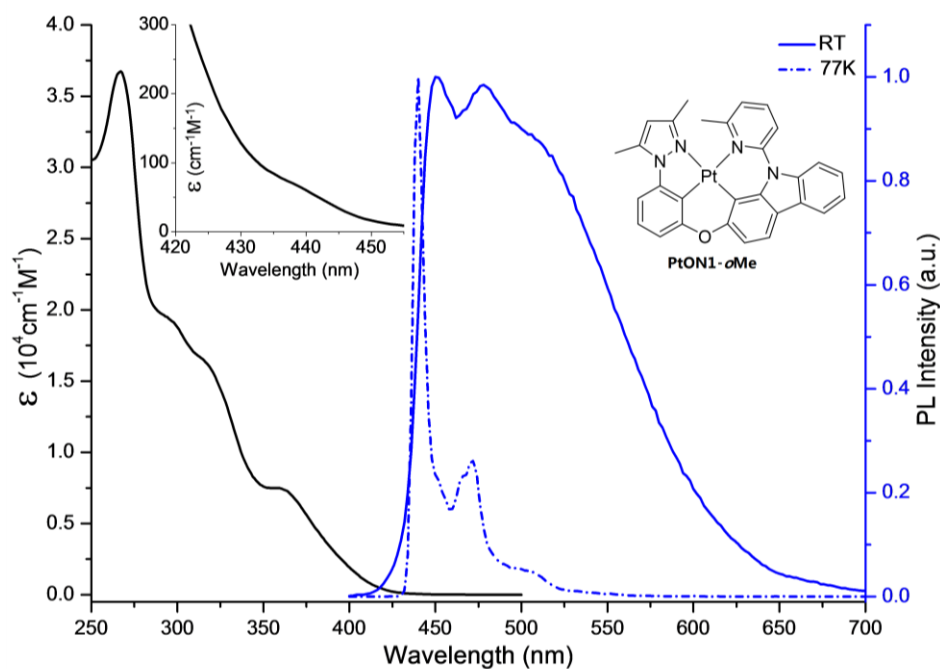

**Figure S27:** Absorption spectra (in  $\text{CH}_2\text{Cl}_2$ ) and emission spectra (room temperature in  $\text{CH}_2\text{Cl}_2$ , 77K in 2-methyl THF) of **PtON1-*o*Me**. The  $T_1$  absorption transition and the chemical structure of **PtON1-*o*Me** are shown in the inset.



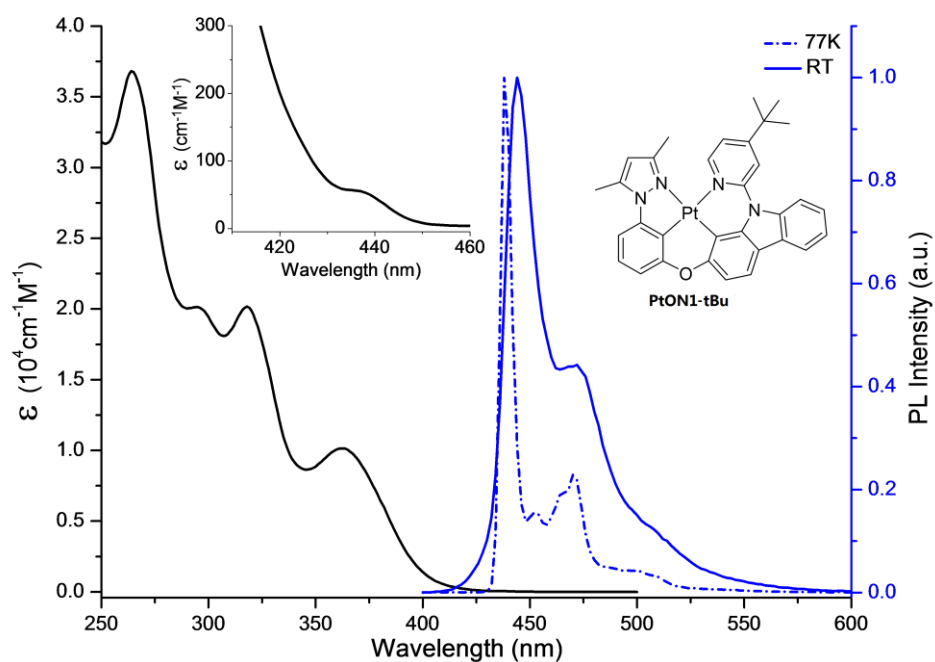

**Figure S28:** Absorption spectra (in  $\text{CH}_2\text{Cl}_2$ ) and emission spectra (room temperature in  $\text{CH}_2\text{Cl}_2$ , 77K in 2-methyl THF) of **PtON1-tBu**. The  $T_1$  absorption transition and the chemical structure of **PtON1-tBu** are shown in the inset.<sup>3</sup>

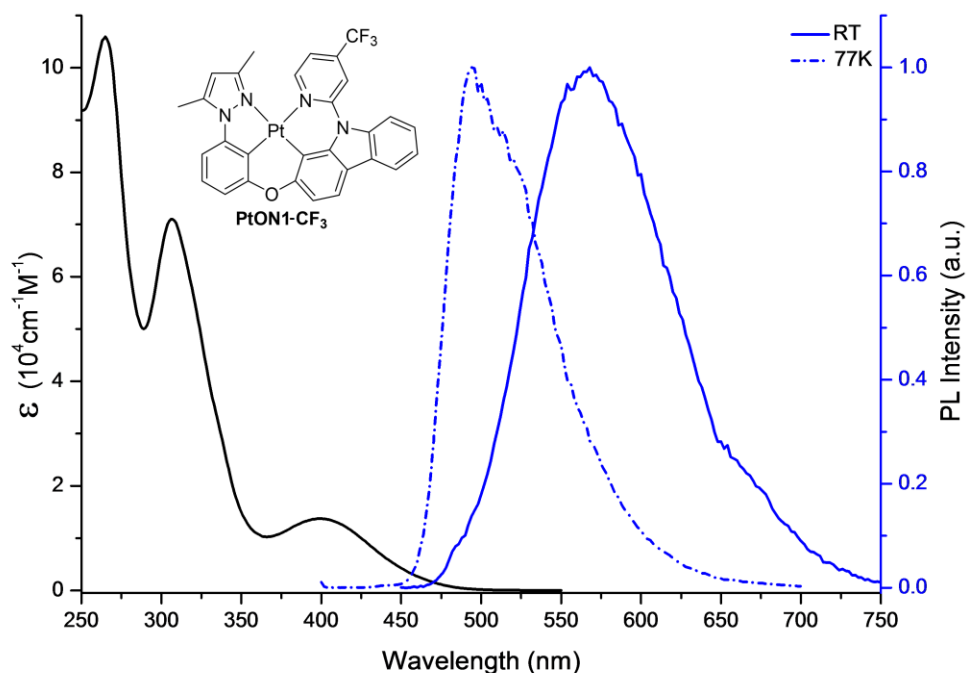

**Figure S29:** Absorption spectra (in  $\text{CH}_2\text{Cl}_2$ ) and emission spectra (room temperature in  $\text{CH}_2\text{Cl}_2$ , 77K in 2-methyl THF) of **PtON1-CF<sub>3</sub>**. The  $T_1$  absorption transition and the chemical structure of **PtON1-CF<sub>3</sub>** are shown in the inset.

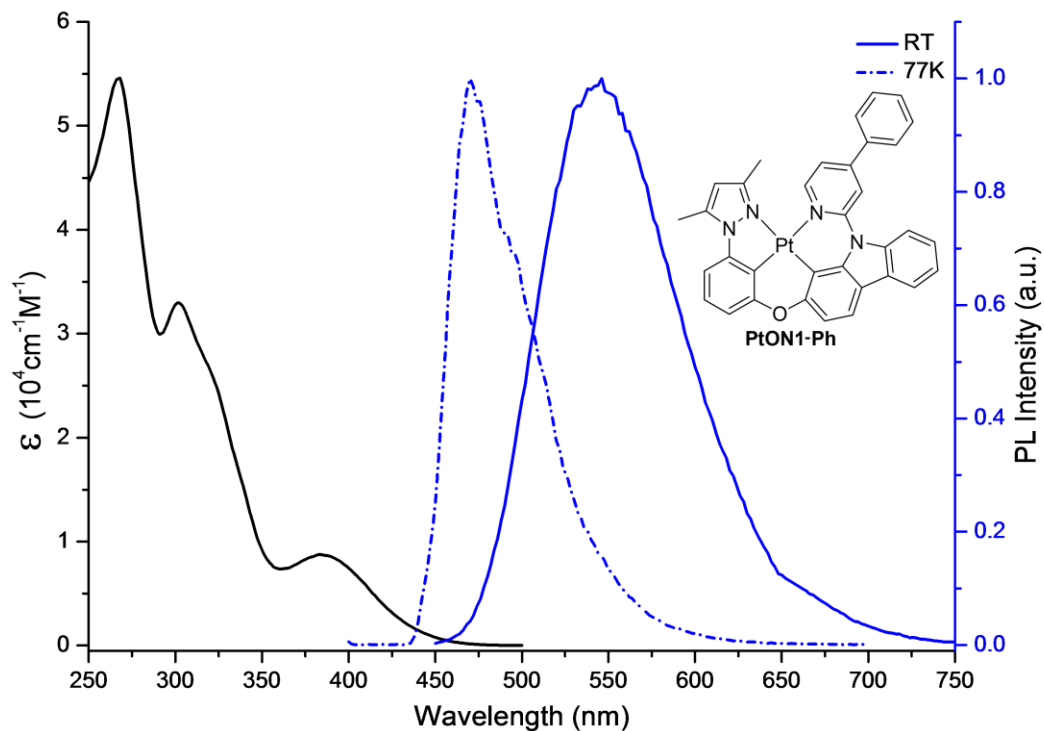

**Figure S30:** Absorption spectra (in  $\text{CH}_2\text{Cl}_2$ ) and emission spectra (room temperature in  $\text{CH}_2\text{Cl}_2$ , 77K in 2-methyl THF) of **PtON1-Ph**. The  $T_1$  absorption transition and the chemical structure of **PtON1-Ph** are shown in the inset.

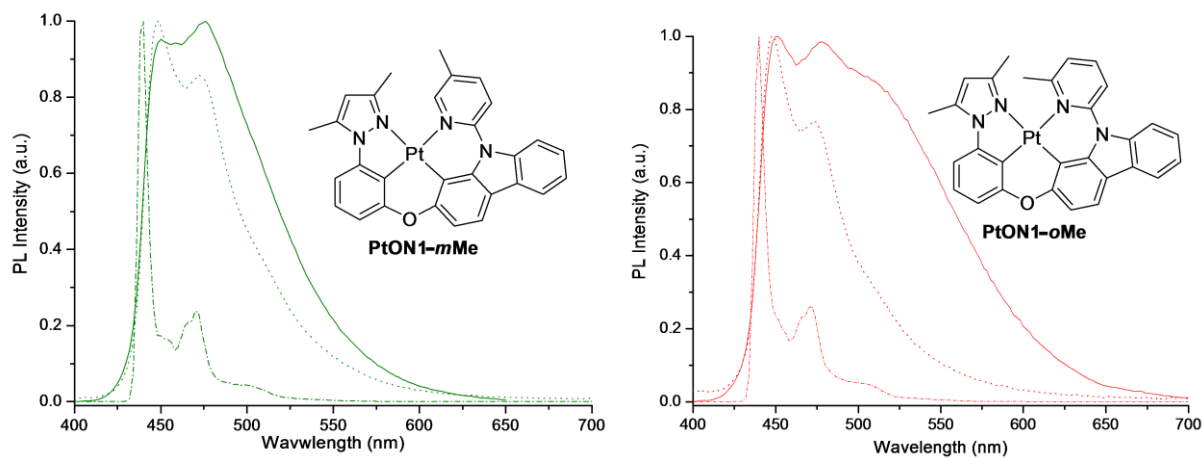

**Figure S31:** Photoluminescence spectra of **PtON1-mMe** (left) and **PtON1-oMe** (right) at room temperature in  $\text{CH}_2\text{Cl}_2$  (solid lines), doped in PMMA (dotted lines) and 77K in 2-Me-THF (dash-dotted lines) with the molecular structure of each emitter inset.

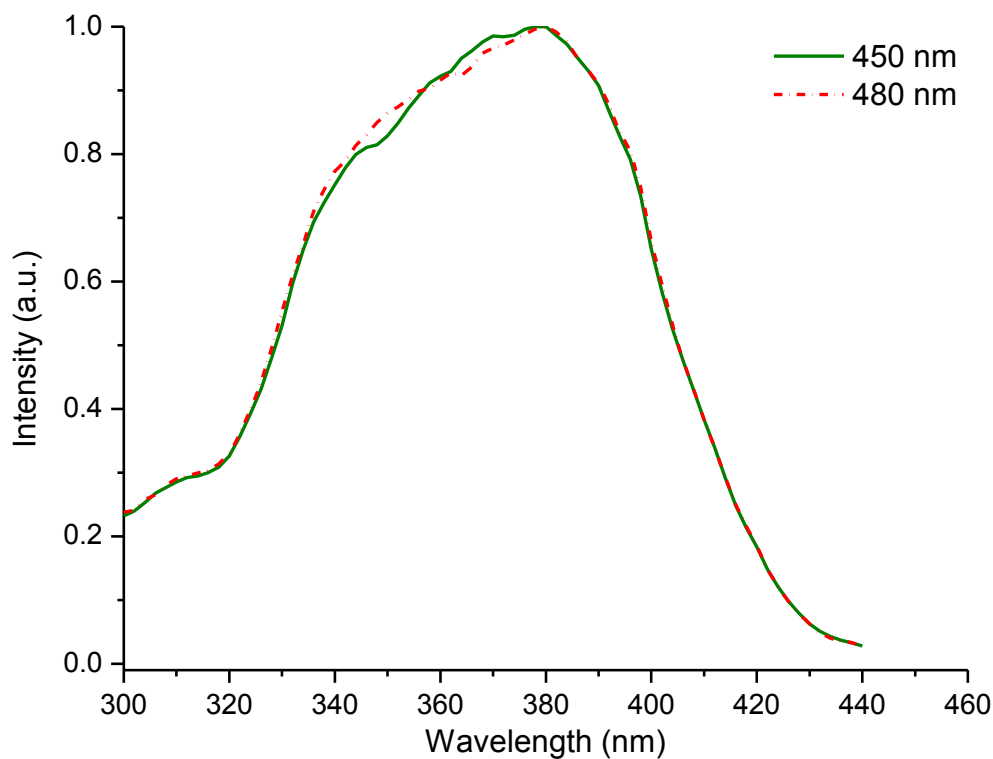

**Figure S32:** Excitation spectra of **PtON1**(monitored at 450 nm and 480 nm respectively)

#### References:

- (S1) Li, G.; Fleetham, T.; Turner, E.; Hang, X-C.; Li, J. Highly efficient and stable narrow-band phosphorescent emitters for OLED applications. *Adv. Optical Mater.* **2015**, 3, 390-397.
- (S2) Cuperly, O.; Cros, P.; Frot, Y. First direct C-2-lithiation of 4-DMAP. Convenient access to reactive functional derivatives and ligands. *J. Org. Chem.* **2002**, 67, 238-241.
- (S3) Fleetham, T.; Li, G.; Wen, L. Efficient “pure” blue OLEDs employing tetradentate Pt complexes with a narrow spectral bandwidth. *Adv. Mater.* **2014**, 26, 7116-7121.
